# Supplementary material for: Electrochemical reductive cross-coupling of acyl chlorides and sulfinic acids towards the synthesis of thioesters
Source: Royal Society of Chemistry journal article supplement (doi:10.1039/d2gc02424a), 2022-01-01

# Supporting Information

## Electrochemical Reductive Cross-coupling of Acyl chlorides and Sulfinic Acids towards the Synthesis of Thioesters

Jie Xu,<sup>†a</sup> Fangling Lu,<sup>†a</sup> Linghong Sun,<sup>a</sup> Mingna Huang,<sup>a</sup> Jianwei Jiang,<sup>a</sup> Ke Wang,<sup>a</sup> Dandan Ouyang,<sup>a</sup> Lijun Lu,<sup>\*b</sup> Aiwen Lei<sup>\*a,b</sup>

<sup>a</sup> National Research Center for Carbohydrate Synthesis, Jiangxi Province's Key Laboratory of Chemical Biology, Jiangxi Normal University, Nanchang 330022, P. R. China

<sup>b</sup> College of Chemistry and Molecular Sciences, Institute for Advanced Studies (IAS), Engineering Research Center of Organosilicon Compounds & Materials (Ministry of Education), Wuhan University, Wuhan, Hubei 430072, P. R. China

E-mail: aiwenlei@whu.edu.cn; ljlu@whu.edu.cn

<sup>†</sup> Jie Xu and Fangling Lu contributed equally to this work.

## Table of Contents

|                                                                                            |            |
|--------------------------------------------------------------------------------------------|------------|
| <b>General information.....</b>                                                            | <b>S3</b>  |
| <b>Experimental procedure.....</b>                                                         | <b>S4</b>  |
| <b>Mechanism research .....</b>                                                            | <b>S7</b>  |
| <b>Detail descriptions for products.....</b>                                               | <b>S10</b> |
| <b>References.....</b>                                                                     | <b>S22</b> |
| <b>Copies of <sup>1</sup>H NMR, <sup>13</sup>C NMR and <sup>19</sup>F NMR spectra.....</b> | <b>S24</b> |

## General information

Unless otherwise noted, materials were obtained from commercial suppliers (Leyan and so on) and used without further purification. The instrument for electrolysis was dual display potentiostat (DJS-292B) (made in China). The anodic electrode was zinc plate (20 mm×15 mm×0.3 mm) and cathodic electrode was stainless steel plate (20 mm×15 mm×1.0 mm). Thin-layer chromatography (TLC) employed glass 0.25 mm silica gel plates. Flash chromatography columns were packed with 300-400 mesh silica gel in petroleum (boiling point was between 60-90°C). Gradient flash chromatography was conducted eluting with a continuous gradient from petroleum to the indicated solvent, and they were listed as volume/volume ratios. NMR spectra were recorded on a Bruker spectrometer at 400 MHz (<sup>1</sup>H NMR), 101 MHz (<sup>13</sup>C NMR), 376 MHz (<sup>19</sup>F NMR). Chemical shifts were reported relative to tetramethylsilane, dimethyl sulfoxide (2.50 ppm for <sup>1</sup>H, 39.6 ppm for <sup>13</sup>C), chloroform (7.26 ppm for <sup>1</sup>H, 77.16 ppm for <sup>13</sup>C). And all <sup>1</sup>H, <sup>13</sup>C and <sup>19</sup>F NMR data spectra were reported in delta (δ) units, parts per million (ppm) downfield from the internal standard. Coupling constants (*J*) are reported in Hertz (Hz). GC-MS spectra were recorded on a Shimadzu GC-MS QP2010 Ultra. High resolution mass spectra (HRMS) were measured with Bruker UltiMate3000 & Compact, accurate masses are reported for the molecular ion + hydrogen ([M+H<sup>+</sup>]), the molecular ion + sodium ([M+Na<sup>+</sup>]) and the molecular ion + potassium ([M+K<sup>+</sup>]).

## Experimental procedure

### General procedure for the preparation of sulfinic acids:<sup>1</sup>

Benzenesulfinic acid and *p*-toluenesulfinic acid were obtained by acidification of the commercially available sodium benzenesulfinate and sodium *p*-toluenesulfinate, then the mixture was extracted by Et<sub>2</sub>O. After dried by Na<sub>2</sub>SO<sub>4</sub>, the solvent was removed under vacuum at 0 °C to provide pure product. Other arylsulfinic acids, heteroaromatic sulfinic acids were prepared by the following procedures: arylsulfonyl chloride (10 mmol) and anhydrous sodium sulfite (30 mmol) were added into 20 mL of water. The reaction mixture was kept at 70-80 °C for 5 h. After the reaction was complete, the mixture was washed with chloroform. The water phase was acidified with excess concentrated HCl solution at 0 °C, then extracted by Et<sub>2</sub>O. After dried by Na<sub>2</sub>SO<sub>4</sub>, the organic solvent was removed under vacuum at 0 °C to provide pure products.

### General procedure for the preparation of 3aa-3zd:

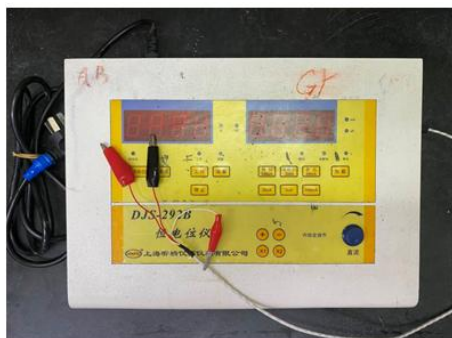

Fig S1 Instrument for electrolysis

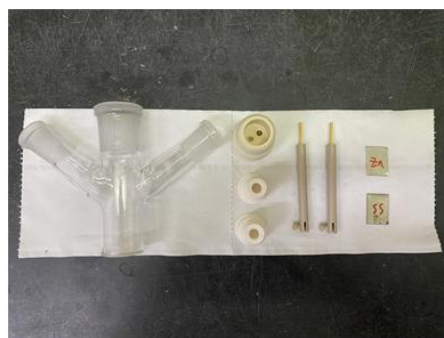

Fig S2 Electrode materials

In an oven-dried undivided three-necked bottle (25 mL) equipped with a stir bar, Acyl chlorides **1** (1.5 mmol), benzenesulfinic acid **2a** (0.5 mmol), <sup>n</sup>Bu<sub>4</sub>NBF<sub>4</sub> (0.5 mmol, 164.6 mg), PPh<sub>3</sub> (0.5 mmol, 131.1 mg), Tf<sub>2</sub>O (0.5 mmol, 84 μL), MeCN (12 mL) were added. The bottle was equipped with zinc plate (20 mm×15 mm×0.3 mm) as the anode and stainless steel plate (20 mm×15 mm×1.0 mm) as the cathode. The reaction mixture was stirred and electrolyzed at a constant current of 6 mA under Ar atmosphere at room temperature for 2 h. After completion of the reaction, as indicated by TLC and GC-MS, the pure product was obtained by flash column chromatography on silica gel (petroleum ether: ethyl acetate = 400: 1).

### General procedure for the preparation of 3ab-3ak:

In an oven-dried undivided three-necked bottle (25 mL) equipped with a stir bar, 4-Methylbenzoyl

chloride **1a** (1.5 mmol), sulfinic acids **2** (0.5 mmol),  $n\text{Bu}_4\text{NBF}_4$  (0.5 mmol, 164.6 mg),  $\text{PPh}_3$  (0.5 mmol, 131.1 mg),  $\text{Tf}_2\text{O}$  (0.5 mmol, 84  $\mu\text{L}$ ), MeCN (12 mL) were added. The bottle was equipped with zinc plate (20 mm $\times$ 15 mm $\times$ 0.3 mm) as the anode and stainless steel plate (20 mm $\times$ 15 mm $\times$ 1.0 mm) as the cathode. The reaction mixture was stirred and electrolyzed at a constant current of 6 mA under Ar atmosphere at room temperature for 2 h. After completion of the reaction, as indicated by TLC and GC-MS, the pure product was obtained by flash column chromatography on silica gel (petroleum ether: ethyl acetate = 400: 1).

#### **Procedure for gram scale synthesis of 3aa:**

In an oven-dried undivided three-necked bottle (250 mL) equipped with a stir bar, 4-Methylbenzoyl chloride **1a** (15.0 mmol, 1.98 mL), benzenesulfinic acid **2a** (5 mmol, 711 mg),  $n\text{Bu}_4\text{NBF}_4$  (5.0 mmol, 1646.4 mg),  $\text{PPh}_3$  (5.0 mmol, 1311.1 mg),  $\text{Tf}_2\text{O}$  (5.0 mmol, 840  $\mu\text{L}$ ), MeCN (120 mL) were added. The bottle was equipped with zinc plate (20 mm $\times$ 15 mm $\times$ 0.3 mm) as the anode and stainless steel plate (20 mm $\times$ 15 mm $\times$ 1.0 mm) as the cathode. The reaction mixture was stirred and electrolyzed at a constant current of 10 mA under Ar atmosphere at room temperature for 6 h. After completion of the reaction, as indicated by TLC and GC-MS, the pure product (yield 75%, white solid, 0.85 g) was obtained by flash column chromatography on silica gel (petroleum ether: ethyl acetate = 400: 1).

#### **Procedure for the preparation of 5a:<sup>2</sup>**

To a solution of **3aa** in DMF (0.1 M) was added phenylboronic acid (1.5 equiv.), CuI (20 mol%),  $\text{Pd}(\text{OAc})_2$  (5 mol%). After the mixture was stirred at 120  $^\circ\text{C}$  for 15 h. Upon completion of the reaction, the resulting mixture was diluted with EtOAc and washed with  $\text{H}_2\text{O}$ , dried over  $\text{Na}_2\text{SO}_4$ . The solvent was then removed under vacuo. The residue was purified by column chromatography on silica gel to give the corresponding product **5a** in 35% yield.

#### **Procedure for the preparation of 6a:<sup>3</sup>**

To a solution of **3aa** in 1,4-dioxane (0.2 M) was added  $\text{Ni}(\text{dppp})\text{Cl}_2$  (10 mol%),  $\text{Na}_2\text{CO}_3$  (1.5 equiv.). After the mixture was stirred at 160  $^\circ\text{C}$  for 15 h. After completion of the reaction, as indicated by TLC and GC-MS. The solvent was then removed under vacuo. The residue was purified by column chromatography on silica gel to give the corresponding product **6a** in 48% yield.

### **Procedure for the preparation of 7a/8a:<sup>4</sup>**

To a solution of **3aa** in DMF (0.05 M) was added BnNH<sub>2</sub> (2.5 equiv.). After the mixture was stirred at room temperature for 1 h. Upon completion of the reaction, the resulting mixture was diluted with EtOAc and washed with H<sub>2</sub>O, dried over Na<sub>2</sub>SO<sub>4</sub>. The solvent was then removed under vacuo. The residue was purified by column chromatography on silica gel to give the corresponding product **7a** (76% yield) and **8a** (73% yield).

## Mechanism research

### Radical trapping experiments:

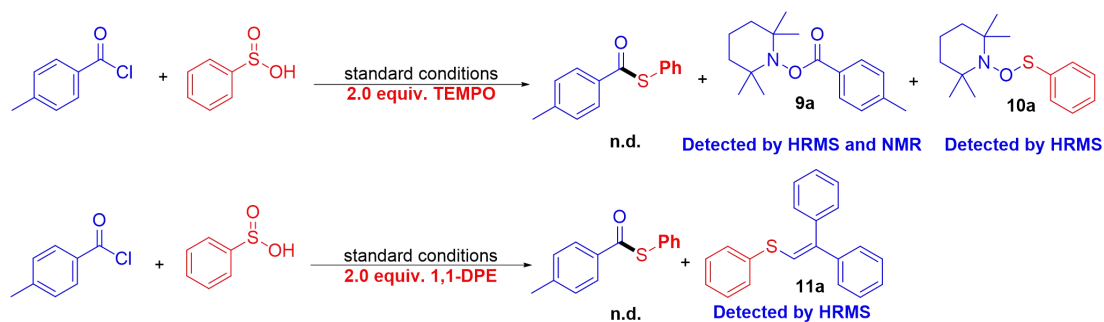

In an oven-dried undivided three-necked bottle (25 mL) equipped with a stir bar, 4-Methylbenzoyl chloride **1a** (1.5 mmol), benzenesulfonic acid **2a** (0.5 mmol),  $n\text{-Bu}_4\text{NBF}_4$  (0.5 mmol, 164.6 mg),  $\text{PPh}_3$  (0.5 mmol, 131.1 mg),  $\text{Ti}_2\text{O}$  (0.5 mmol, 84  $\mu\text{L}$ ), MeCN (12 mL), 2,2,6,6-tetramethylpiperidine 1-oxyl (TEMPO) or 1,1-diphenylethene (DPE) were added. The bottle was equipped with zinc plate (20 mm $\times$ 15 mm $\times$ 0.3 mm) as the anode and stainless steel plate (20 mm $\times$ 15 mm $\times$ 1.0 mm) as the cathode. The reaction mixture was stirred and electrolyzed at a constant current of 6 mA under Ar atmosphere at room temperature for 2 h. After completion of the reaction, as indicated by TLC and HRMS, The **9a**, **10a** and **11a** adducts was detected by HRMS in the reaction system. These results indicated this reaction probably underwent a radical pathway, and thiyl radical and acyl radical might be involved in the transformation.

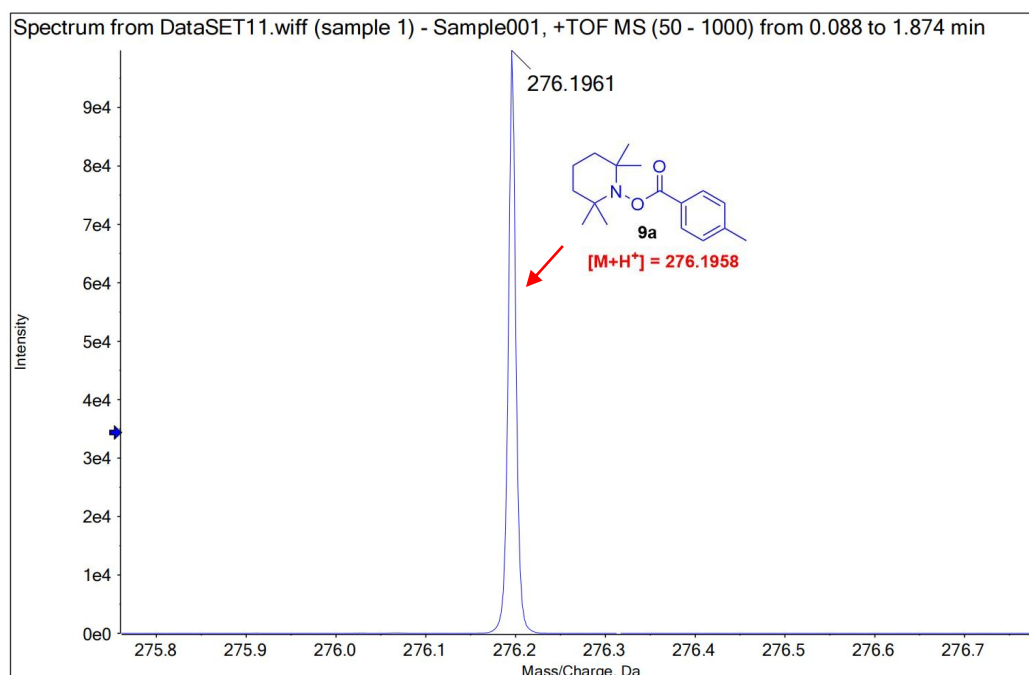

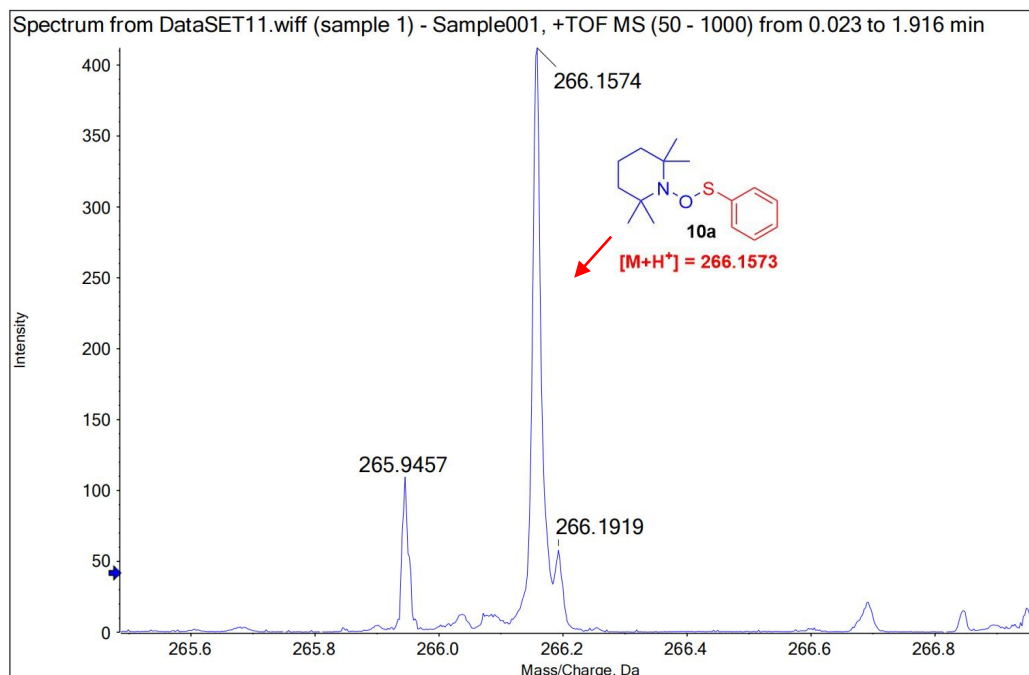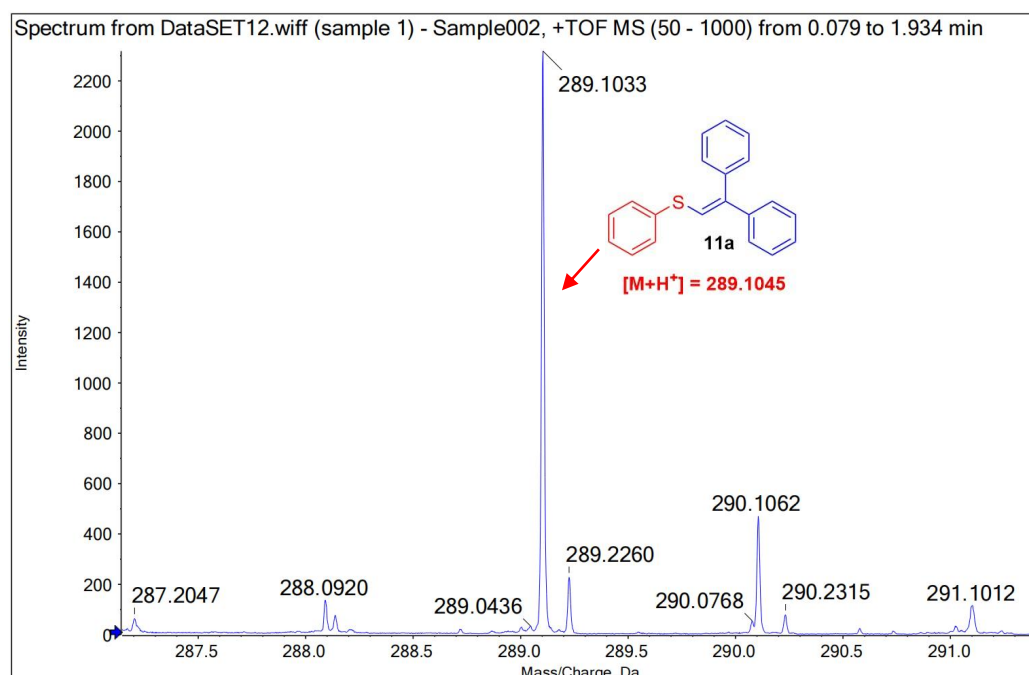

### CV experiments:

Cyclic voltammetry was performed in a three-electrode cell connected to a schlenk line under Ar at room temperature. The working electrode was a glassy carbon electrode, the counter electrode a platinum wire. The reference was an Ag/AgCl electrode submerged in saturated aqueous KCl solution. 10 mL of CH<sub>3</sub>CN containing 0.01 M <sup>n</sup>Bu<sub>4</sub>NBF<sub>4</sub> were poured into the electrochemical cell in all experiments. The scan rate is 0.1 V/s, ranging from 0 V to 3.0 V. The peak potentials vs. Ag/AgCl for used. The reduction peak of benzoyl chloride observed at -1.45 V and two relatively



reduction peaks of benzenesulfonic acid were observed at -2.21 V and -1.66 V. The CV of Tf<sub>2</sub>O in acetonitrile exhibits two oxidation waves, one at -1.14 V and the other at -1.95 V. It demonstrated that the reduction of Tf<sub>2</sub>O occurred preferentially during the reaction process.

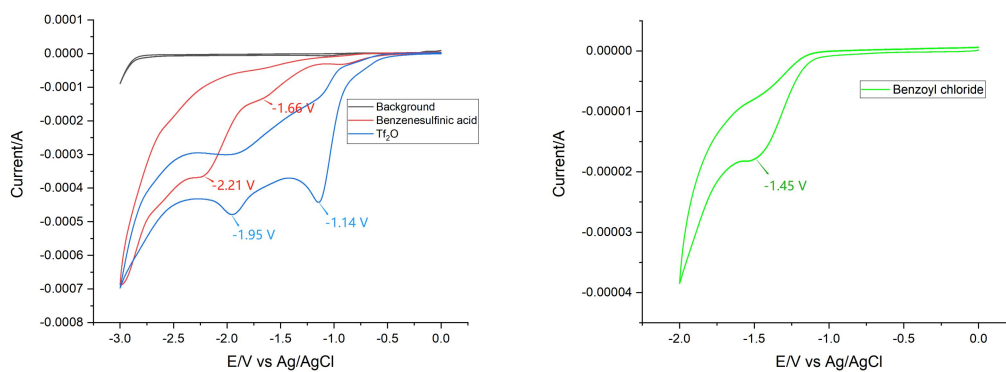

**Figure S3** Cyclic voltammogram

## Detail descriptions for products

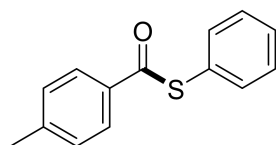

**S-phenyl 4-methylbenzothioate (3aa)**<sup>5</sup> (White solid was obtained in 80% isolated yield, 91.2 mg). <sup>1</sup>H NMR (400 MHz, DMSO-*d*<sub>6</sub>) δ 7.88 (d, *J* = 8.0 Hz, 2H), 7.50 (s, 5H), 7.38 (d, *J* = 8.0 Hz, 2H), 2.38 (s, 3H); <sup>13</sup>C NMR (101 MHz, DMSO-*d*<sub>6</sub>) δ 188.7, 145.0, 135.1, 133.4, 129.8, 129.7, 129.5, 127.3, 126.9, 21.4.

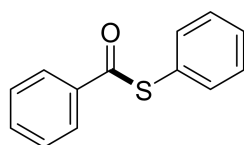

**S-phenyl benzothioate (3ba)**<sup>5</sup> (White solid was obtained in 80% isolated yield, 85.7 mg). <sup>1</sup>H NMR (400 MHz, DMSO-*d*<sub>6</sub>) δ 7.98 (d, *J* = 8.0 Hz, 2H), 7.72 (t, *J* = 8.0 Hz, 1H), 7.58 (t, *J* = 8.0 Hz, 2H), 7.51 (s, 5H); <sup>13</sup>C NMR (101 MHz, DMSO-*d*<sub>6</sub>) δ 189.4, 136.0, 135.2, 134.5, 129.9, 129.6, 129.4, 127.2, 126.8.

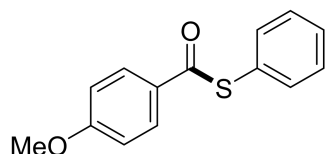

**S-phenyl 4-methoxybenzothioate (3ca)**<sup>5</sup> (White solid was obtained in 87% isolated yield, 106.1 mg). <sup>1</sup>H NMR (400 MHz, DMSO-*d*<sub>6</sub>) δ 7.95 (d, *J* = 8.0 Hz, 2H), 7.49 (s, 5H), 7.09 (d, *J* = 8.0 Hz, 2H), 3.84 (s, 3H); <sup>13</sup>C NMR (101 MHz, DMSO-*d*<sub>6</sub>) δ 187.6, 164.1, 135.3, 129.8, 129.6, 129.5, 128.6, 127.2, 114.6, 55.9.

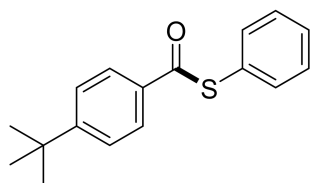

**S-phenyl 4-(tert-butyl)benzothioate (3da)**<sup>6</sup> (White solid was obtained in 82% isolated yield, 111.3 mg). <sup>1</sup>H NMR (400 MHz, DMSO-*d*<sub>6</sub>) δ 7.91 (d, *J* = 8.0 Hz, 2H), 7.58 (d, *J* = 8.0 Hz, 2H), 7.49 (s, 5H), 1.28 (s, 9H); <sup>13</sup>C NMR (101 MHz, DMSO-*d*<sub>6</sub>) δ 188.7, 157.6, 135.1, 133.4, 129.8, 129.5, 127.2, 126.9, 126.2, 35.1, 30.8.

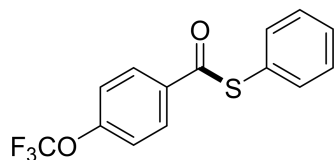

**S-phenyl 4-(trifluoromethoxy)benzothioate (3ea)**<sup>7</sup> (White solid was obtained in 50% isolated yield, 74.5 mg). <sup>1</sup>H NMR (400 MHz, DMSO-*d*<sub>6</sub>) δ 8.08 (d, *J* = 8.0 Hz, 2H), 7.52 (s, 1H), 7.49 (s, 6H); <sup>13</sup>C NMR (101 MHz, DMSO-*d*<sub>6</sub>) δ 188.1, 152.4, 135.1, 134.7, 130.0, 129.7, 129.6, 126.5, 121.3, 120.1 (q, *J* = 262.6 Hz); <sup>19</sup>F NMR (376 MHz, DMSO-*d*<sub>6</sub>) δ -56.90.

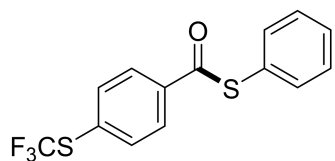

**S-phenyl 4-((trifluoromethyl)thio)benzothioate (3fa)**. (White solid was obtained in 56% isolated yield, 88.1 mg). <sup>1</sup>H NMR (400 MHz, DMSO-*d*<sub>6</sub>) δ 8.04 (d, *J* = 12.0 Hz, 2H), 7.84 (d, *J* = 8.0 Hz, 2H), 7.48 (s, 5H); <sup>13</sup>C NMR (101 MHz, DMSO-*d*<sub>6</sub>) δ 188.8, 137.9, 136.3, 135.1, 130.1, 129.9 (q, *J* = 10.1 Hz), 129.7, 129.5 (q, *J* = 313.1 Hz), 128.4, 126.4; <sup>19</sup>F NMR (376 MHz, DMSO-*d*<sub>6</sub>) δ -41.36. HRMS (ESI) calcd for C<sub>14</sub>H<sub>10</sub>F<sub>3</sub>OS<sub>2</sub>: 315.0120 (M+H<sup>+</sup>), found: 315.0114.

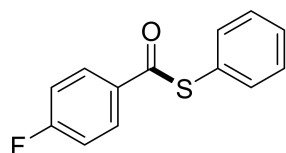

**S-phenyl 4-fluorobenzothioate (3ga)**<sup>5</sup> (White solid was obtained in 79% isolated yield, 91.8 mg). <sup>1</sup>H NMR (400 MHz, DMSO-*d*<sub>6</sub>) δ 8.06–8.02 (m, 2H), 7.50 (s, 5H), 7.40 (t, *J* = 8.0 Hz, 2H); <sup>13</sup>C NMR (101 MHz, DMSO-*d*<sub>6</sub>) δ 188.1, 165.8 (d, *J* = 252.5 Hz), 135.3, 132.7 (d, *J* = 10.1 Hz), 130.4 (d, *J* = 10.1 Hz), 130.1, 129.7, 126.7, 116.6 (d, *J* = 20.2 Hz); <sup>19</sup>F NMR (376 MHz, DMSO-*d*<sub>6</sub>) δ -104.12.

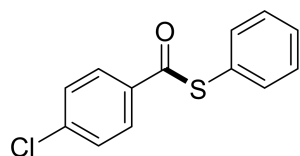

**S-phenyl 4-chlorobenzothioate (3ha)**<sup>5</sup> (White solid was obtained in 46% isolated yield, 56.8 mg). <sup>1</sup>H NMR (400 MHz, DMSO-*d*<sub>6</sub>) δ 7.97 (d, *J* = 8.0 Hz, 2H), 7.64 (d, *J* = 12.0 Hz, 2H), 7.50 (s, 5H); <sup>13</sup>C NMR (101 MHz, DMSO-*d*<sub>6</sub>) δ 188.5, 139.4, 135.3,

134.7, 130.2, 129.8, 129.7, 129.2, 126.5.

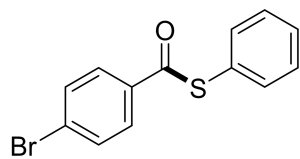

**S-phenyl 4-bromobenzothioate (3ia)**<sup>6</sup> (White solid was obtained in 54% isolated yield, 78.6 mg). <sup>1</sup>H NMR (400 MHz, DMSO-*d*<sub>6</sub>) δ 7.89 (d, *J* = 8.0 Hz, 2H), 7.79 (d, *J* = 8.0 Hz, 2H), 7.51 (s, 5H); <sup>13</sup>C NMR (101 MHz, DMSO-*d*<sub>6</sub>) δ 188.6, 135.2, 135.0, 132.5, 130.1, 129.7, 129.2, 128.5, 126.4.

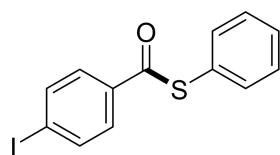

**S-phenyl 4-iodobenzothioate (3ja)** (White solid was obtained in 43% isolated yield, 73.9 mg). <sup>1</sup>H NMR (400 MHz, DMSO-*d*<sub>6</sub>) δ 7.96 (d, *J* = 8.0 Hz, 2H), 7.71 (d, *J* = 8.0 Hz, 2H), 7.50 (s, 5H); <sup>13</sup>C NMR (101 MHz, DMSO-*d*<sub>6</sub>) δ 189.1, 138.5, 135.3, 135.3, 130.2, 129.8, 128.9, 126.5, 103.3.

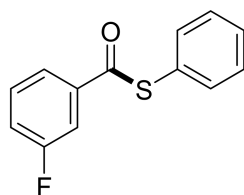

**S-phenyl 3-fluorobenzothioate (3ka)** (White solid was obtained in 70% isolated yield, 81.2 mg). <sup>1</sup>H NMR (400 MHz, DMSO-*d*<sub>6</sub>) δ 7.84 (d, *J* = 8.0 Hz, 1H), 7.69–7.55 (m, 3H), 7.51 (s, 5H); <sup>13</sup>C NMR (101 MHz, DMSO-*d*<sub>6</sub>) δ 188.4, 162.6 (d, *J* = 252.5 Hz), 138.1 (d, *J* = 10.1 Hz), 135.1, 131.8 (d, *J* = 10.1 Hz), 130.1, 129.7, 126.4, 123.6, 121.4 (d, *J* = 20.2 Hz), 113.7 (d, *J* = 20.2 Hz); <sup>19</sup>F NMR (376 MHz, DMSO-*d*<sub>6</sub>) δ -111.12.

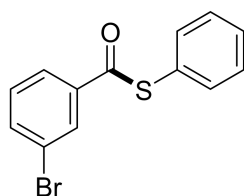

**S-phenyl 3-bromobenzothioate (3la)**<sup>5</sup> (White solid was obtained in 85% isolated yield, 123.8 mg). <sup>1</sup>H NMR (400 MHz, DMSO-*d*<sub>6</sub>) δ 8.02 (s, 1H), 7.97 (d, *J* = 8.0 Hz,

1H), 7.89 (d,  $J = 8.0$  Hz, 1H), 7.55 (d,  $J = 8.0$  Hz, 1H), 7.51 (s, 5H);  $^{13}\text{C}$  NMR (101 MHz, DMSO- $d_6$ )  $\delta$  188.2, 137.9, 137.0, 135.1, 131.6, 130.1, 129.7, 129.4, 126.4, 126.3, 122.6.

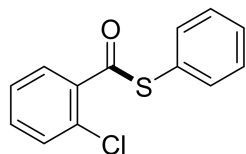

**S-phenyl 2-chlorobenzothioate (3ma)**<sup>5</sup> (White solid was obtained in 68% isolated yield, 83.9 mg).  $^1\text{H}$  NMR (400 MHz, DMSO- $d_6$ )  $\delta$  7.82 (d,  $J = 8.0$  Hz, 1H), 7.61–7.58 (m, 2H), 7.53–7.48 (m, 6H);  $^{13}\text{C}$  NMR (101 MHz, DMSO- $d_6$ )  $\delta$  190.0, 136.8, 134.9, 133.6, 131.0, 130.3, 129.9, 129.5, 129.3, 127.9, 126.9.

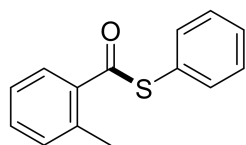

**S-phenyl 2-methylbenzothioate (3na)**<sup>8</sup> (White solid was obtained in 85% isolated yield, 96.9 mg).  $^1\text{H}$  NMR (400 MHz, DMSO- $d_6$ )  $\delta$  7.88 (d,  $J = 8.0$  Hz, 1H), 7.54–7.50 (m, 6H), 7.40–7.35 (m, 2H), 2.39 (s, 3H);  $^{13}\text{C}$  NMR (101 MHz, DMSO- $d_6$ )  $\delta$  191.5, 136.5, 136.4, 134.9, 132.5, 131.9, 129.9, 129.6, 128.2, 127.6, 126.5, 20.2.

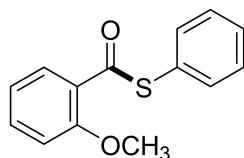

**S-phenyl 2-methoxybenzothioate (3oa)**<sup>5</sup> (White solid was obtained in 89% isolated yield, 108.3 mg).  $^1\text{H}$  NMR (400 MHz, DMSO- $d_6$ )  $\delta$  7.74–7.72 (m, 1H), 7.61–7.57 (m, 1H), 7.48 (t,  $J = 8.0$  Hz, 5H), 7.21 (d,  $J = 12.0$  Hz, 1H), 7.07 (t,  $J = 8.0$  Hz, 1H), 3.88 (s, 3H);  $^{13}\text{C}$  NMR (101 MHz, DMSO- $d_6$ )  $\delta$  188.5, 157.7, 135.1, 134.8, 129.7, 129.5, 129.3, 128.3, 125.8, 120.7, 113.0, 56.1.

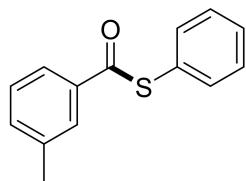

**S-phenyl 3-methylbenzothioate (3pa)**<sup>7</sup> (White solid was obtained in 84% isolated yield, 95.8 mg).  $^1\text{H}$  NMR (400 MHz, DMSO- $d_6$ )  $\delta$  7.77 (d,  $J = 8.0$  Hz, 2H),

7.52–7.43 (m, 7H), 2.37 (s, 3H);  $^{13}\text{C}$  NMR (101 MHz, DMSO- $d_6$ )  $\delta$  189.4, 139.0, 136.1, 135.2, 135.1, 129.9, 129.6, 129.3, 127.5, 126.9, 124.5, 21.0.

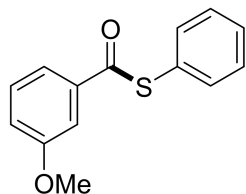

**S-phenyl 3-methoxybenzothioate (3qa)**<sup>8</sup> (White solid was obtained in 72% isolated yield, 88.0 mg).  $^1\text{H}$  NMR (400 MHz, DMSO- $d_6$ )  $\delta$  7.58 (d,  $J$  = 4.0 Hz, 1H), 7.49 (t,  $J$  = 8.0 Hz, 6H), 7.39 (s, 1H), 7.29–7.26 (m, 1H), 3.79 (s, 3H);  $^{13}\text{C}$  NMR (101 MHz, DMSO- $d_6$ )  $\delta$  189.4, 159.8, 137.5, 135.3, 130.8, 130.1, 129.7, 126.9, 120.4, 119.8, 111.7, 55.7.

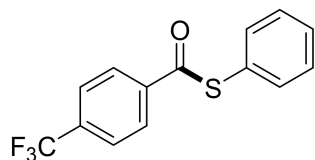

**S-phenyl 4-(trifluoromethyl)benzothioate (3ra)**<sup>9</sup> (White solid was obtained in 78% isolated yield, 110.5 mg).  $^1\text{H}$  NMR (400 MHz, DMSO- $d_6$ )  $\delta$  8.13 (d,  $J$  = 8.0 Hz, 2H), 7.91 (d,  $J$  = 8.0 Hz, 2H), 7.51 (s, 5H);  $^{13}\text{C}$  NMR (101 MHz, DMSO- $d_6$ )  $\delta$  188.9, 139.3, 135.0, 133.7 (q,  $J$  = 30.3 Hz), 130.1, 129.7, 128.1, 126.4, 126.3, 123.7 (q,  $J$  = 272.7 Hz);  $^{19}\text{F}$  NMR (376 MHz, DMSO- $d_6$ )  $\delta$  -61.88.

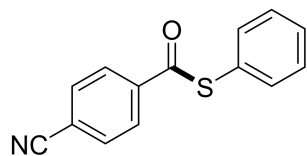

**S-phenyl 4-cyanobenzothioate (3sa)**<sup>5</sup> (White solid was obtained in 77% isolated yield, 92.1 mg).  $^1\text{H}$  NMR (400 MHz, DMSO- $d_6$ )  $\delta$  8.08 (d,  $J$  = 8.0 Hz, 2H), 8.02 (d,  $J$  = 8.0 Hz, 2H), 7.51 (s, 5H);  $^{13}\text{C}$  NMR (101 MHz, DMSO- $d_6$ )  $\delta$  188.9, 139.2, 135.1, 133.5, 130.3, 129.8, 128.0, 126.1, 118.2, 116.4.

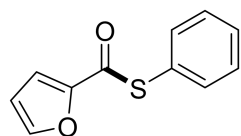

**S-phenyl furan-2-carbothioate (3ta)**<sup>5</sup> (White solid was obtained in 82% isolated yield, 84.1 mg).  $^1\text{H}$  NMR (400 MHz, DMSO- $d_6$ )  $\delta$  8.08 (s, 1H), 7.50 (s, 5H),

7.49–7.47 (m, 1H), 7.80–7.78 (m, 1H);  $^{13}\text{C}$  NMR (101 MHz, DMSO- $d_6$ )  $\delta$  177.7, 149.4, 148.7, 135.4, 130.1, 129.7, 125.8, 117.8, 113.4.

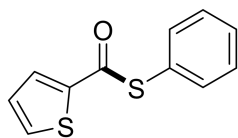

**S-phenyl thiophene-2-carbothioate (3ua)**<sup>5</sup> (White solid was obtained in 78% isolated yield, 85.3 mg).  $^1\text{H}$  NMR (400 MHz, DMSO- $d_6$ )  $\delta$  8.11–8.09 (m, 1H), 8.03–8.01 (m, 1H), 7.53–7.48 (m, 5H), 7.30–7.28 (m, 1H);  $^{13}\text{C}$  NMR (101 MHz, DMSO- $d_6$ )  $\delta$  181.4, 140.3, 135.5, 135.2, 132.9, 130.1, 129.7, 129.2, 126.4.

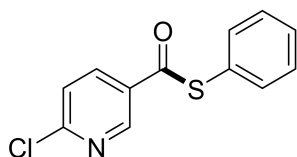

**S-phenyl 6-chloropyridine-3-carbothioate (3va)** (White solid was obtained in 80% isolated yield, 99.7 mg).  $^1\text{H}$  NMR (400 MHz, DMSO- $d_6$ )  $\delta$  8.92 (d,  $J$  = 4.0 Hz, 1H), 8.34–8.31 (m, 1H), 7.71 (d,  $J$  = 8.0 Hz, 1H), 7.51 (s, 5H);  $^{13}\text{C}$  NMR (101 MHz, DMSO- $d_6$ )  $\delta$  187.5, 155.2, 148.5, 138.3, 135.1, 131.1, 130.3, 129.8, 125.8, 125.3. HRMS (ESI) calcd for  $\text{C}_{12}\text{H}_9\text{ClNOS}$ : 250.0088 ( $\text{M}+\text{H}^+$ ), found: 250.0089.

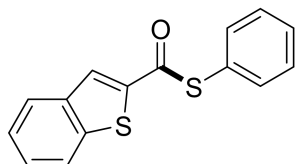

**S-phenyl benzo[b]thiophene-2-carbothioate (3wa)** (Yellow solid was obtained in 50% isolated yield, 67.5 mg).  $^1\text{H}$  NMR (400 MHz, DMSO- $d_6$ )  $\delta$  8.43 (s, 1H), 8.07 (t,  $J$  = 8.0 Hz, 2H), 7.57–7.47 (m, 7H);  $^{13}\text{C}$  NMR (101 MHz, DMSO- $d_6$ )  $\delta$  182.9, 141.3, 139.8, 138.7, 135.1, 130.2, 130.0, 129.7, 128.2, 126.7, 126.2, 125.7, 123.3. HRMS (ESI) calcd for  $\text{C}_{15}\text{H}_{10}\text{NaOS}_2$ : 293.0065 ( $\text{M}+\text{Na}^+$ ), found: 293.0059.

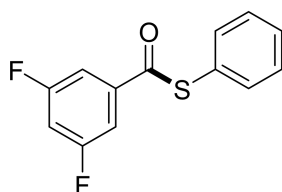

**S-phenyl 3,5-difluorobenzothioate (3xa)**<sup>10</sup> (White solid was obtained in 88%

isolated yield, 116.4 mg).  $^1\text{H NMR}$  (400 MHz,  $\text{DMSO-}d_6$ )  $\delta$  7.68–7.56 (m, 3H), 7.53–7.49 (m, 5H);  $^{13}\text{C NMR}$  (101 MHz,  $\text{DMSO-}d_6$ )  $\delta$  187.5 (t,  $J = 3.0$  Hz), 162.7 (dd,  $J = 250.5, 13.1$  Hz), 139.0 (t,  $J = 10.1$  Hz), 135.0, 130.3, 129.7, 126.0, 110.6 (dd,  $J = 20.2, 10.1$  Hz), 109.7 (t,  $J = 20.2$  Hz);  $^{19}\text{F NMR}$  (376 MHz,  $\text{DMSO-}d_6$ )  $\delta$  -107.11.

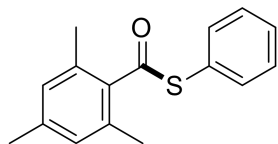

**S-phenyl 2,4,6-trimethylbenzothioate (3ya)**<sup>11</sup> (White solid was obtained in 95% isolated yield, 121.5 mg).  $^1\text{H NMR}$  (400 MHz,  $\text{DMSO-}d_6$ )  $\delta$  7.55–7.50 (m, 5H), 6.93 (s, 2H), 2.31 (s, 6H), 2.25 (s, 3H);  $^{13}\text{C NMR}$  (101 MHz,  $\text{DMSO-}d_6$ )  $\delta$  195.1, 139.5, 136.8, 134.4, 133.1, 129.9, 129.6, 128.4, 127.2, 20.8, 18.6.

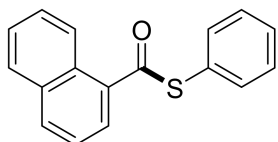

**S-phenyl naphthalene-1-carbothioate (3za)**<sup>9</sup> (White solid was obtained in 88% isolated yield, 116.4 mg).  $^1\text{H NMR}$  (400 MHz,  $\text{DMSO-}d_6$ )  $\delta$  8.35 (d,  $J = 8.0$  Hz, 1H), 8.19 (d,  $J = 8.0$  Hz, 2H), 8.02 (d,  $J = 8.0$  Hz, 1H), 7.64–7.52 (m, 8H);  $^{13}\text{C NMR}$  (101 MHz,  $\text{DMSO-}d_6$ )  $\delta$  191.6, 135.0, 134.2, 133.6, 133.6, 130.0, 129.6, 128.8, 128.5, 128.5, 128.0, 127.7, 127.1, 125.1, 124.6.

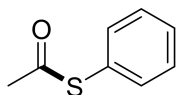

**S-phenyl ethanethioate (3zaa)**<sup>6</sup> (White solid was obtained in 48% isolated yield, 36.2 mg).  $^1\text{H NMR}$  (400 MHz,  $\text{DMSO-}d_6$ )  $\delta$  7.47–7.45 (m, 3H), 7.44–7.40 (m, 2H), 2.42 (s, 3H);  $^{13}\text{C NMR}$  (101 MHz,  $\text{DMSO-}d_6$ )  $\delta$  193.8, 134.6, 129.8, 129.6, 127.8, 30.4.

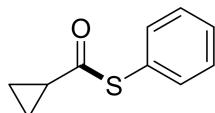

**S-phenyl cyclopropanecarbothioate (3zab)**<sup>12</sup> (White solid was obtained in 89% isolated yield, 78.9 mg).  $^1\text{H NMR}$  (400 MHz,  $\text{DMSO-}d_6$ )  $\delta$  7.46–7.40 (m, 5H), 2.25–2.19 (m, 1H), 1.06–1.02 (m, 4H);  $^{13}\text{C NMR}$  (101 MHz,  $\text{DMSO-}d_6$ )  $\delta$  196.7,



134.6, 129.6, 129.4, 127.4, 22.1, 11.1.

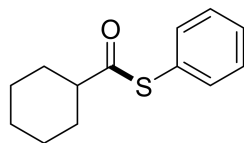

**S-phenyl cyclohexanecarbothioate (3zac)**<sup>13</sup> (White solid was obtained in 91% isolated yield, 100.5 mg). <sup>1</sup>H NMR (400 MHz, DMSO-*d*<sub>6</sub>) δ 7.45–7.42 (m, 3H), 7.40–7.36 (m, 2H), 2.67–2.60 (m, 1H), 1.90 (d, *J* = 8.0 Hz, 2H), 1.73–1.68 (m, 2H), 1.61–1.57 (m, 1H), 1.44–1.13 (m, 5H); <sup>13</sup>C NMR (101 MHz, DMSO-*d*<sub>6</sub>) δ 199.8, 134.6, 129.5, 129.4, 127.5, 51.7, 29.2, 25.3, 25.0.

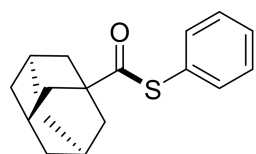

**S-phenyl (3r,5r,7r)-adamantane-1-carbothioate (3zad)**<sup>14</sup> (White solid was obtained in 85% isolated yield, 115.6 mg). <sup>1</sup>H NMR (400 MHz, DMSO-*d*<sub>6</sub>) δ 7.43 (t, *J* = 4.0 Hz, 3H), 7.36–7.33 (m, 2H), 2.02 (s, 3H), 1.91 (s, 6H), 1.72–1.65 (m, 6H); <sup>13</sup>C NMR (101 MHz, DMSO-*d*<sub>6</sub>) δ 202.9, 135.0, 129.4, 129.4, 127.5, 48.6, 38.9, 35.9, 27.8.

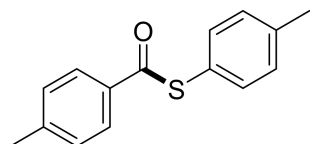

**S-(p-tolyl) 4-methylbenzothioate (3ab)**<sup>6</sup> (White solid was obtained in 74% isolated yield, 89.0 mg). <sup>1</sup>H NMR (400 MHz, DMSO-*d*<sub>6</sub>) δ 7.86 (d, *J* = 8.0 Hz, 2H), 7.37 (d, *J* = 8.0 Hz, 4H), 7.29 (d, *J* = 8.0 Hz, 2H), 2.39 (s, 3H), 2.36 (s, 3H); <sup>13</sup>C NMR (101 MHz, DMSO-*d*<sub>6</sub>) δ 188.8, 144.7, 139.4, 134.7, 133.5, 129.9, 129.6, 127.0, 123.4, 21.1, 20.7.

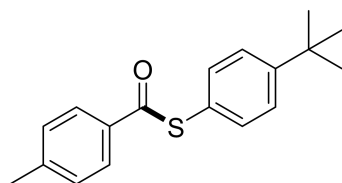

**S-(4-(tert-butyl)phenyl) 4-methylbenzothioate (3ac)**<sup>15</sup> (White solid was obtained in 63% isolated yield, 88.9 mg). <sup>1</sup>H NMR (400 MHz, DMSO-*d*<sub>6</sub>) δ 7.86 (d, *J* = 8.0 Hz, 2H), 7.47 (d, *J* = 8.0 Hz, 2H), 7.40–7.35 (m, 4H), 2.37 (s, 3H), 1.27 (s, 9H); <sup>13</sup>C

**NMR** (101 MHz, DMSO-*d*<sub>6</sub>)  $\delta$  189.1, 152.5, 145.0, 134.9, 133.5, 129.9, 127.3, 126.5, 123.6, 34.7, 31.1, 21.4.

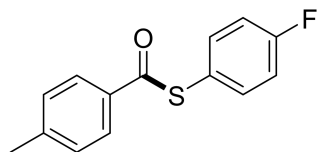

**S-(4-fluorophenyl) 4-methylbenzothioate (3ad)**<sup>16</sup> (White solid was obtained in 73% isolated yield, 89.4 mg). **<sup>1</sup>H NMR** (400 MHz, DMSO-*d*<sub>6</sub>)  $\delta$  7.86 (d, *J* = 8.0 Hz, 2H), 7.56–7.51 (m, 2H), 7.38–7.31 (m, 4H), 2.38 (s, 3H); **<sup>13</sup>C NMR** (101 MHz, DMSO-*d*<sub>6</sub>)  $\delta$  188.8, 163.2 (d, *J* = 252.5 Hz), 145.2, 137.7 (d, *J* = 10.1 Hz), 133.3, 129.9, 127.3, 122.7, 116.7 (d, *J* = 20.2 Hz), 21.4; **<sup>19</sup>F NMR** (376 MHz, DMSO-*d*<sub>6</sub>)  $\delta$  -111.32.

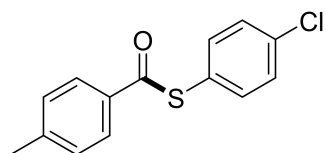

**S-(4-chlorophenyl) 4-methylbenzothioate (3ae)**<sup>6</sup> (White solid was obtained in 75% isolated yield, 98.3 mg). **<sup>1</sup>H NMR** (400 MHz, DMSO-*d*<sub>6</sub>)  $\delta$  7.86 (d, *J* = 8.0 Hz, 2H), 7.55–7.50 (m, 4H), 7.38 (d, *J* = 8.0 Hz, 2H), 2.39 (s, 3H); **<sup>13</sup>C NMR** (101 MHz, DMSO-*d*<sub>6</sub>)  $\delta$  188.1, 144.9, 136.4, 134.7, 133.2, 129.6, 129.2, 127.1, 126.0, 21.1.

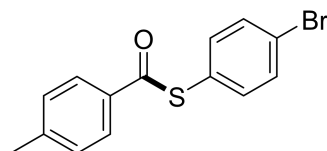

**S-(4-bromophenyl) 4-methylbenzothioate (3af)**<sup>16</sup> (White solid was obtained in 88% isolated yield, 135.2 mg). **<sup>1</sup>H NMR** (400 MHz, DMSO-*d*<sub>6</sub>)  $\delta$  7.86 (d, *J* = 8.0 Hz, 2H), 7.66 (d, *J* = 8.0 Hz, 2H), 7.44 (d, *J* = 8.0 Hz, 2H), 7.37 (d, *J* = 8.0 Hz, 2H), 2.39 (s, 3H); **<sup>13</sup>C NMR** (101 MHz, DMSO-*d*<sub>6</sub>)  $\delta$  187.8, 144.8, 136.6, 133.1, 132.1, 129.6, 127.0, 126.5, 123.2, 21.0.

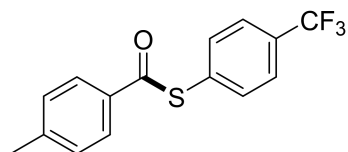

**S-(4-(trifluoromethyl)phenyl) 4-methylbenzothioate (3ag)** (White solid was obtained in 49% isolated yield, 73.2 mg). **<sup>1</sup>H NMR** (400 MHz, DMSO-*d*<sub>6</sub>)  $\delta$  7.89–7.84 (m, 4H), 7.75 (d, *J* = 8.0 Hz, 2H), 7.40 (d, *J* = 8.0 Hz, 2H), 2.40 (s, 3H);

$^{13}\text{C}$  NMR (101 MHz, DMSO- $d_6$ )  $\delta$  187.8, 145.5, 135.8, 133.1, 132.5, 130.1 (q,  $J$  =30.3 Hz), 130.0, 127.5, 126.2, 124.2 (q,  $J$  =272.7 Hz), 21.4;  $^{19}\text{F}$  NMR (376 MHz, DMSO- $d_6$ )  $\delta$  -61.39. HRMS (ESI) calcd for  $\text{C}_{15}\text{H}_{12}\text{F}_3\text{OS}$ : 297.0555 ( $\text{M}+\text{H}^+$ ), found: 297.0555.

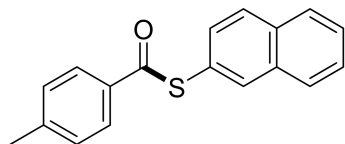

**S-(naphthalen-2-yl) 4-methylbenzothioate (3ah)**<sup>17</sup> (White solid was obtained in 74% isolated yield, 102.8 mg).  $^1\text{H}$  NMR (400 MHz, DMSO- $d_6$ )  $\delta$  8.12 (s, 1H), 8.00–7.93 (m, 3H), 7.90 (d,  $J$  = 8.0 Hz, 2H), 7.62–7.52 (m, 3H), 7.36 (d,  $J$  = 8.0 Hz, 2H), 2.38 (s, 3H);  $^{13}\text{C}$  NMR (101 MHz, DMSO- $d_6$ )  $\delta$  188.8, 144.8, 134.6, 133.5, 133.2, 132.9, 131.3, 129.7, 128.6, 127.8, 127.6, 127.3, 127.1, 126.7, 124.4, 21.1.

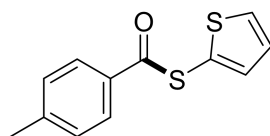

**S-(thiophen-2-yl) 4-methylbenzothioate (3ai)** (White solid was obtained in 41% isolated yield, 47.4 mg).  $^1\text{H}$  NMR (400 MHz, DMSO- $d_6$ )  $\delta$  7.92–7.90 (m, 1H), 7.87 (d,  $J$  = 8.0 Hz, 2H), 7.39 (d,  $J$  = 8.0 Hz, 2H), 7.34–7.33 (m, 1H), 7.24–7.21 (m, 1H), 2.39 (s, 3H);  $^{13}\text{C}$  NMR (101 MHz, DMSO- $d_6$ )  $\delta$  188.4, 145.4, 136.8, 133.4, 132.7, 130.0, 128.3, 127.4, 123.3, 21.4. HRMS (ESI) calcd for  $\text{C}_{12}\text{H}_{11}\text{OS}_2$ : 235.0246 ( $\text{M}+\text{H}^+$ ), found: 235.0238.

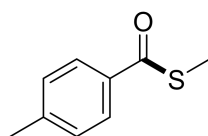

**S-methyl 4-methylbenzothioate (3aj)**<sup>18</sup> (Colorless oil was obtained in 75% isolated yield, 62.3 mg).  $^1\text{H}$  NMR (400 MHz, DMSO- $d_6$ )  $\delta$  7.81 (d,  $J$  = 8.0 Hz, 2H), 7.35 (d,  $J$  = 8.0 Hz, 2H), 2.42 (s, 3H), 2.37 (s, 3H);  $^{13}\text{C}$  NMR (101 MHz, DMSO- $d_6$ )  $\delta$  191.2, 144.4, 134.0, 129.7, 126.9, 21.3, 11.3.

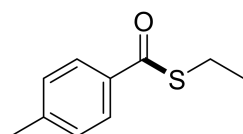

**S-ethyl 4-methylbenzothioate (3ak)**<sup>6</sup> (Colorless oil was obtained in 65% isolated yield, 58.6 mg). <sup>1</sup>H NMR (400 MHz, DMSO-*d*<sub>6</sub>) δ 7.81 (d, *J* = 8.0 Hz, 2H), 7.35 (d, *J* = 8.0 Hz, 2H), 3.04–2.99 (m, 2H), 2.37 (s, 3H), 1.26 (t, *J* = 8.0 Hz, 3H); <sup>13</sup>C NMR (101 MHz, DMSO-*d*<sub>6</sub>) δ 190.8, 144.4, 134.1, 129.7, 126.9, 22.9, 21.3, 14.9.

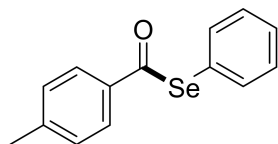

**Se-phenyl 4-methylbenzoselenoate (4a)**<sup>19</sup> (White solid was obtained in 93% isolated yield, 128.5 mg). <sup>1</sup>H NMR (400 MHz, DMSO-*d*<sub>6</sub>) δ 7.80 (d, *J* = 8.0 Hz, 2H), 7.57–7.55 (m, 2H), 7.50–7.42 (m, 3H), 7.38 (d, *J* = 8.0 Hz, 2H), 2.37 (s, 3H); <sup>13</sup>C NMR (101 MHz, DMSO-*d*<sub>6</sub>) δ 191.9, 145.4, 136.3, 135.3, 130.1, 129.6, 129.2, 127.2, 125.5, 21.4.

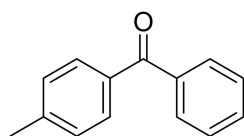

**phenyl(p-tolyl)methanone (5a)**<sup>20</sup> (White solid was obtained in 35% isolated yield). <sup>1</sup>H NMR (400 MHz, CDCl<sub>3</sub>) δ 7.75 (d, *J* = 8.0 Hz, 2H), 7.69 (d, *J* = 8.0 Hz, 2H), 7.52 (t, *J* = 8.0 Hz, 1H), 7.42 (t, *J* = 8.0 Hz, 2H), 7.23 (d, *J* = 8.0 Hz, 2H), 2.38 (s, 3H); <sup>13</sup>C NMR (101 MHz, CDCl<sub>3</sub>) δ 196.2, 143.1, 137.7, 134.7, 132.1, 130.2, 129.8, 128.9, 128.1, 21.5.

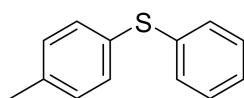

**phenyl(p-tolyl)sulfane (6a)**<sup>21</sup> (Colorless oil was obtained in 48% isolated yield). <sup>1</sup>H NMR (400 MHz, DMSO-*d*<sub>6</sub>) δ 7.29 (d, *J* = 8.0 Hz, 2H), 7.26 - 7.21 (m, 4H), 7.19 - 7.14 (m, 1H), 7.11 (d, *J* = 8.0 Hz, 2H), 2.32 (s, 3H); <sup>13</sup>C NMR (101 MHz, DMSO-*d*<sub>6</sub>) δ 137.7, 137.2, 132.4, 131.4, 130.2, 129.9, 129.1, 126.5, 21.2.

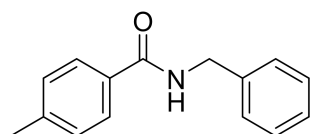

**N-benzyl-4-methylbenzamide (7a)**<sup>22</sup> (White solid was obtained in 76% isolated

yield).  $^1\text{H NMR}$  (400 MHz,  $\text{CDCl}_3$ )  $\delta$  7.67 (d,  $J = 8.0$  Hz, 2H), 7.29–7.27 (m, 4H), 7.26–7.23 (m, 1H), 7.16 (d,  $J = 8.0$  Hz, 2H), 6.80 (s, 1H), 4.56 (d,  $J = 4.0$  Hz, 2H), 2.35 (s, 3H);  $^{13}\text{C NMR}$  (101 MHz,  $\text{CDCl}_3$ )  $\delta$  167.5, 141.9, 138.4, 131.5, 129.2, 128.7, 127.8, 127.4, 127.1, 44.0, 21.5.

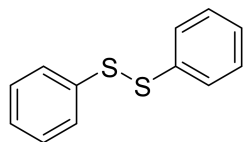

**1,2-diphenyldisulfane (8a)**<sup>23</sup> (White solid was obtained in 73% isolated yield).  $^1\text{H NMR}$  (400 MHz,  $\text{DMSO-}d_6$ )  $\delta$  7.51 (d,  $J = 8.0$  Hz, 4H), 7.35 (t,  $J = 8.0$  Hz, 4H), 7.26 (t,  $J = 8.0$  Hz, 2H);  $^{13}\text{C NMR}$  (101 MHz,  $\text{DMSO-}d_6$ )  $\delta$  135.9, 129.5, 127.5, 127.1.

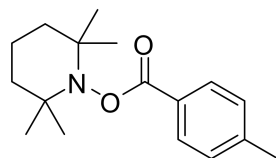

**2,2,6,6-tetramethylpiperidin-1-yl 4-methylbenzoate (9a)** (Colorless oil was obtained).  $^1\text{H NMR}$  (400 MHz,  $\text{DMSO-}d_6$ )  $\delta$  7.84 (d,  $J = 8.0$  Hz, 2H), 7.29 (d,  $J = 8.0$  Hz, 2H), 2.32 (s, 3H), 1.61–1.48 (m, 5H), 1.32 (d,  $J = 12.0$  Hz, 1H), 1.13 (s, 6H), 0.93 (s, 6H);  $^{13}\text{C NMR}$  (101 MHz,  $\text{DMSO-}d_6$ )  $\delta$  165.5, 143.7, 129.6, 129.2, 126.5, 59.8, 38.9, 31.6, 21.3, 20.5, 16.7. HRMS (ESI) calcd for  $\text{C}_{17}\text{H}_{26}\text{NO}_2$ : 276.1958 ( $\text{M}^+\text{H}^+$ ), found: 276.1961.

## References

- (1) Z. J. Qi, Y. Jiang, Y. Y. Wang, and R. L. Yan, *J. Org. Chem.*, **2018**, 83, 8636 – 8644.
- (2) P. Ghosh, B. Ganguly, E. Perl, and S. Da, *Tetrahedron Lett.*, **2017**, 58, 2751 – 2756.
- (3) C. W. Liu, M. Szostak, *Chem. Commun.*, **2018**, 54, 2130 – 2133.
- (4) M. Raj, H. B. Wu, S. L. Blosser, M. A. Vittoria, and P. S. Arora, *J. Am. Chem. Soc.*, **2015**, 137, 6932 – 6940.
- (5) X. B. Zhu, Y. Shi, H. B. Mao, Y. X. Cheng, and C. J. Zhu, *Adv. Synth. Catal.*, **2013**, 355, 3558 – 3562.
- (6) J. B. Azeredo, M. Godoi, R. S. Schwab, G. V. Botteselle, A. L. Braga, *Eur. J. Org. Chem.*, **2013**, 23, 5188 – 5194.
- (7) F. Zhu, J. Rodriguez, S. O'Neill, and M. A. Walczak, *ACS Cent. Sci.*, **2018**, 4, 1652 – 1662.
- (8) M. N. Burhardt, R. H. Taaning, and T. Skrydstrup, *Org. Lett.*, **2013**, 15, 948 – 951.
- (9) H. Cao, L. McNamee, and H. Alper, *J. Org. Chem.*, **2008**, 73, 3530 – 3534.
- (10) M. Kim, S. Yu, J. G. Kim and S. Lee, *Org. Chem. Front.*, **2018**, 5, 2447 – 2452.
- (11) Y. Sato, S. I. Kawaguchi, A. Nomoto, A. Ogawa, *Synthesis* **2017**, 49, 3558 – 3567.
- (12) H. K. Oh, J. Y. Lee, H. W. Leeb and I. Lee, *New J. Chem.*, **2002**, 26, 473 – 476.
- (13) G. Bogonda, D. V. Patil, H. Y. Kim, and K. Oh, *Org. Lett.*, **2019**, 21, 3774 – 3779.
- (14) E. A. Dikumar, N. G. Kozlov, V. I. Potkin, A. P. Yuvchenko, and N. V. Kovganko, *Russ. J. Org. Chem.*, **2004**, 40, 346 – 352.
- (15) A. Jordan and H. F. Sneddon, *Green Chem.*, **2019**, 21, 1900 – 1906.
- (16) B. Zhao, Y. Fu, and R. Shang, *Org. Lett.*, **2019**, 21, 9521 – 9526.
- (17) N. Fattahi, N. Varnaseri and A. Ramazani, *Phosphorus, Sulfur and Silicon and the Related Elements*, **2021**, 196(1), 6 – 12.
- (18) Q. Q. Tian, S. S. Xu, C. Y. Zhang, X. Y. Liu, X. W. Wu, and Y. H. Li, *J. Org. Chem.* **2021**, 86, 8797 – 8804.
- (19) G. Perin, M. B. Silveira, A. M. Barcellos, R. G. Jacoba and D. Alves, *Org. Chem. Front.*, **2015**, 2, 1531 – 1535.
- (20) P. C. Gao and M. Szostak, *Org. Lett.*, **2020**, 22, 6010 – 6015.
- (21) A. Landarani-Isfahani, I. Mohammadpoor-Baltork, V. Mirkhani, M. Moghadam, S.

Tangestaninejad, and H. Amiri Rudbari, *RSC Adv.*, **2020**, *10*, 21198 – 21205.

(22) P. V. Ramachandran and H. J. Hamann, *Org. Lett.*, **2021**, *23*, 2938 – 2942.

(23) N. Yarmohammadi, M. Ghadermazi and R. Mozafari, *RSC Adv.*, **2021**, *11*, 9366 – 9380.

# Copies of $^1\text{H}$ NMR, $^{13}\text{C}$ NMR and $^{19}\text{F}$ NMR spectra

$^1\text{H}$  NMR (400 MHz,  $\text{DMSO-}d_6$ ) of compound **3aa**

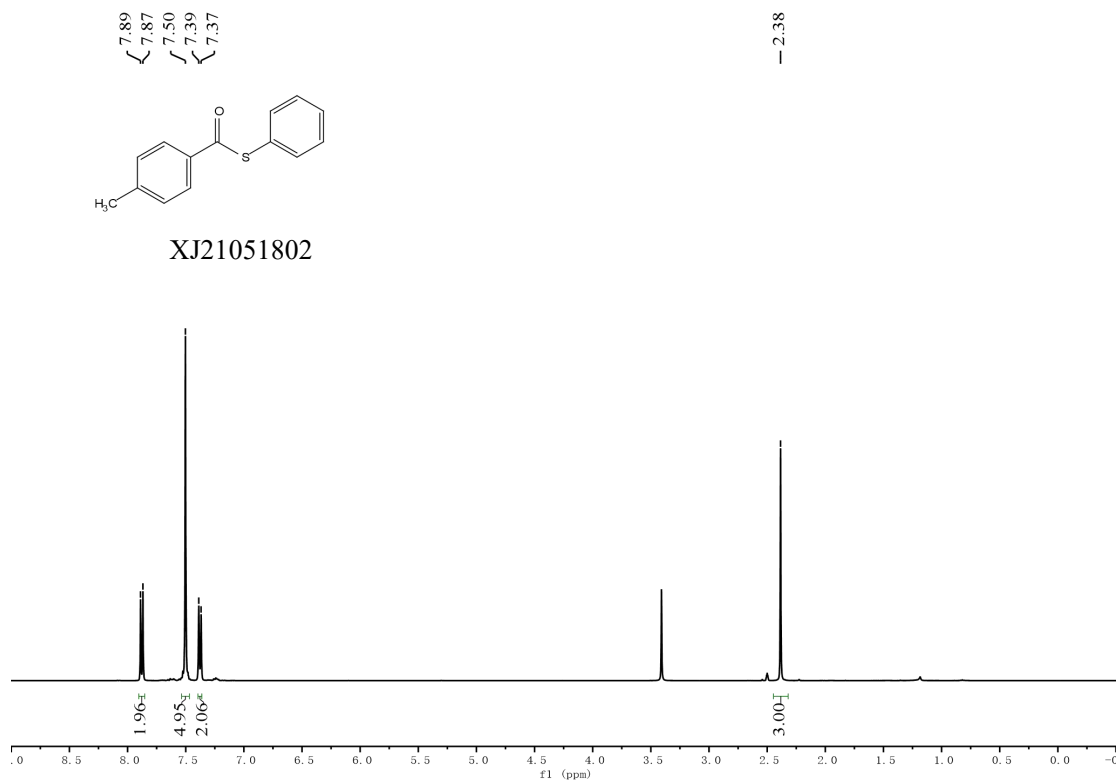

$^{13}\text{C}$  NMR (101 MHz,  $\text{DMSO-}d_6$ ) of compound **3aa**

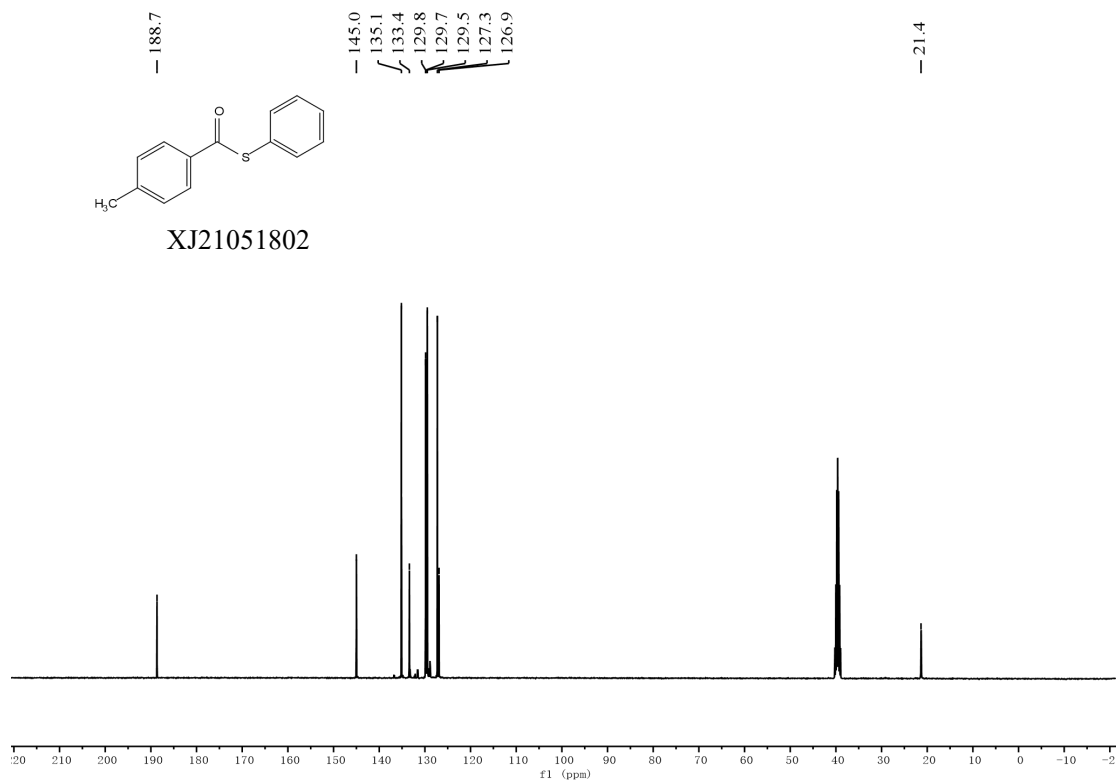



$^1\text{H}$  NMR (400 MHz,  $\text{DMSO-}d_6$ ) of compound **3ba**

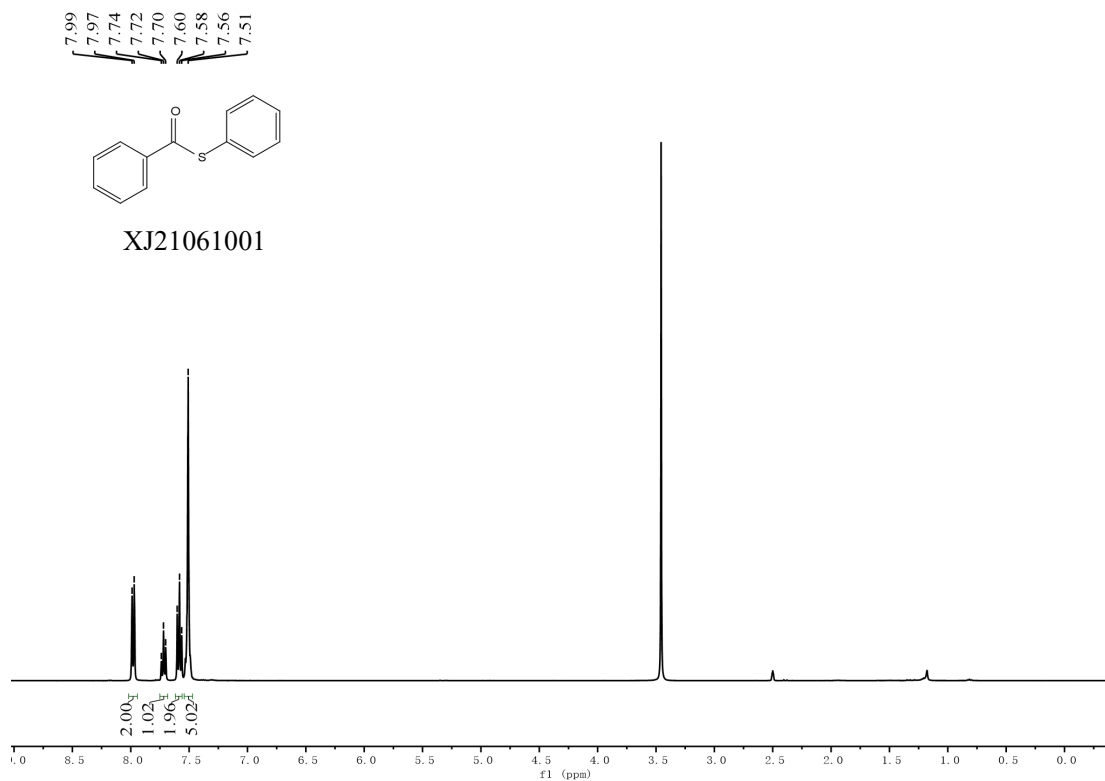

$^{13}\text{C}$  NMR (101 MHz,  $\text{DMSO-}d_6$ ) of compound **3ba**

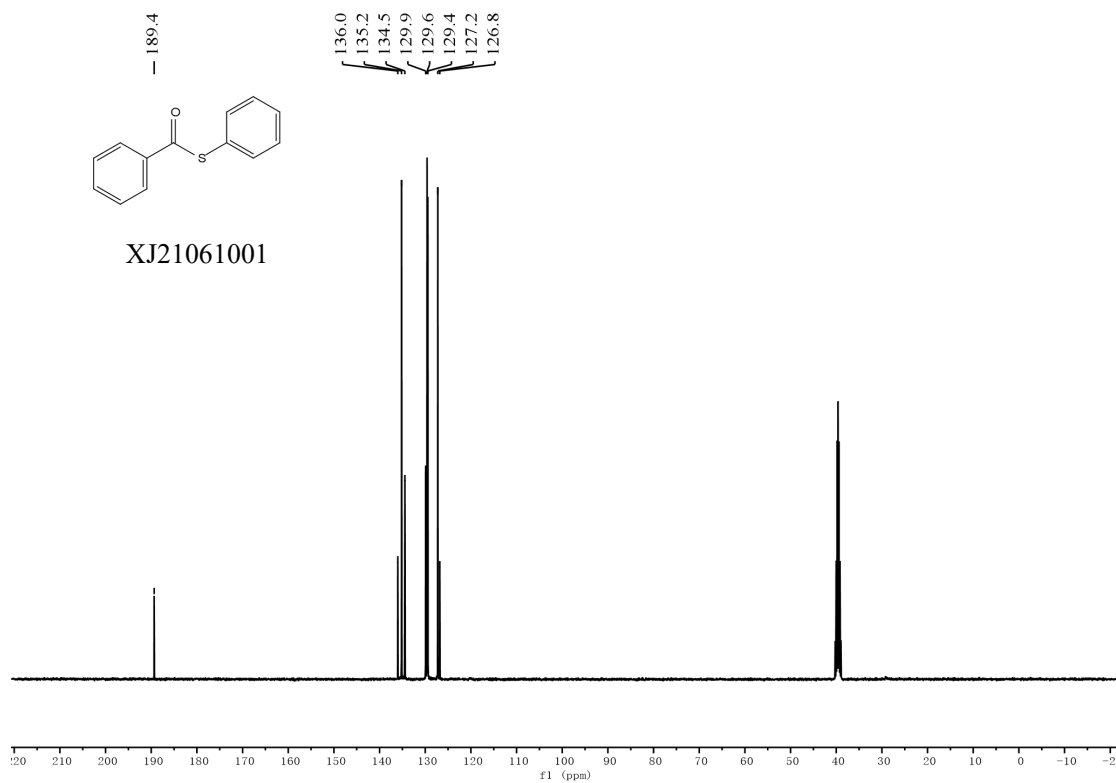

$^1\text{H}$  NMR (400 MHz,  $\text{DMSO-}d_6$ ) of compound **3ca**

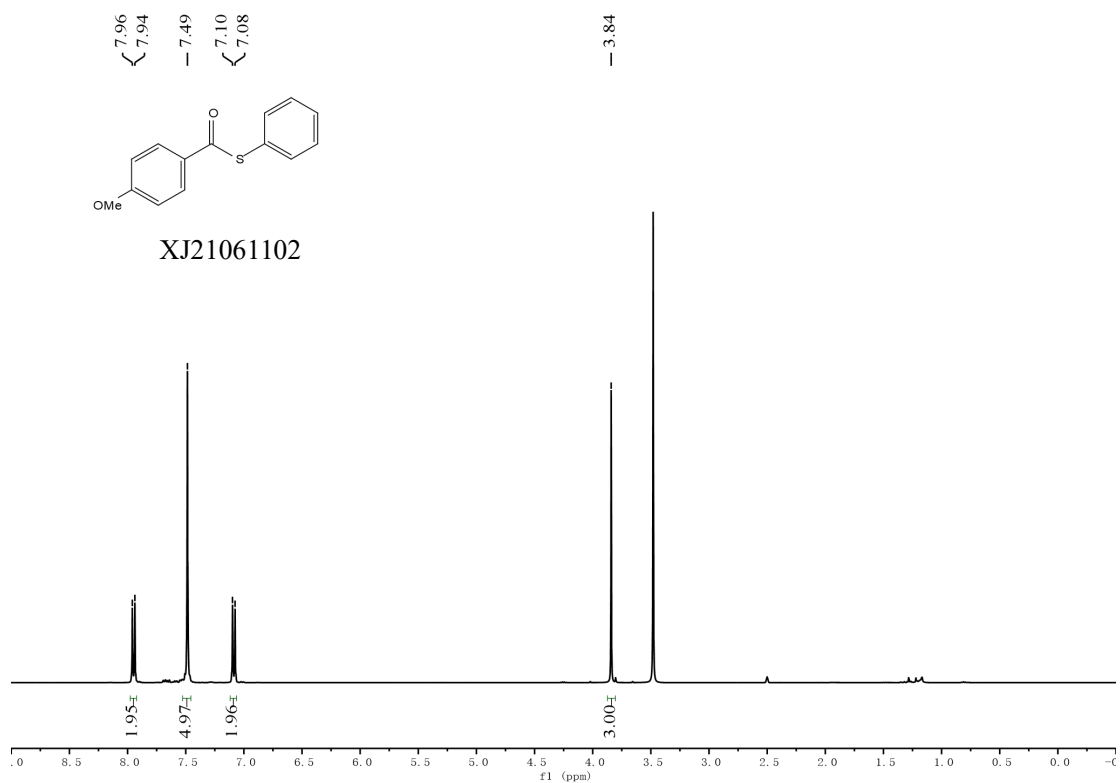

$^{13}\text{C}$  NMR (101 MHz,  $\text{DMSO-}d_6$ ) of compound **3ca**

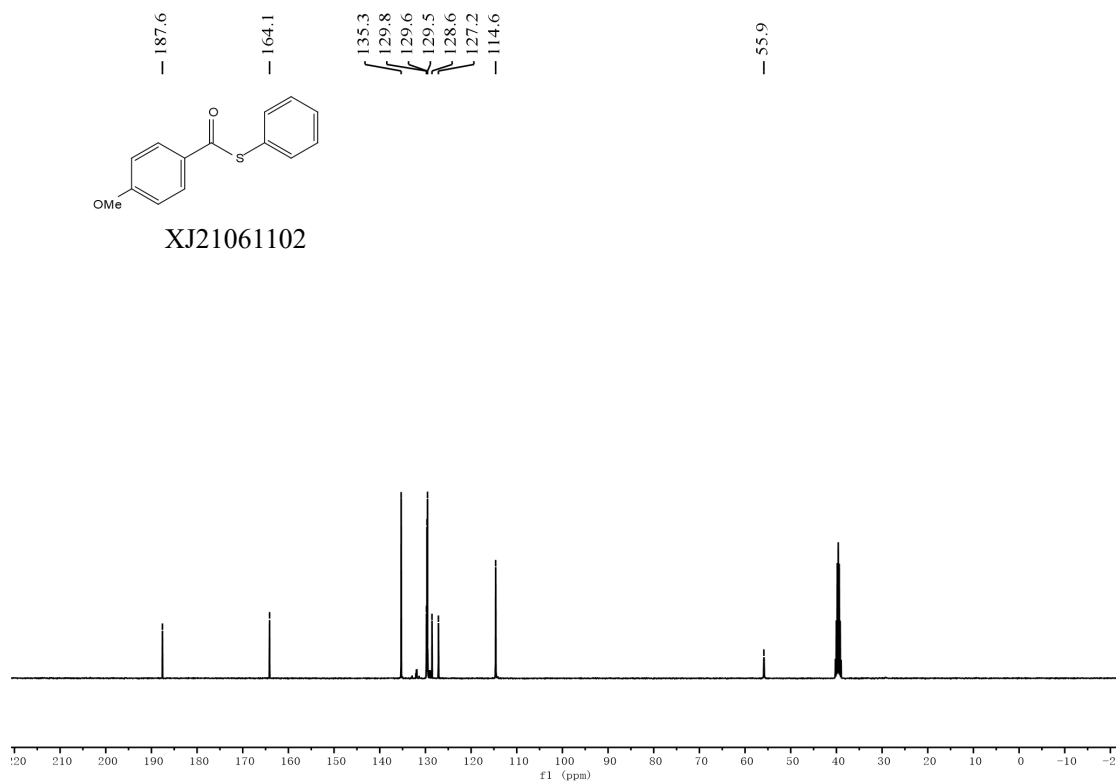

$^1\text{H}$  NMR (400 MHz,  $\text{DMSO}-d_6$ ) of compound **3da**

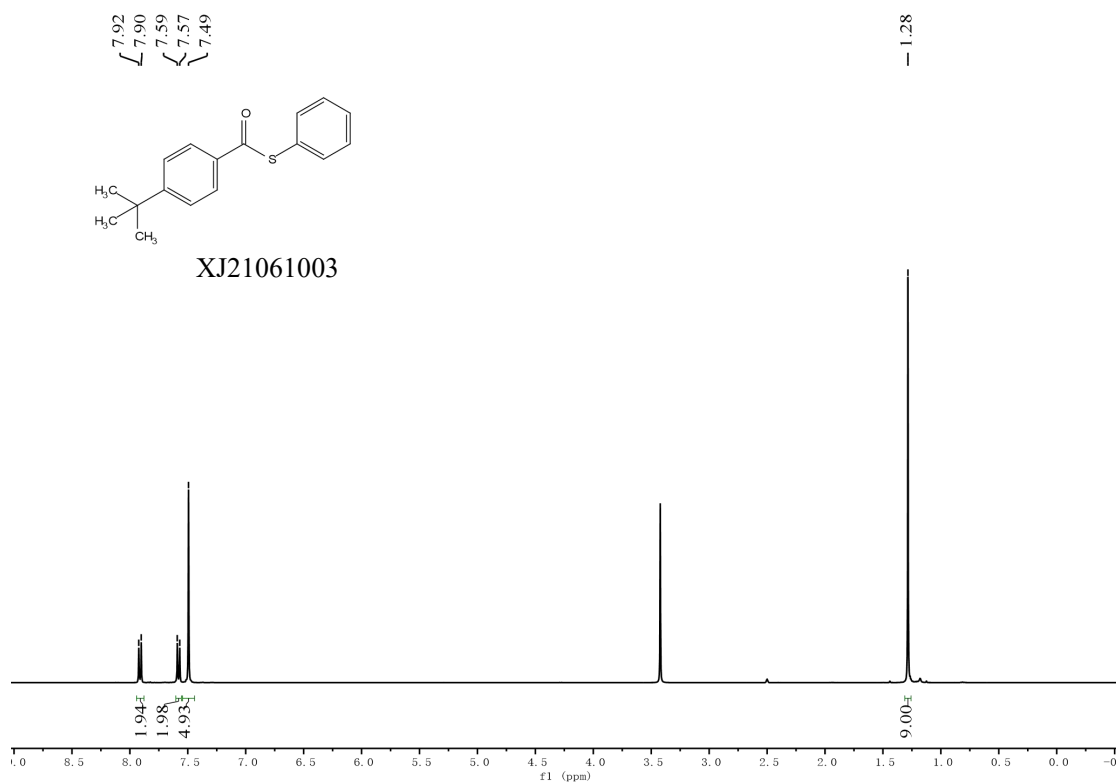

$^{13}\text{C}$  NMR (101 MHz,  $\text{DMSO}-d_6$ ) of compound **3da**

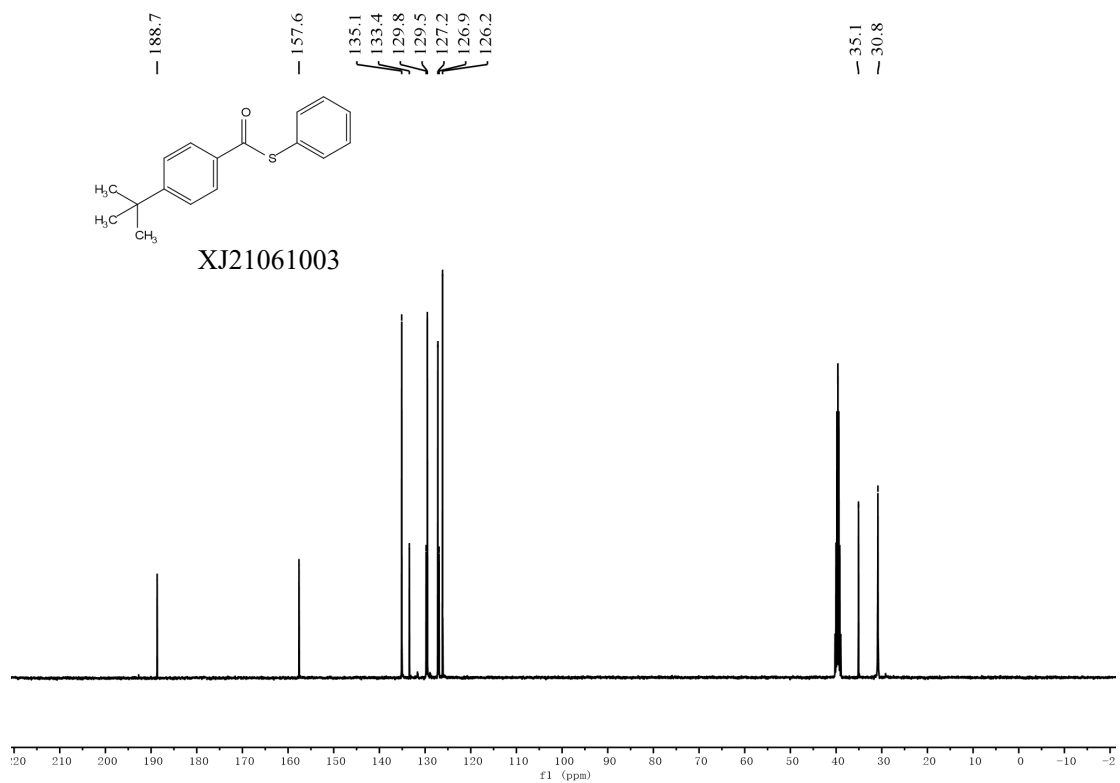

$^1\text{H}$  NMR (400 MHz,  $\text{DMSO-}d_6$ ) of compound **3ea**

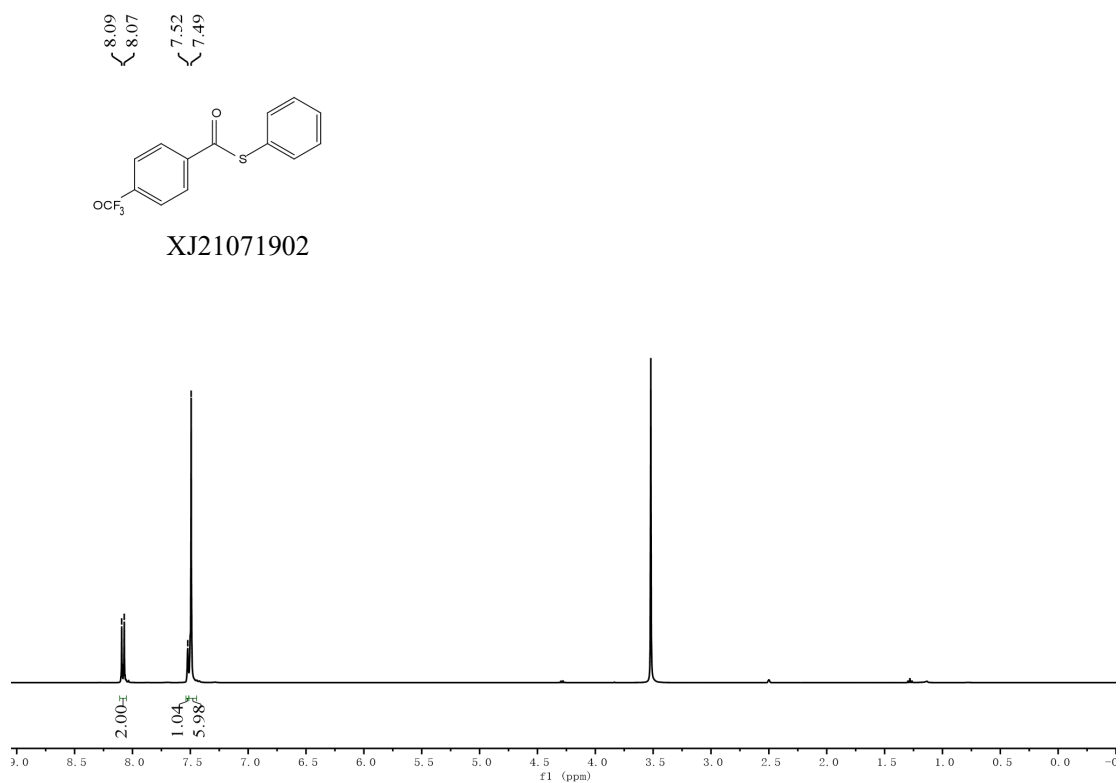

$^{13}\text{C}$  NMR (101 MHz,  $\text{DMSO-}d_6$ ) of compound **3ea**

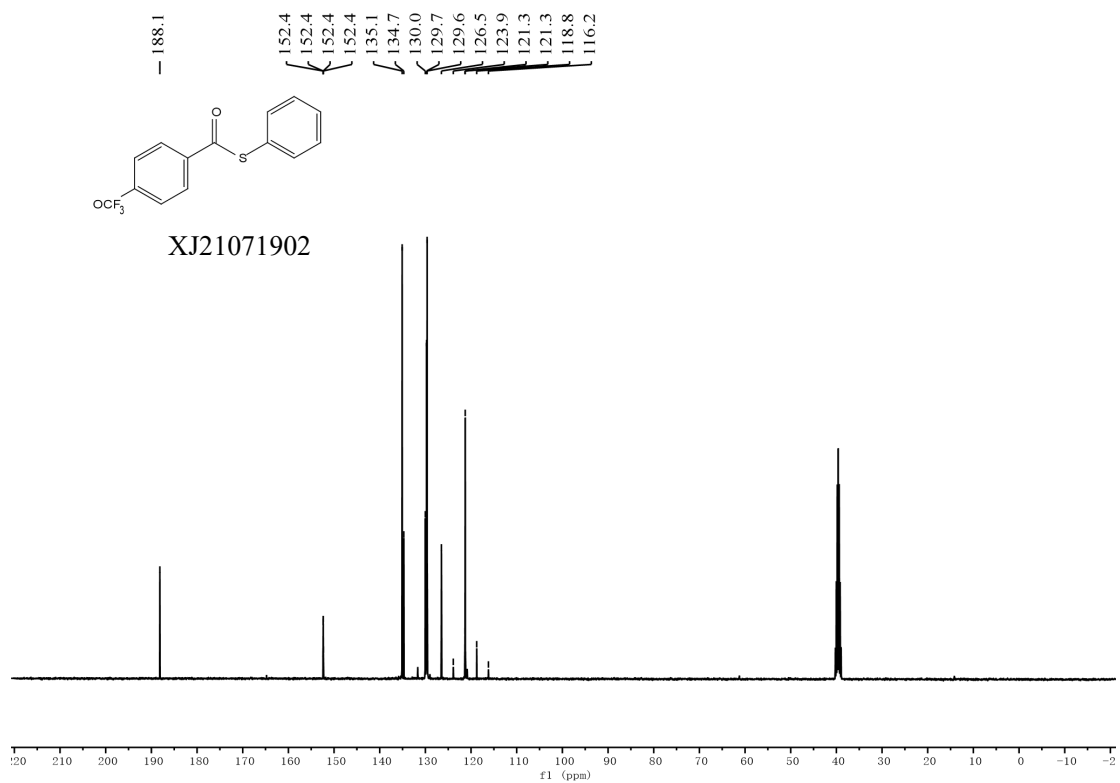

$^{19}\text{F}$  NMR (376 MHz,  $\text{DMSO-}d_6$ ) of compound **3ea**

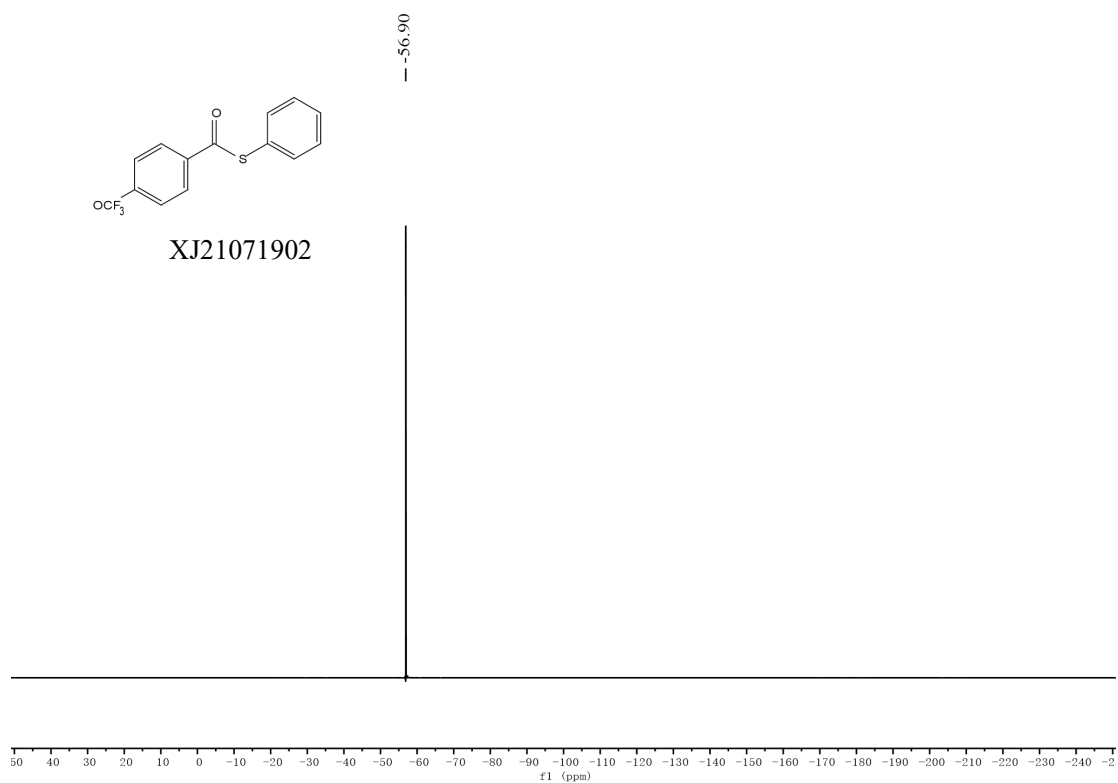

$^1\text{H}$  NMR (400 MHz,  $\text{DMSO-}d_6$ ) of compound **3fa**

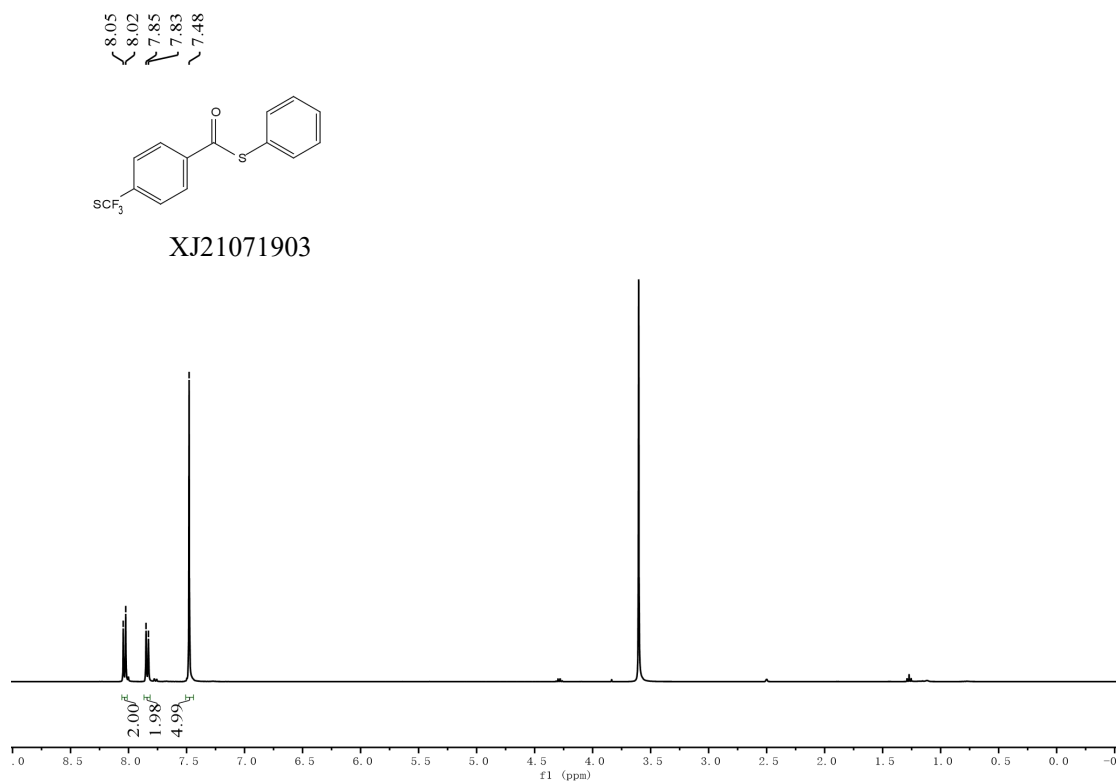

$^{13}\text{C}$  NMR (101 MHz,  $\text{DMSO-}d_6$ ) of compound **3fa**

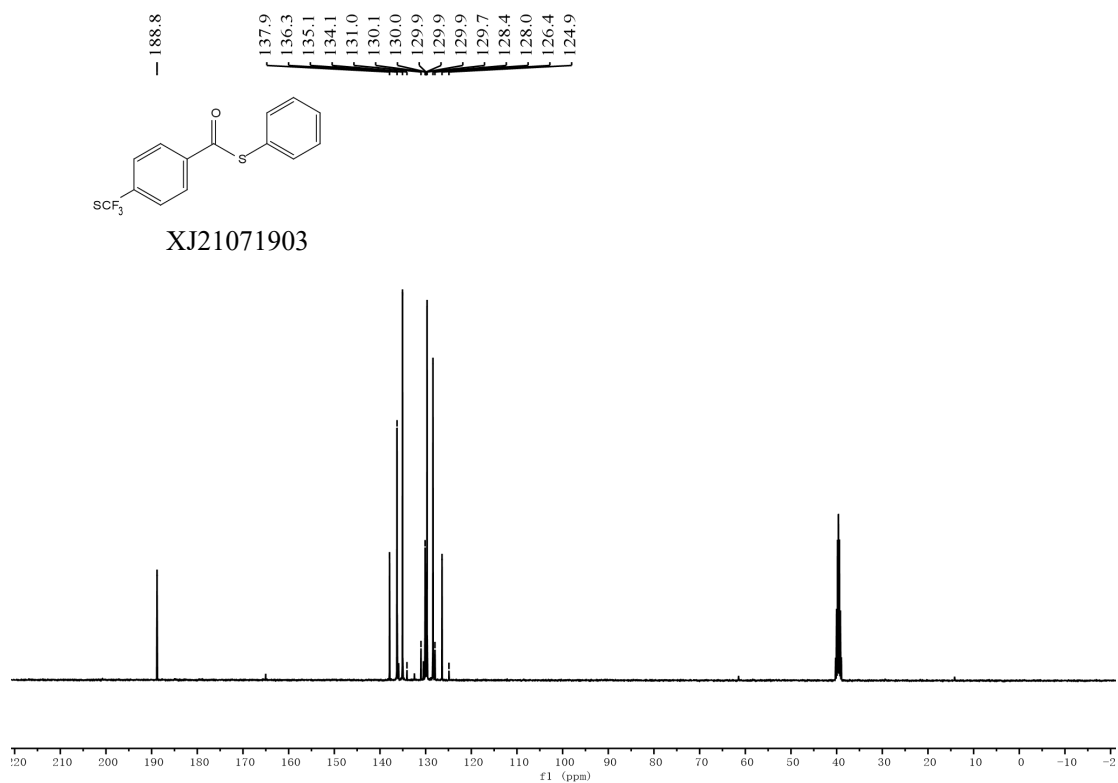

$^{19}\text{F}$  NMR (376 MHz,  $\text{DMSO-}d_6$ ) of compound **3fa**

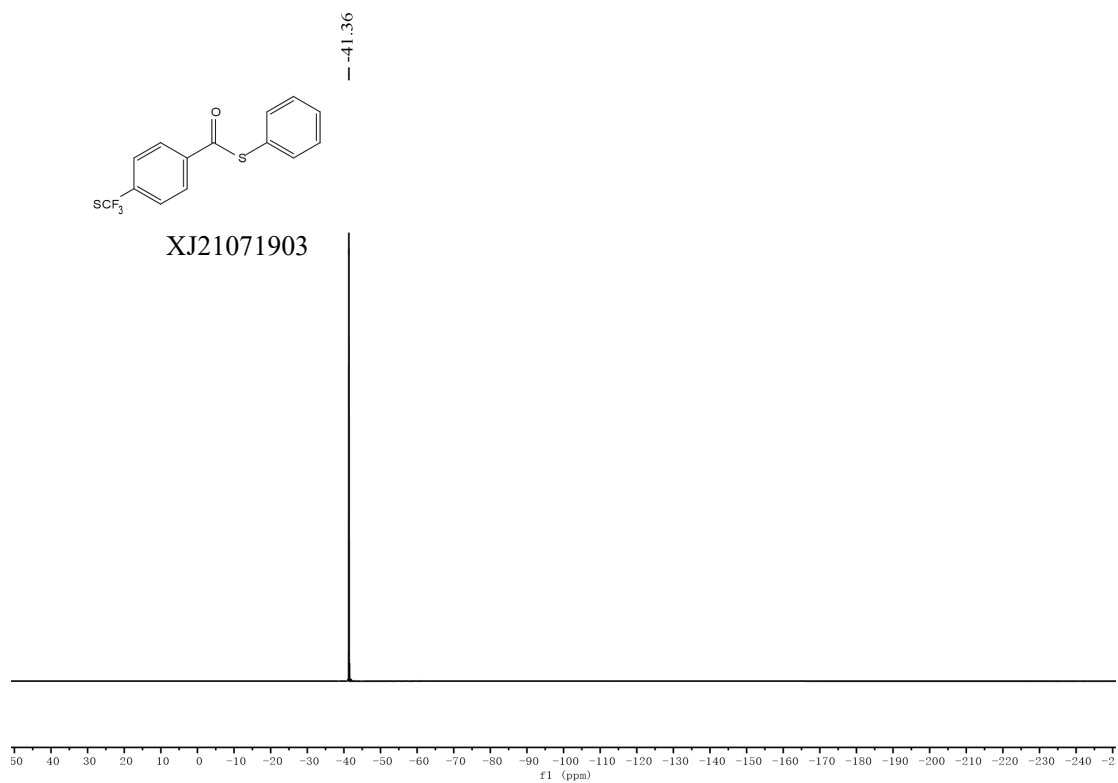

$^1\text{H}$  NMR (400 MHz,  $\text{DMSO-}d_6$ ) of compound **3ga**

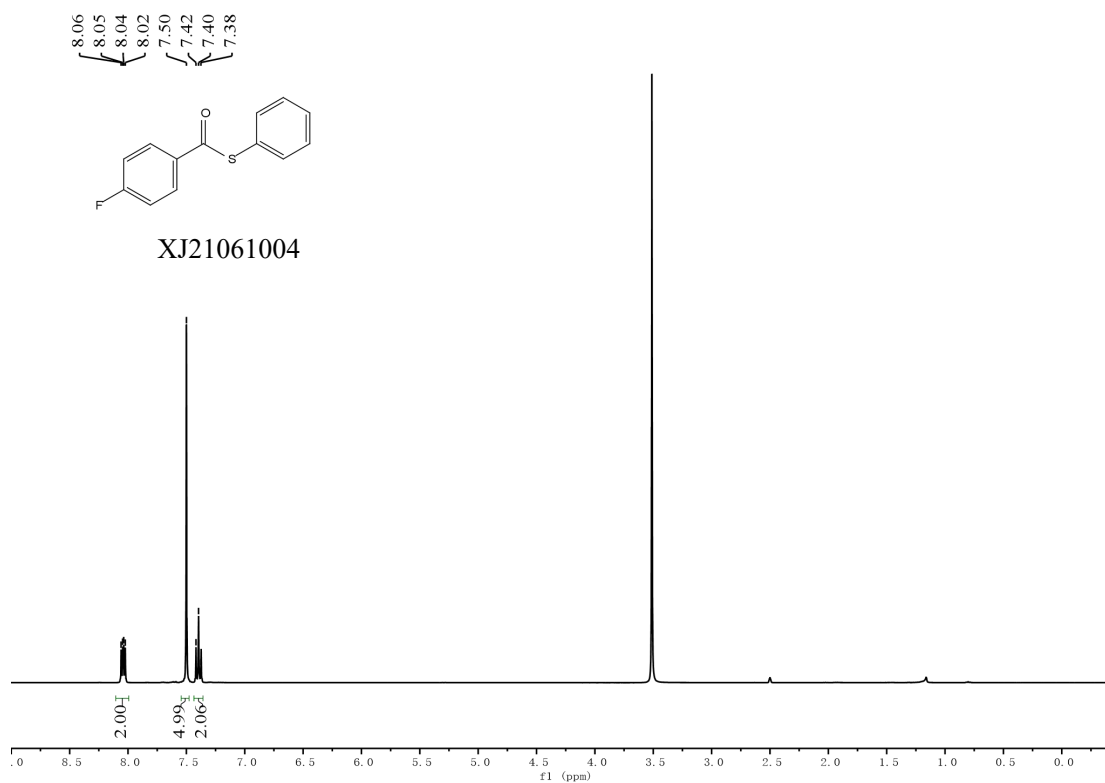

$^{13}\text{C}$  NMR (101 MHz,  $\text{DMSO-}d_6$ ) of compound **3ga**

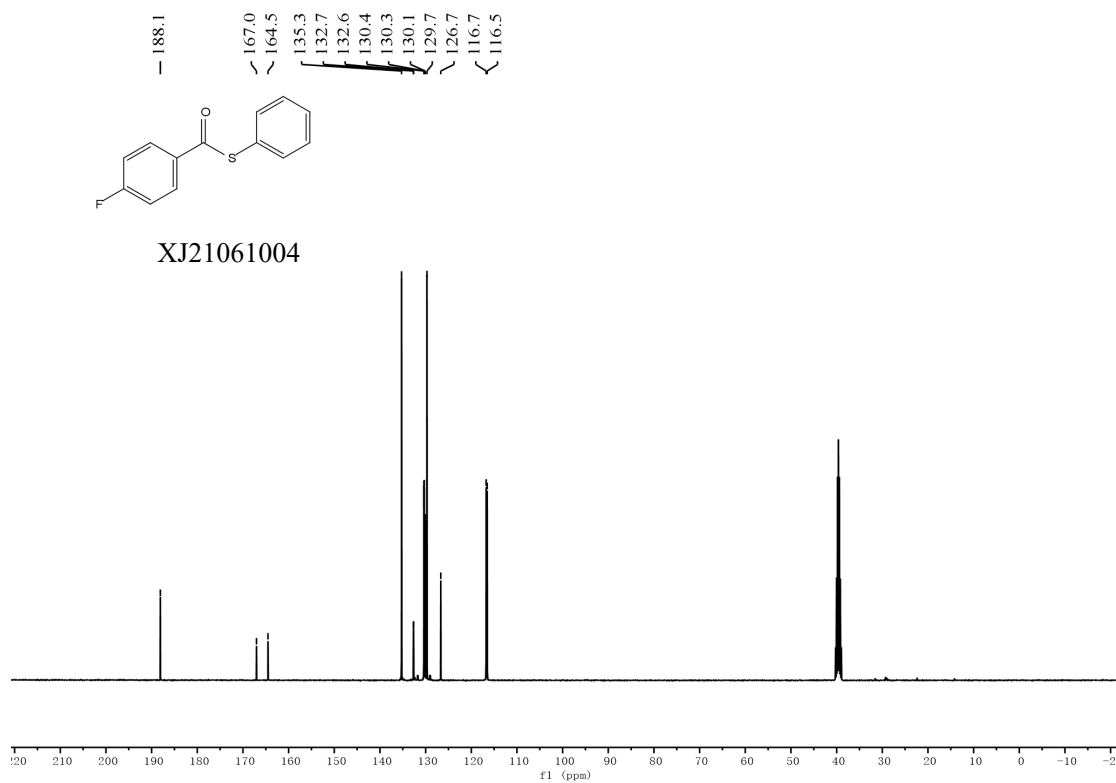

$^{19}\text{F}$  NMR (376 MHz,  $\text{DMSO-}d_6$ ) of compound **3ga**

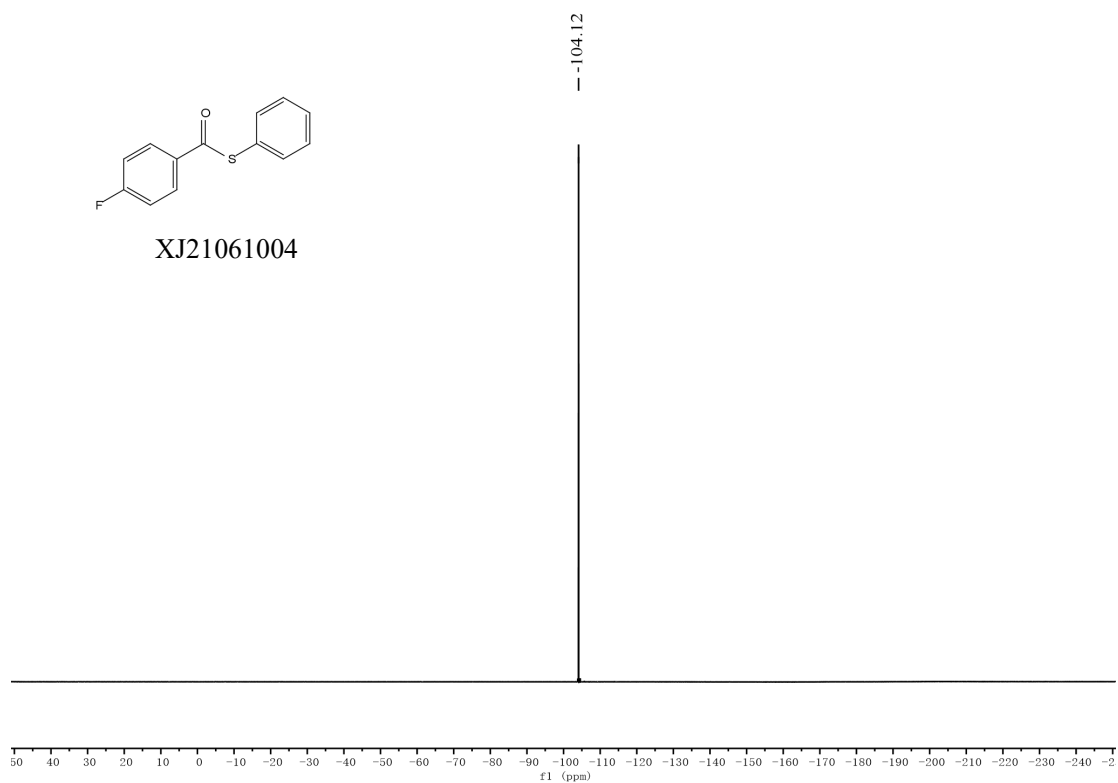

$^1\text{H}$  NMR (400 MHz,  $\text{DMSO-}d_6$ ) of compound **3ha**

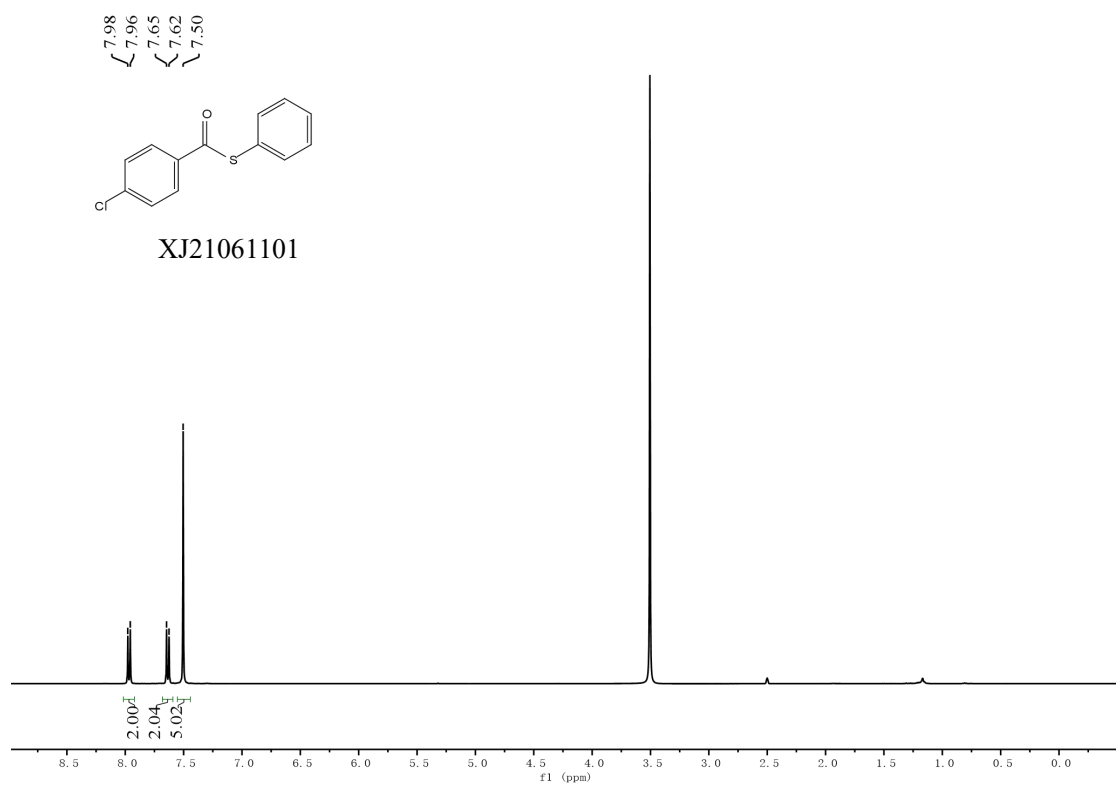



$^{13}\text{C}$  NMR (101 MHz,  $\text{DMSO-}d_6$ ) of compound **3ha**

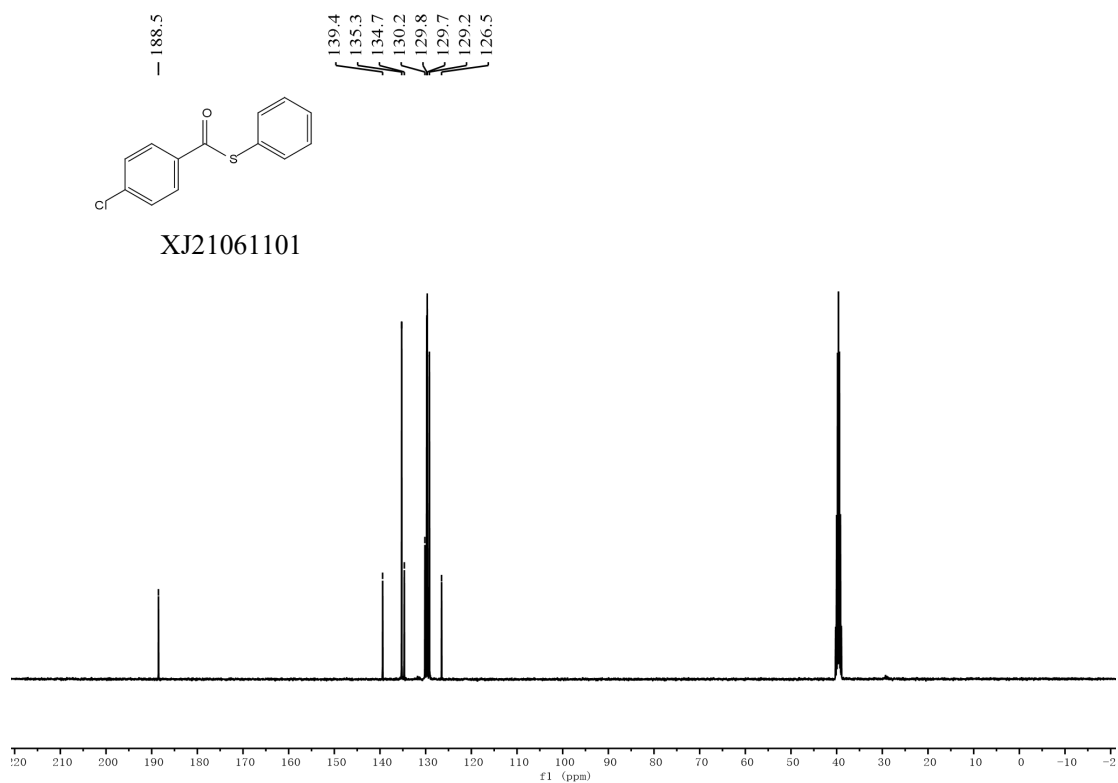

$^1\text{H}$  NMR (400 MHz,  $\text{DMSO-}d_6$ ) of compound **3ia**

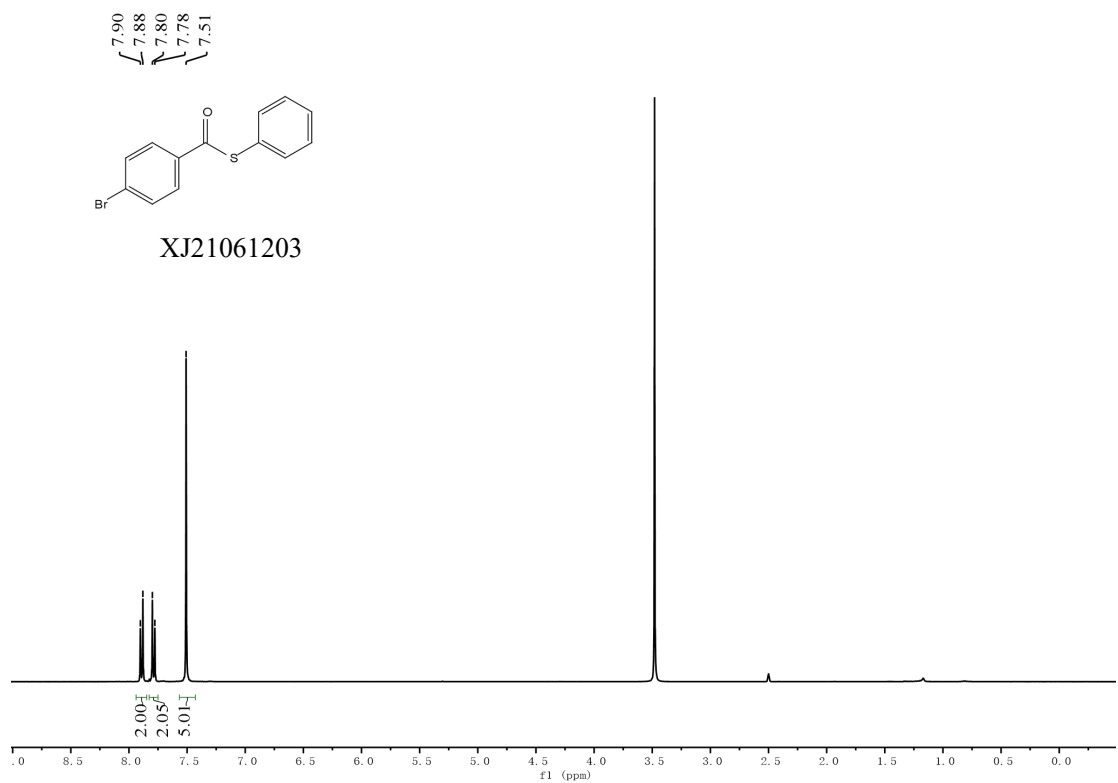

$^{13}\text{C}$  NMR (101 MHz,  $\text{DMSO-}d_6$ ) of compound **3ia**

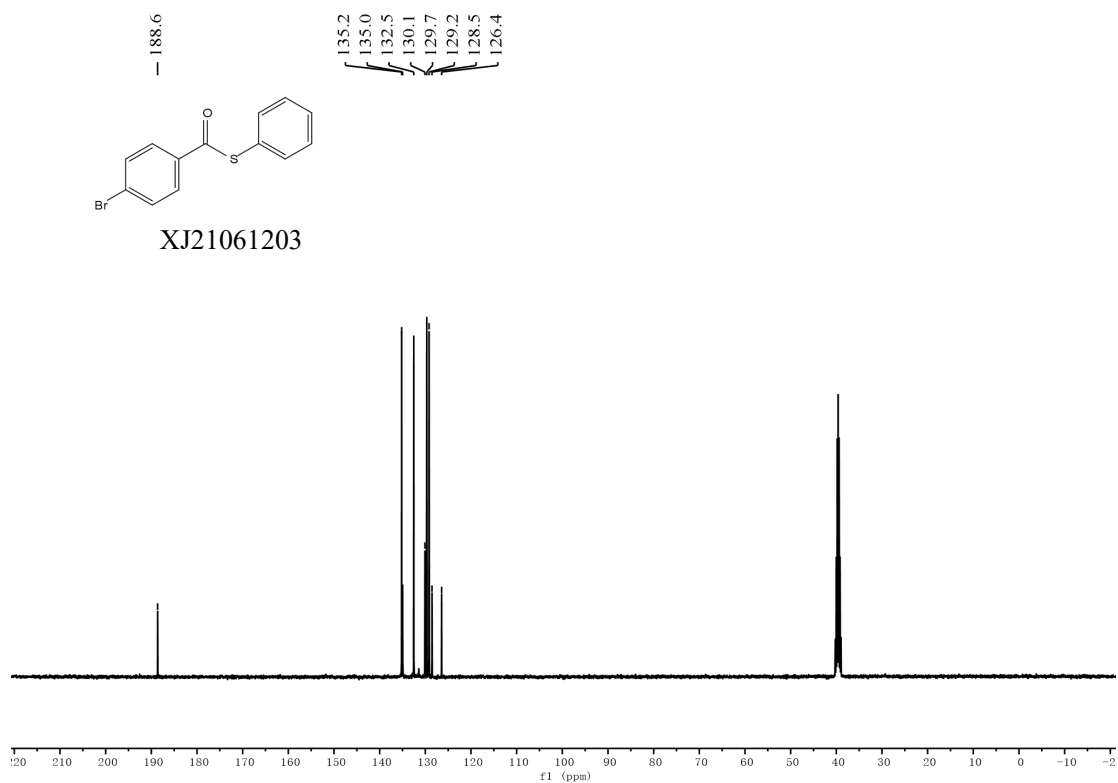

$^1\text{H}$  NMR (400 MHz,  $\text{DMSO-}d_6$ ) of compound **3ja**

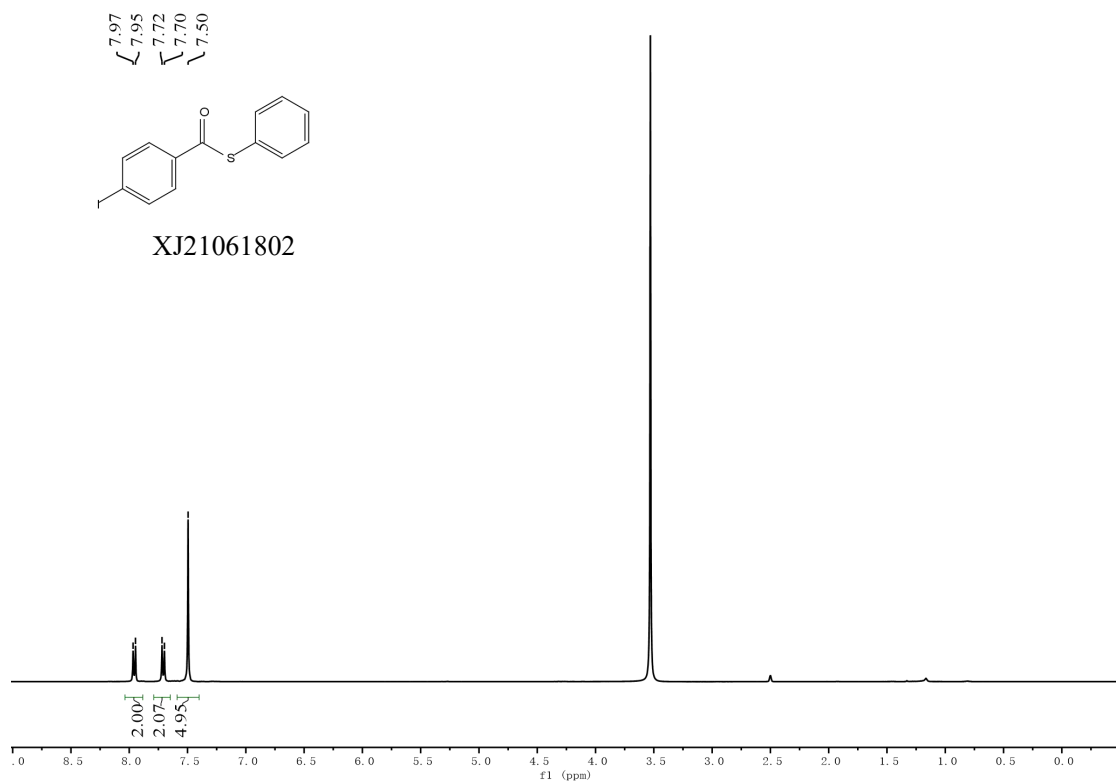

$^{13}\text{C}$  NMR (101 MHz,  $\text{DMSO-}d_6$ ) of compound **3ja**

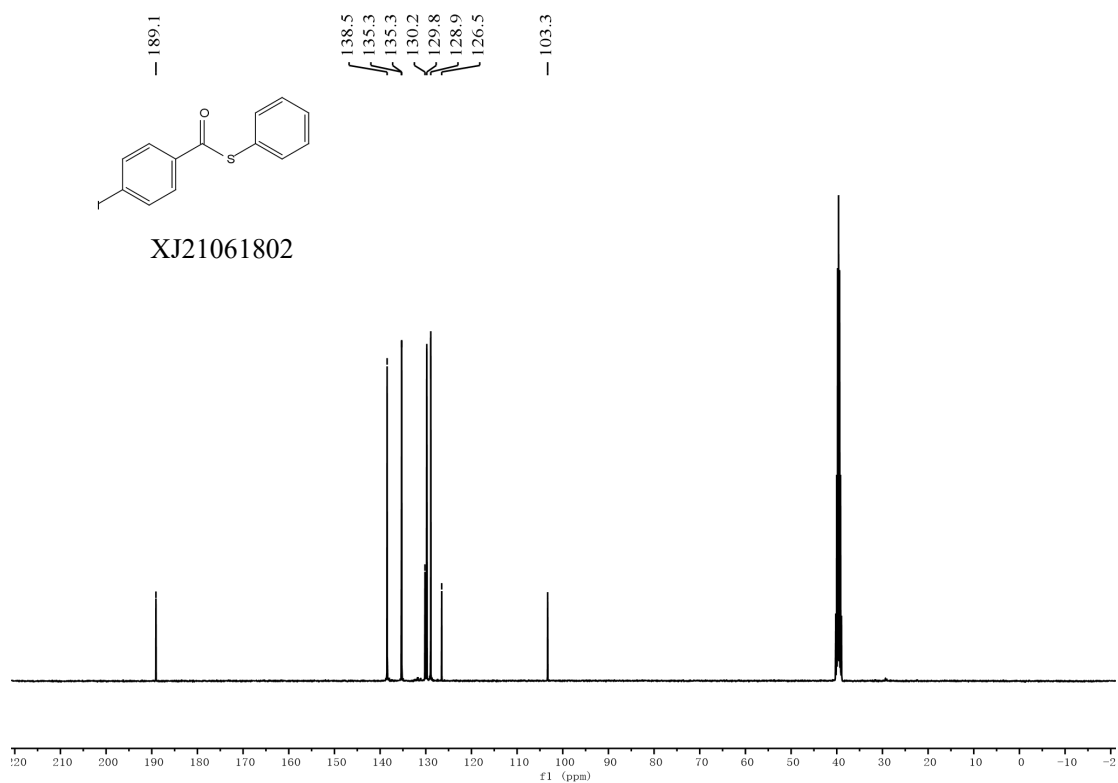

$^1\text{H}$  NMR (400 MHz,  $\text{DMSO-}d_6$ ) of compound **3ka**

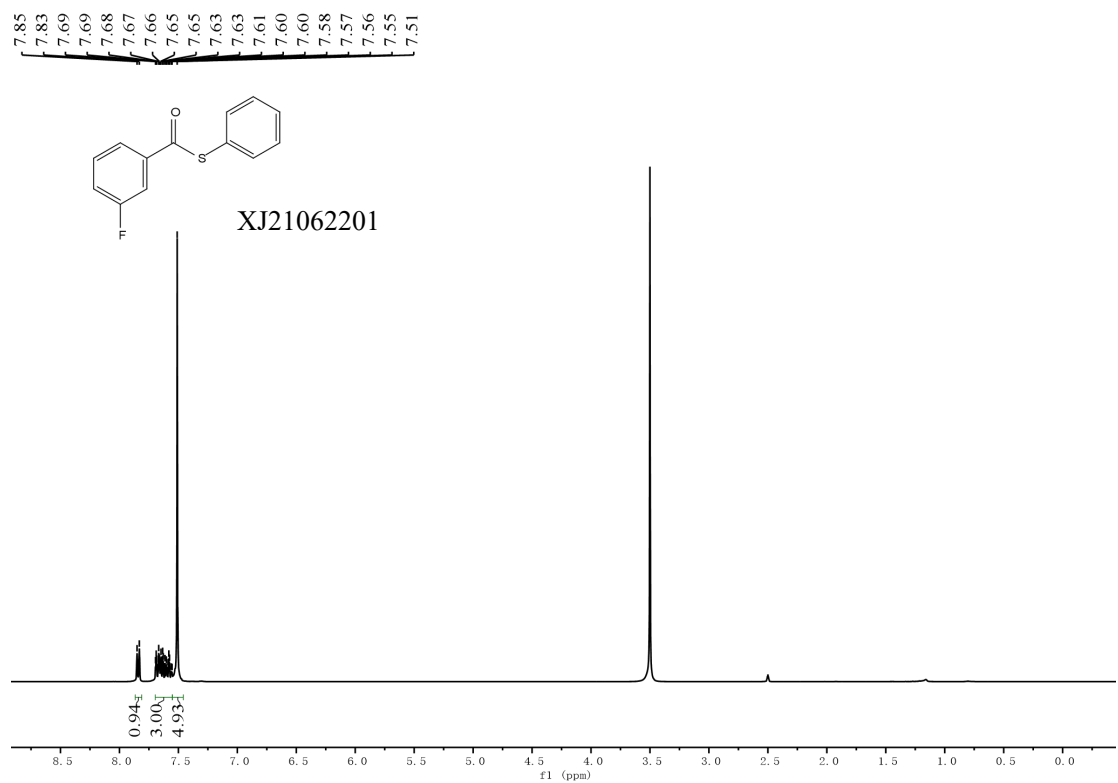

<sup>13</sup>C NMR (101 MHz, DMSO-*d*<sub>6</sub>) of compound **3ka**

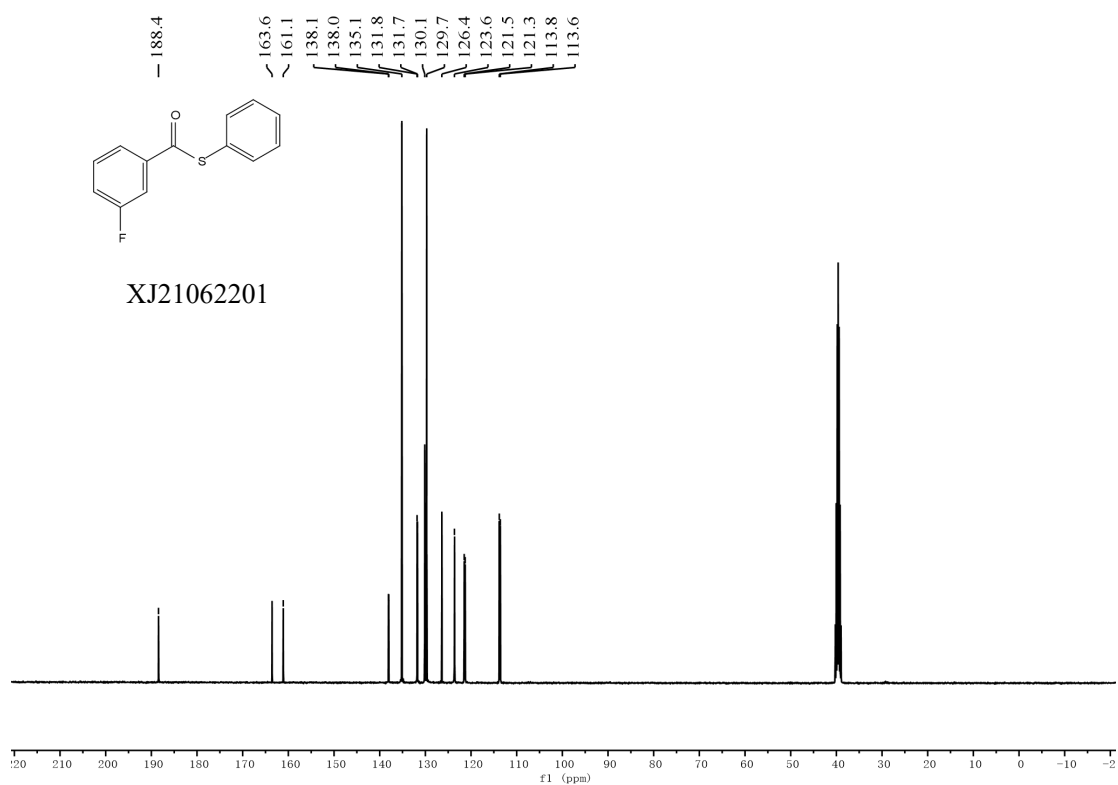

<sup>19</sup>F NMR (376 MHz, DMSO-*d*<sub>6</sub>) of compound **3ka**

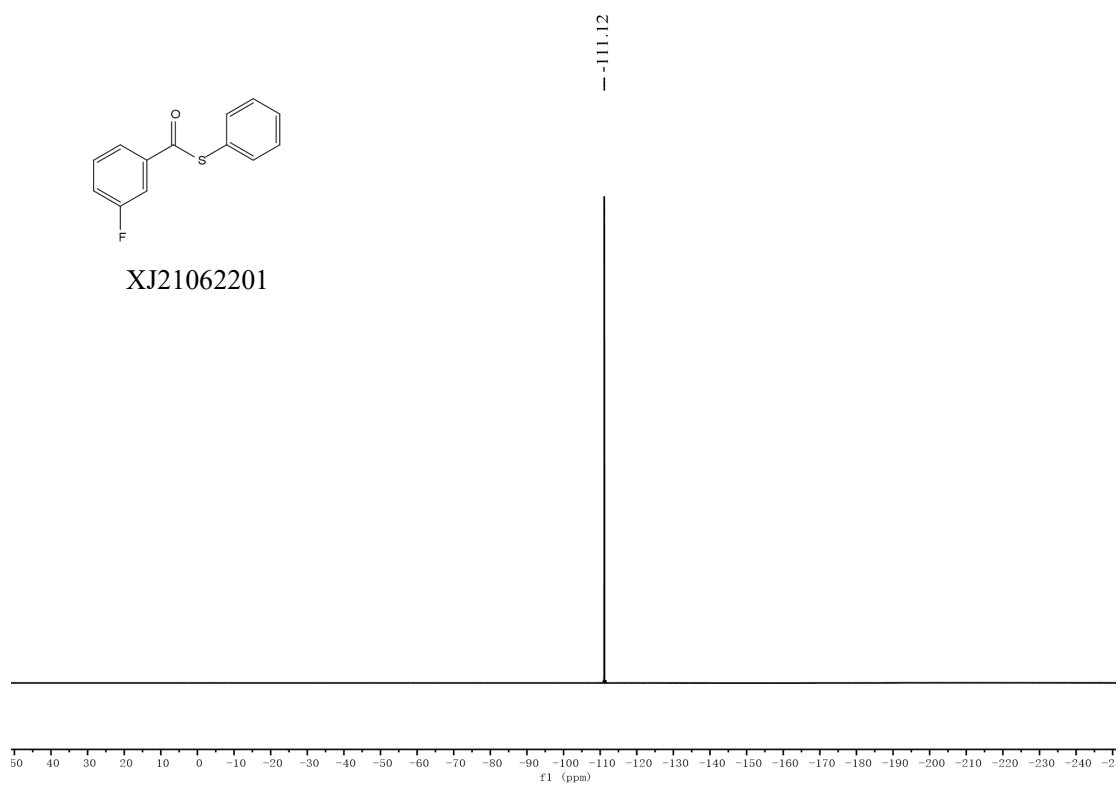

$^1\text{H}$  NMR (400 MHz,  $\text{DMSO-}d_6$ ) of compound **3la**

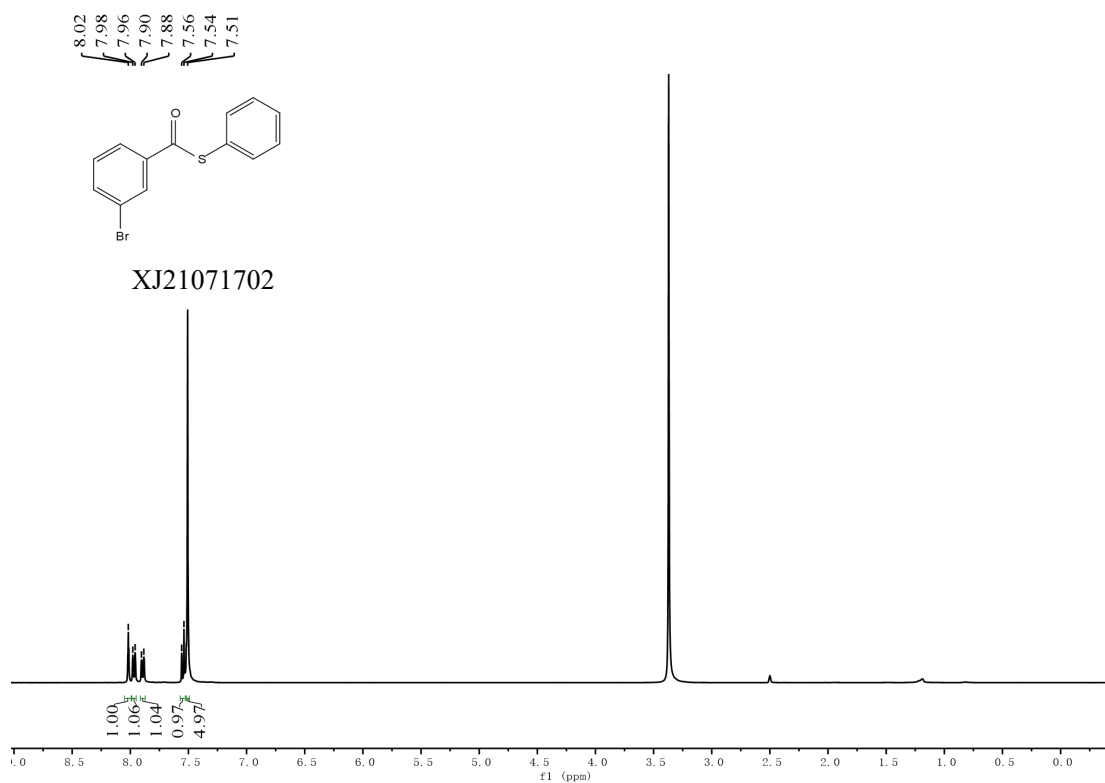

$^{13}\text{C}$  NMR (101 MHz,  $\text{DMSO-}d_6$ ) of compound **3la**

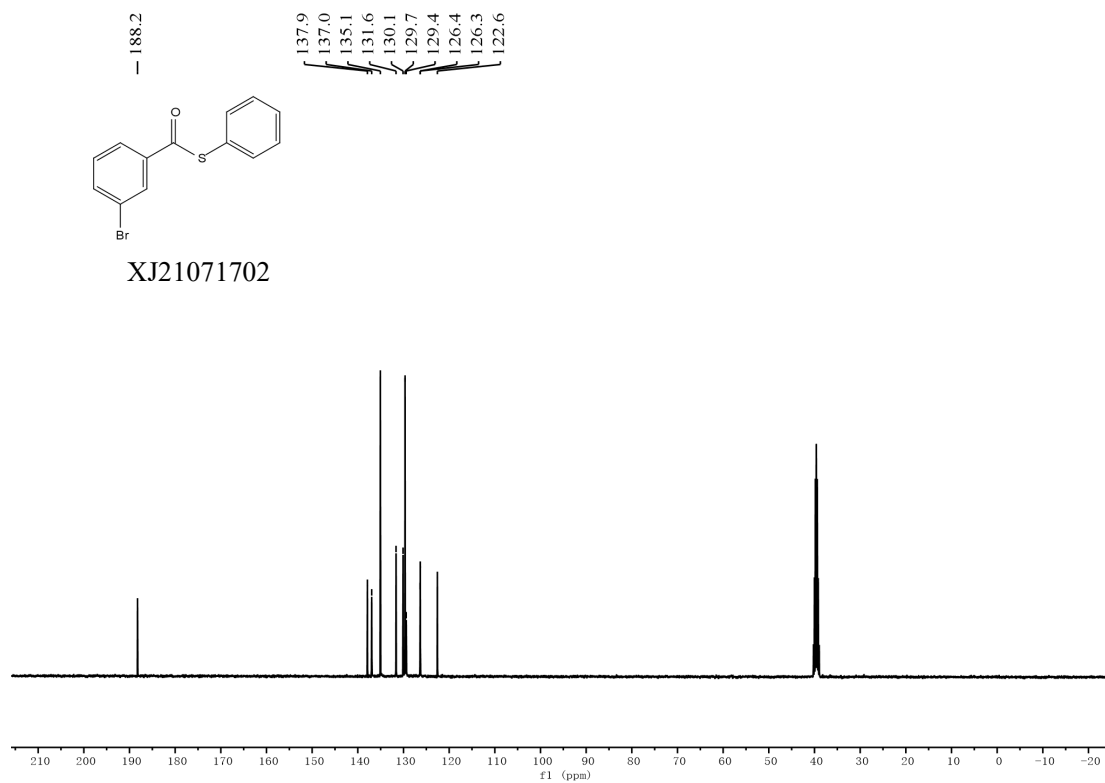

$^1\text{H}$  NMR (400 MHz,  $\text{DMSO-}d_6$ ) of compound **3ma**

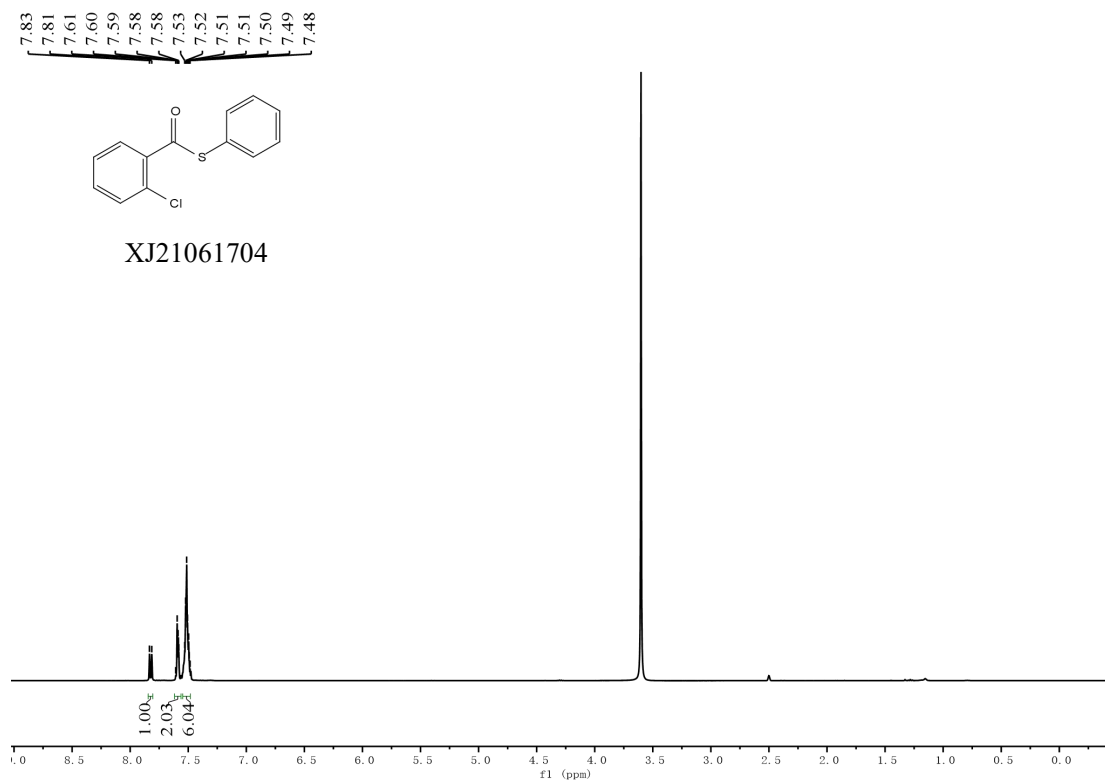

$^{13}\text{C}$  NMR (101 MHz,  $\text{DMSO-}d_6$ ) of compound **3ma**

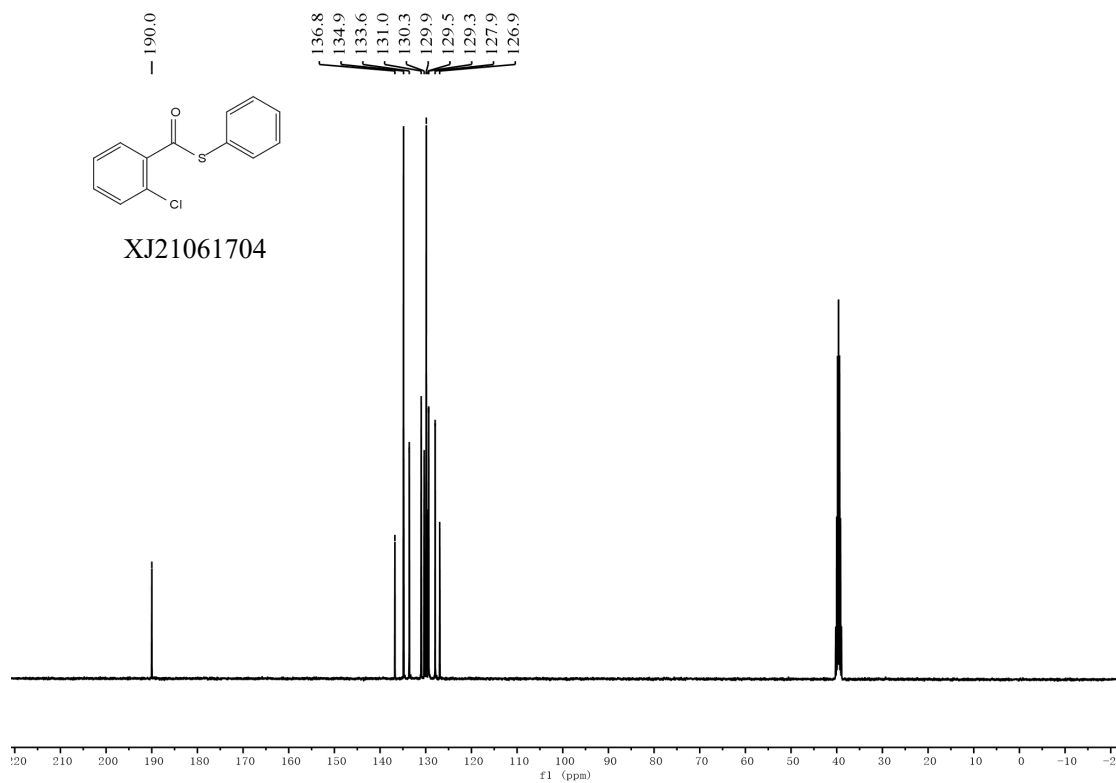

$^1\text{H}$  NMR (400 MHz,  $\text{DMSO-}d_6$ ) of compound **3na**

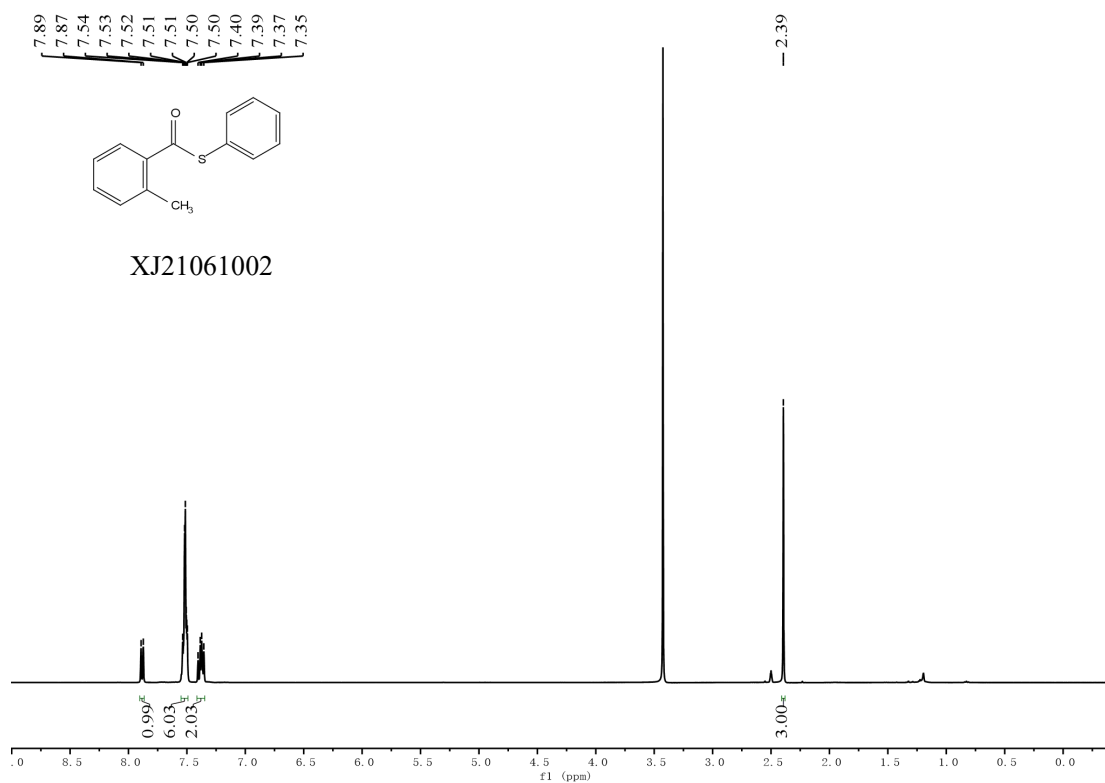

$^{13}\text{C}$  NMR (101 MHz,  $\text{DMSO-}d_6$ ) of compound **3na**

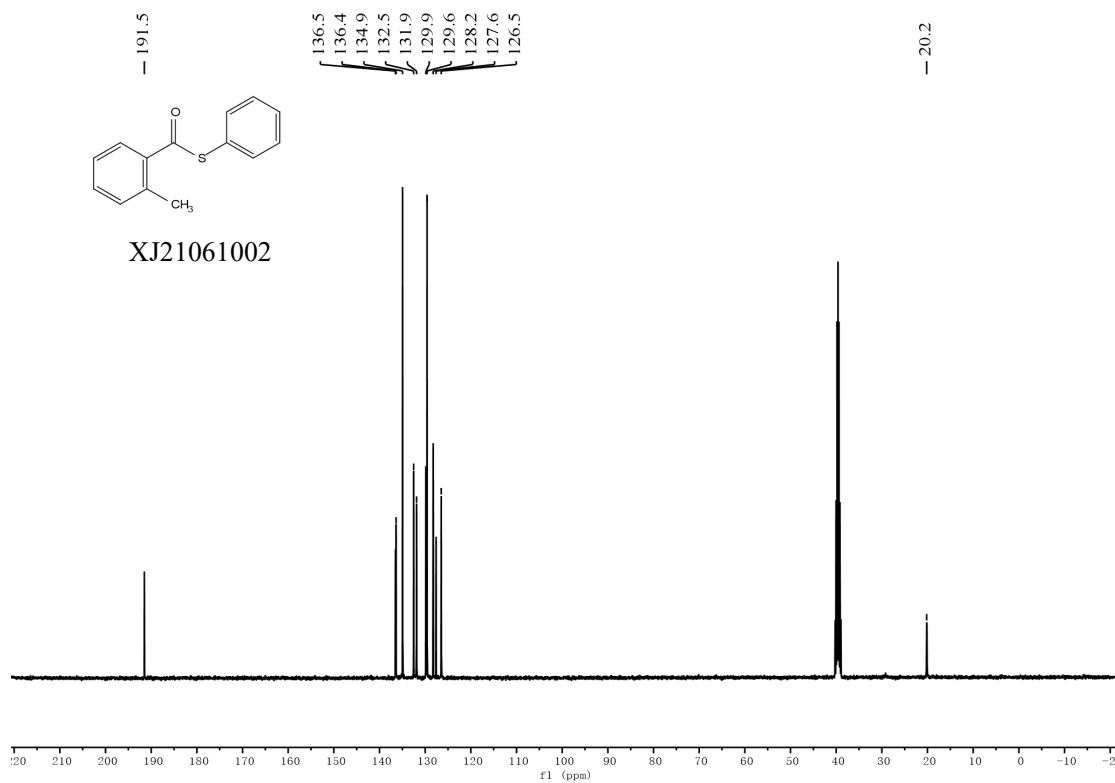

$^1\text{H}$  NMR (400 MHz,  $\text{DMSO-}d_6$ ) of compound **30a**

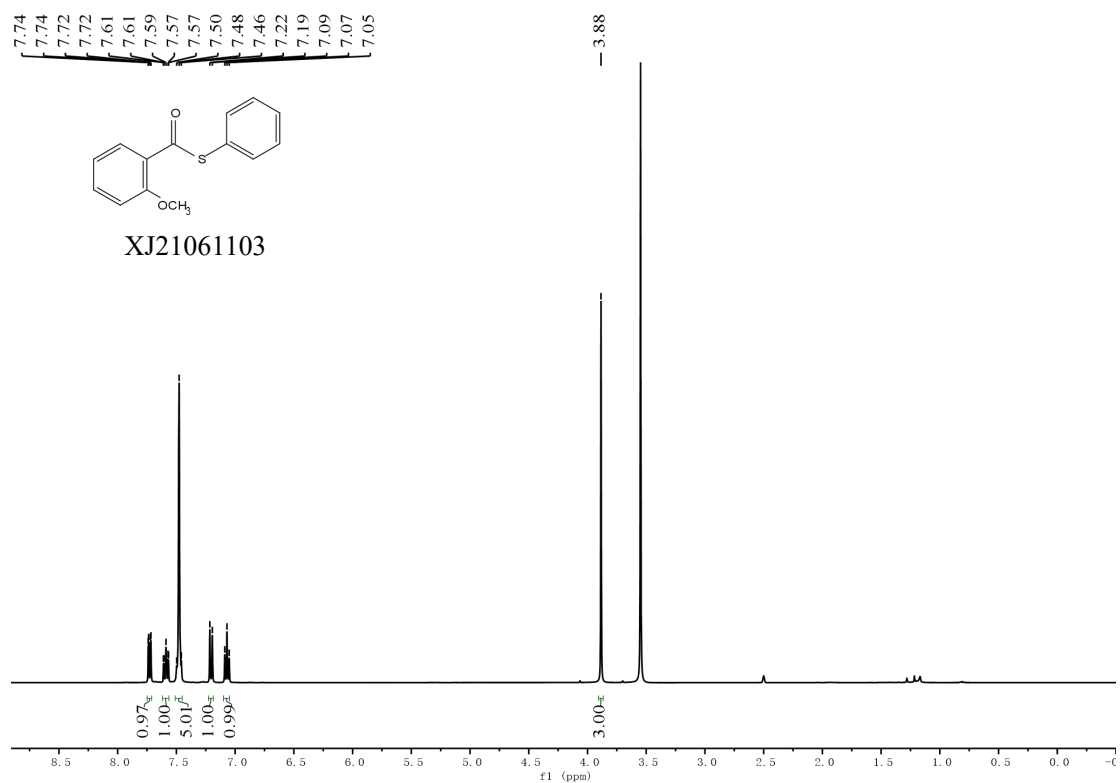

$^{13}\text{C}$  NMR (101 MHz,  $\text{DMSO-}d_6$ ) of compound **30a**

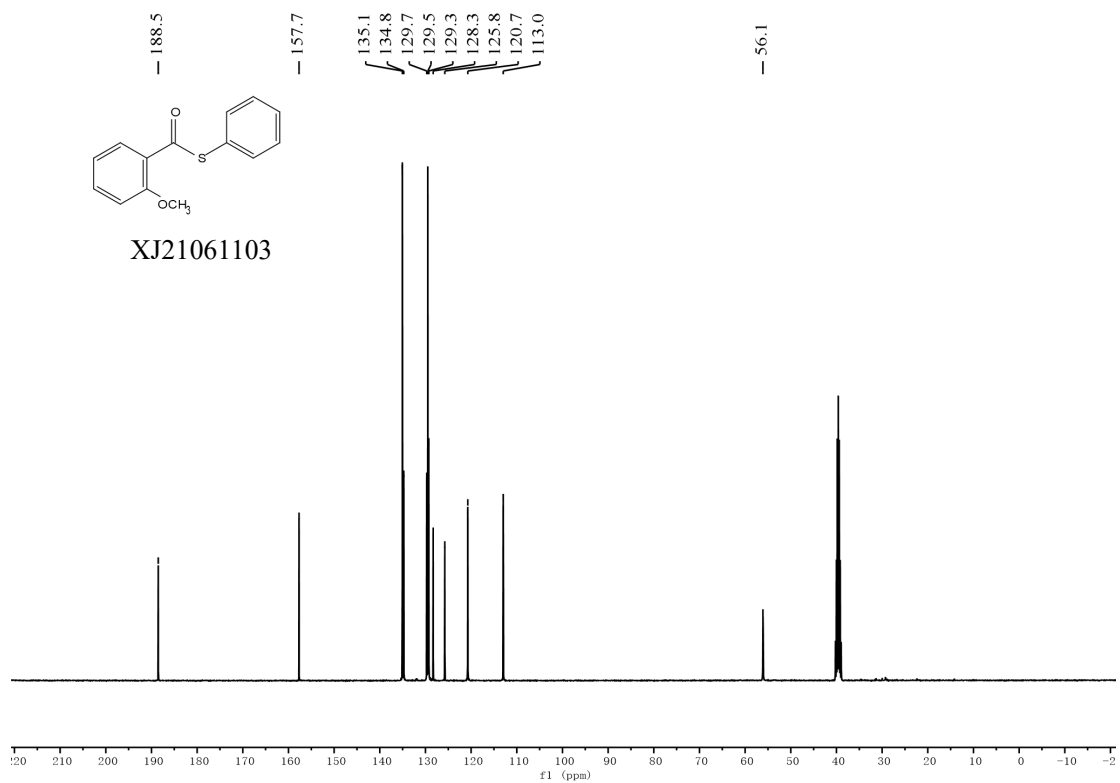



$^1\text{H}$  NMR (400 MHz,  $\text{DMSO-}d_6$ ) of compound **3pa**

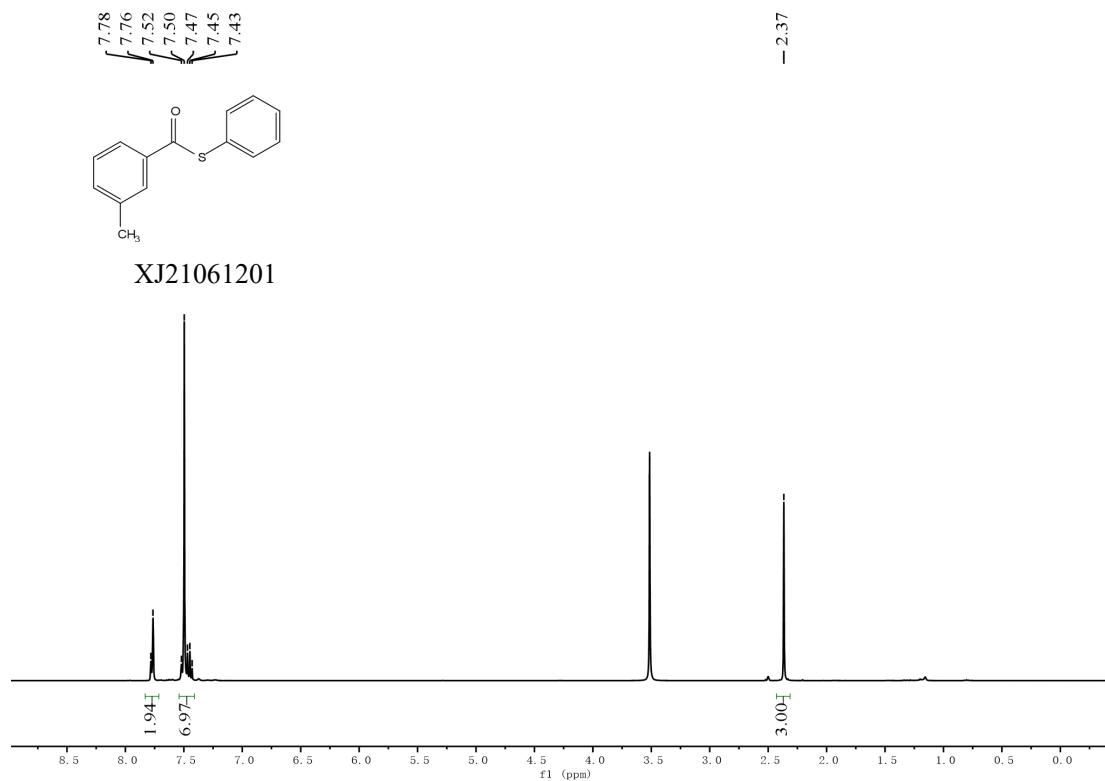

$^{13}\text{C}$  NMR (101 MHz,  $\text{DMSO-}d_6$ ) of compound **3pa**

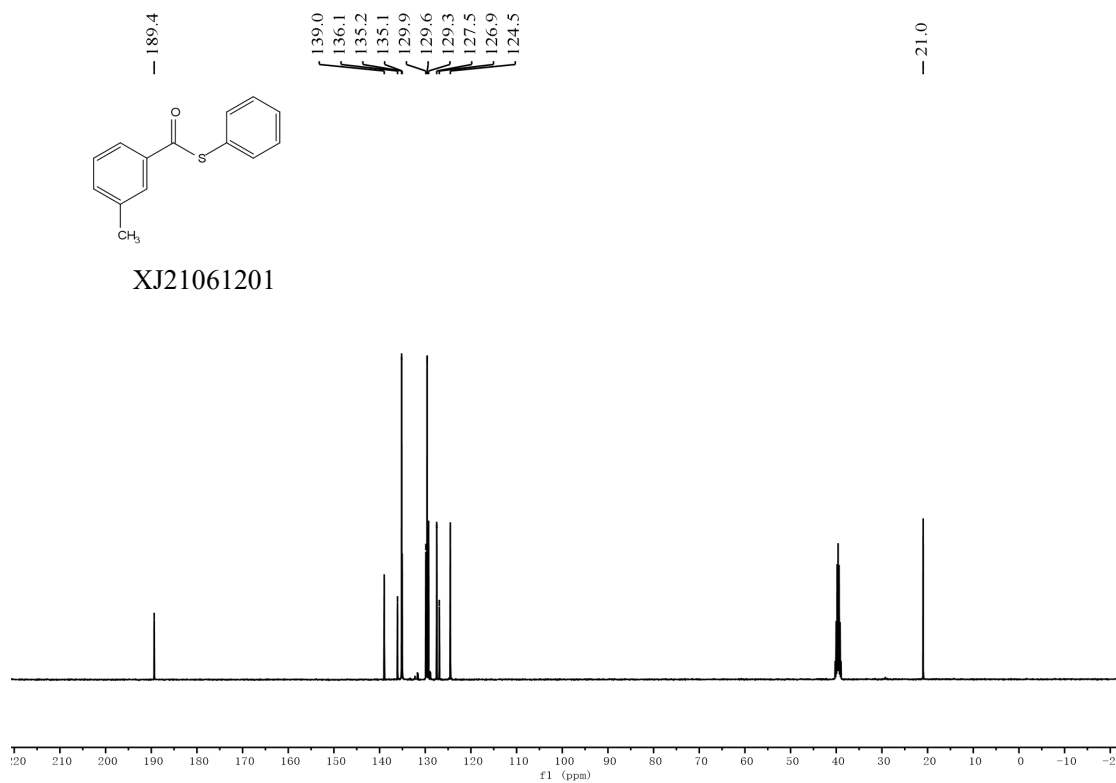

$^1\text{H}$  NMR (400 MHz,  $\text{DMSO}-d_6$ ) of compound **3qa**

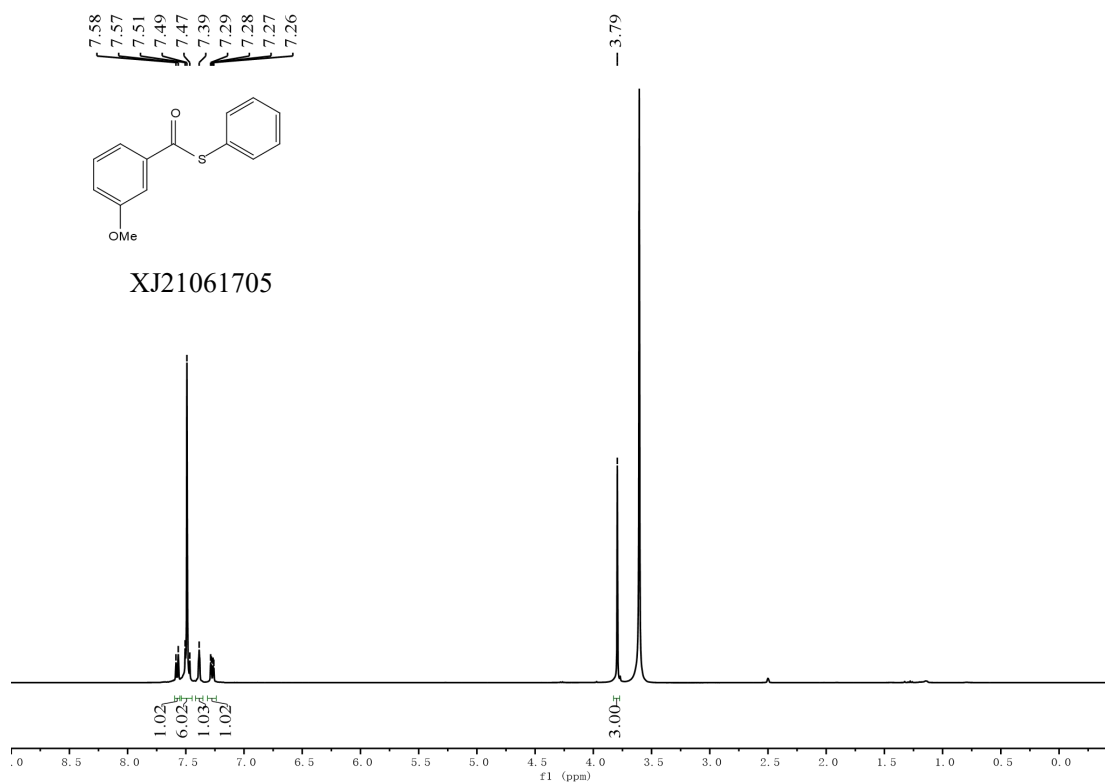

$^{13}\text{C}$  NMR (101 MHz,  $\text{DMSO}-d_6$ ) of compound **3qa**

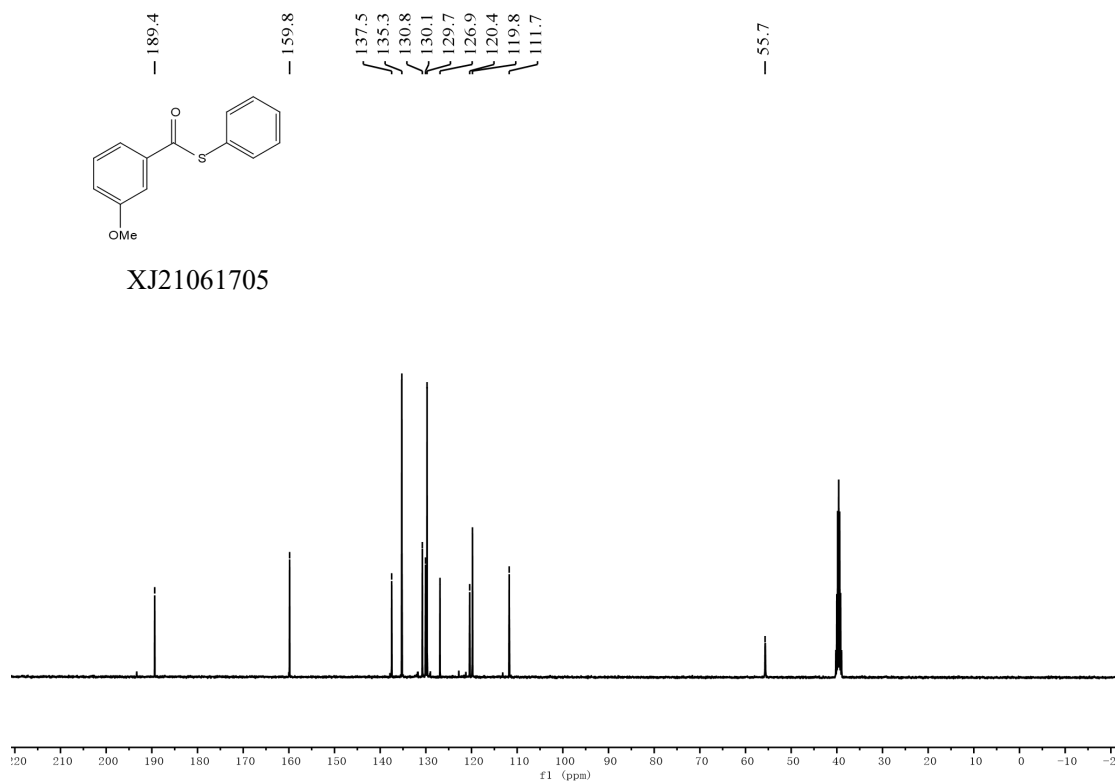

$^1\text{H}$  NMR (400 MHz,  $\text{DMSO-}d_6$ ) of compound **3ra**

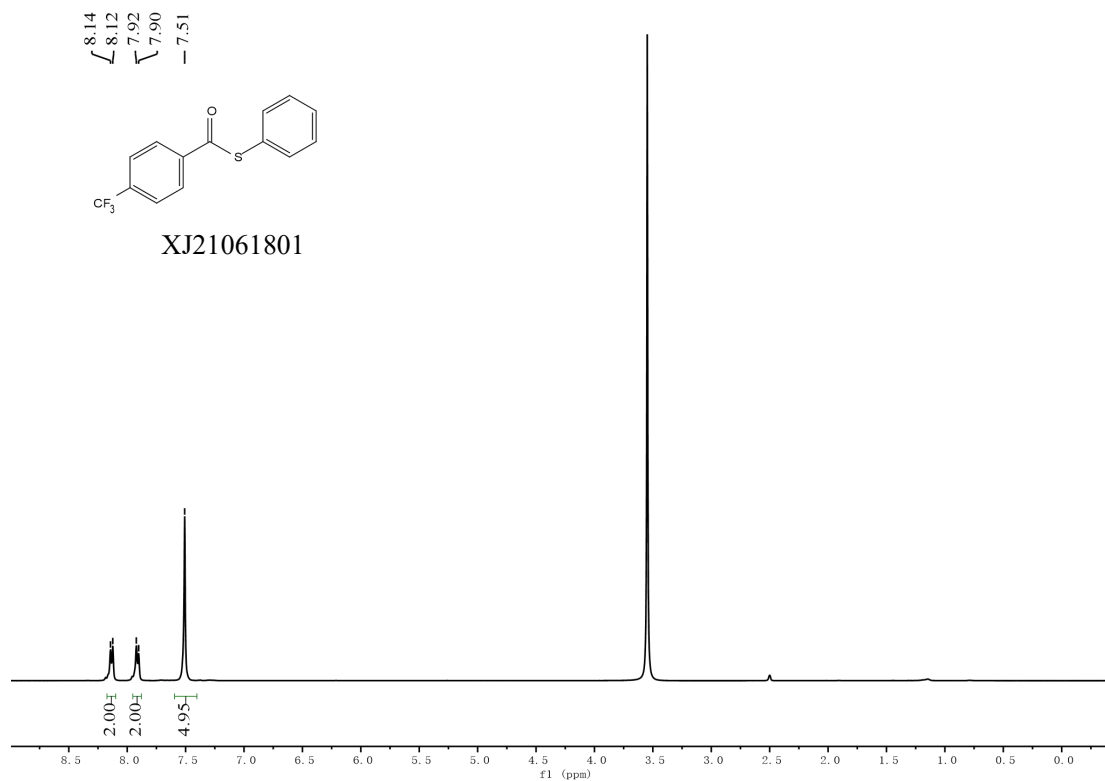

$^{13}\text{C}$  NMR (101 MHz,  $\text{DMSO-}d_6$ ) of compound **3ra**

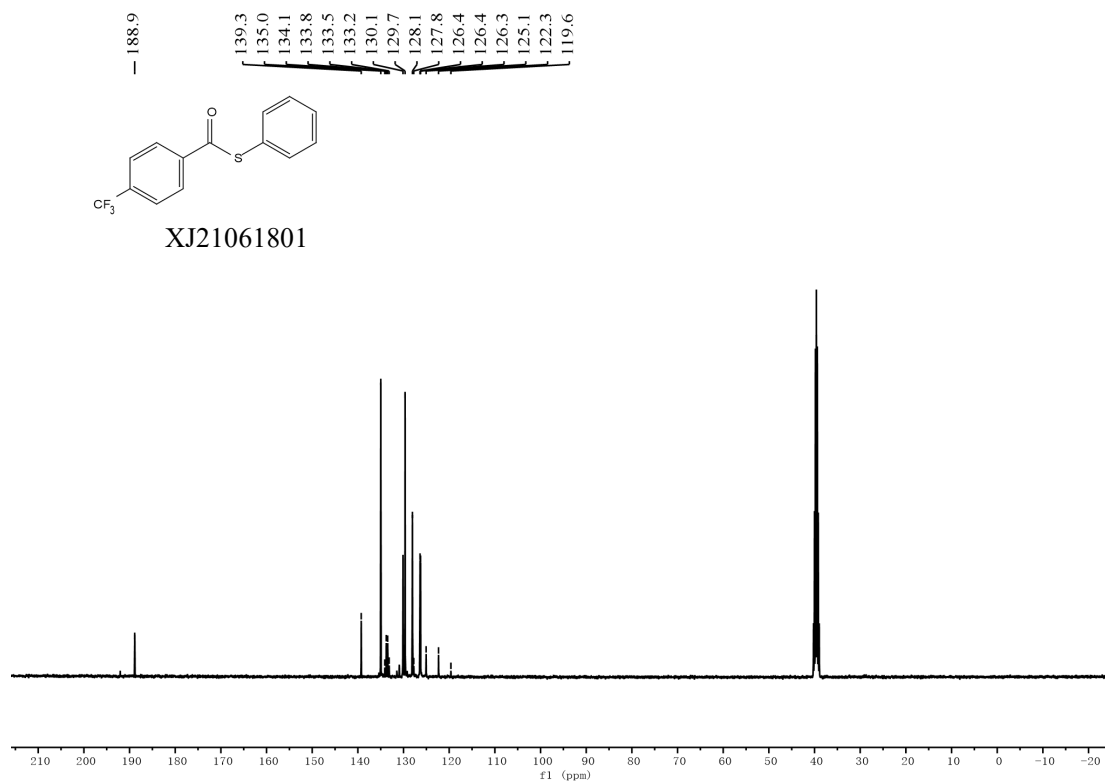

$^{19}\text{F}$  NMR (376 MHz,  $\text{DMSO-}d_6$ ) of compound **3ra**

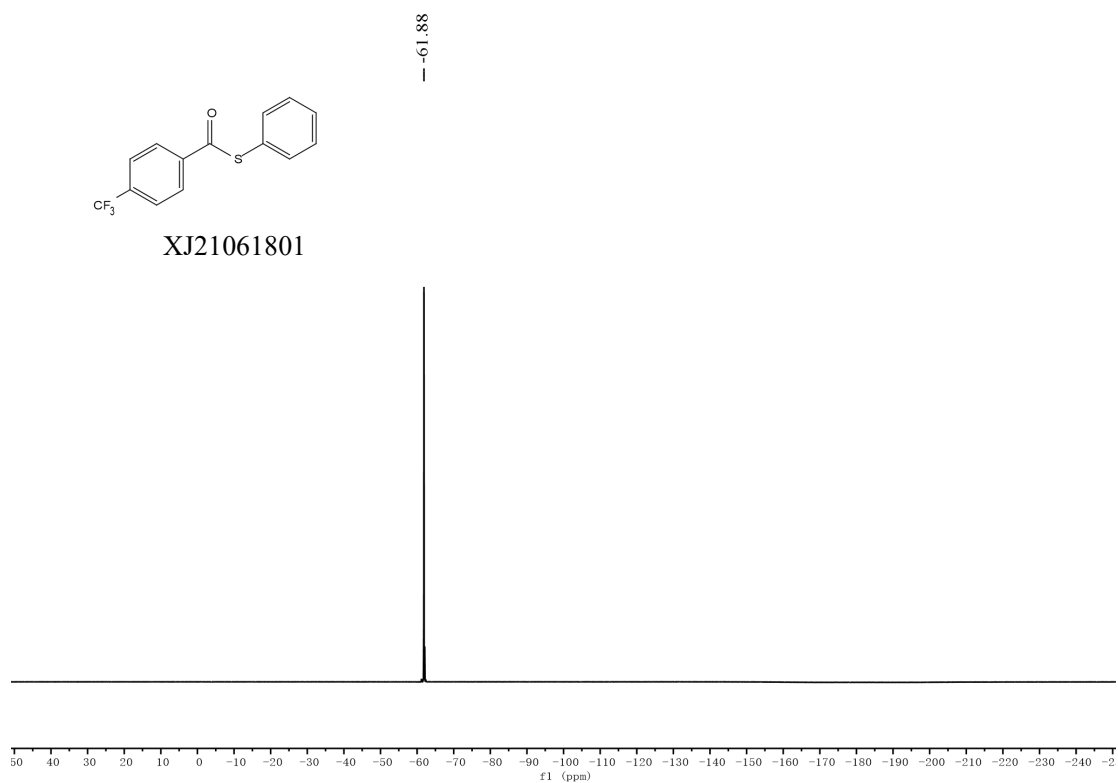

$^1\text{H}$  NMR (400 MHz,  $\text{DMSO-}d_6$ ) of compound **3sa**

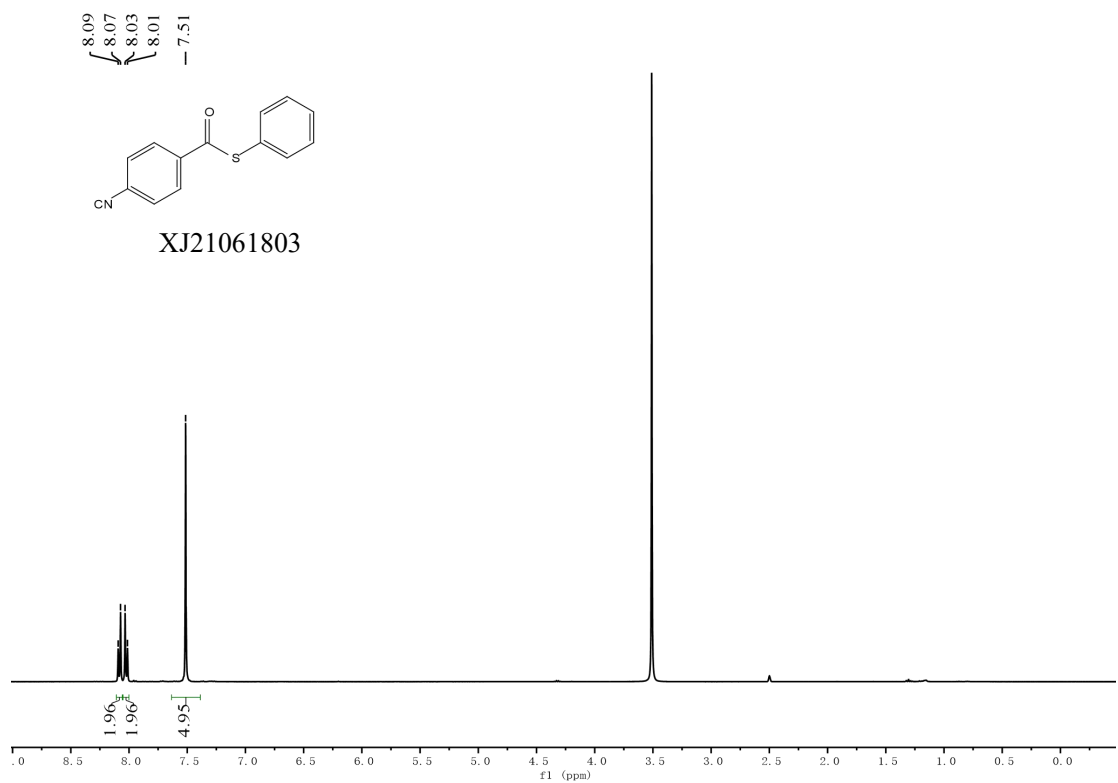

$^{13}\text{C}$  NMR (101 MHz,  $\text{DMSO-}d_6$ ) of compound **3sa**

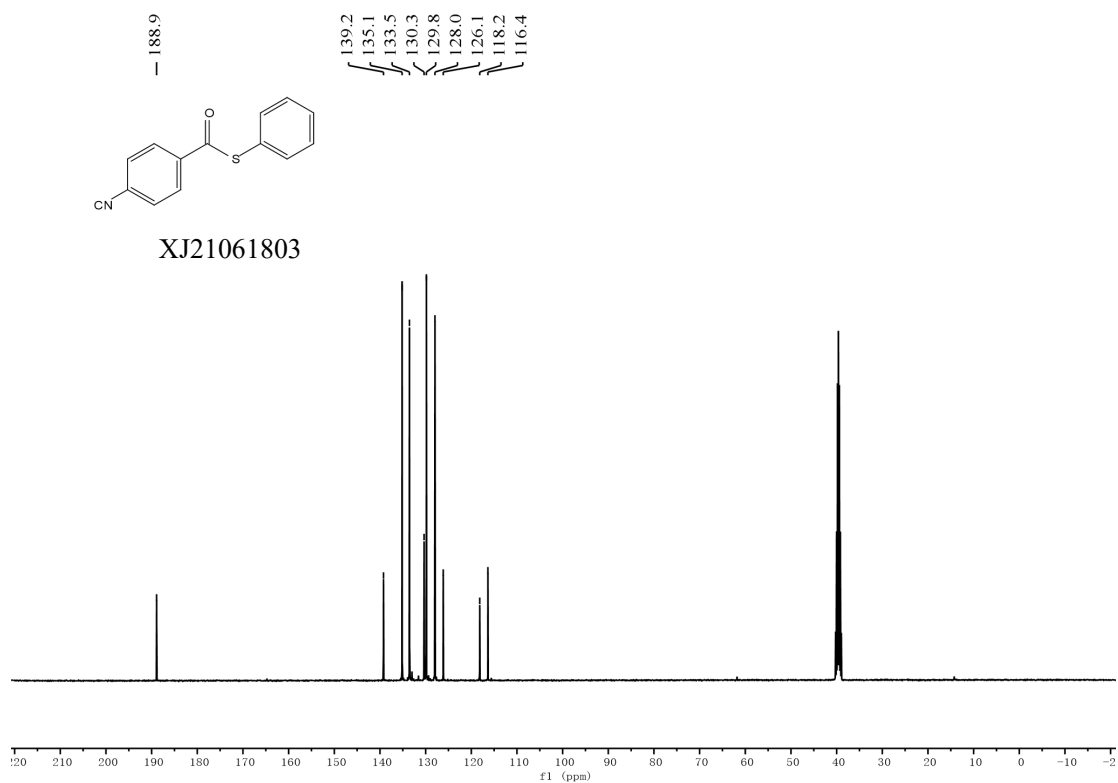

$^1\text{H}$  NMR (400 MHz,  $\text{DMSO-}d_6$ ) of compound **3ta**

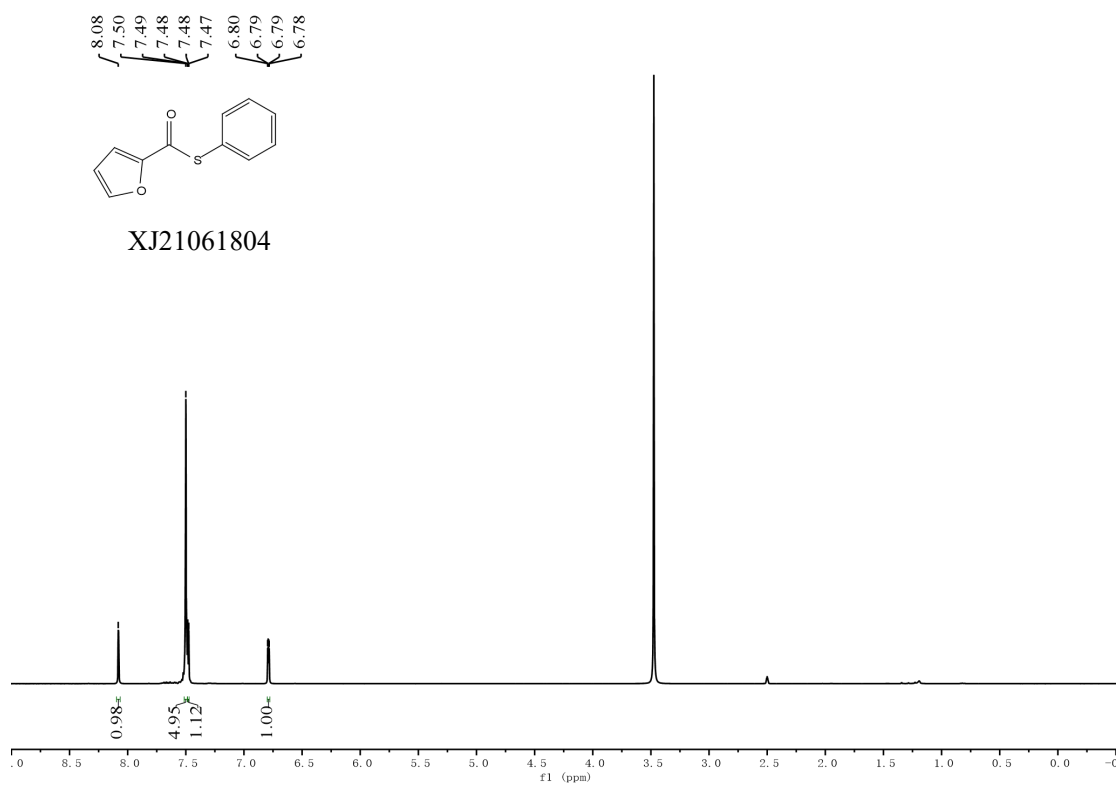

<sup>13</sup>C NMR (101 MHz, DMSO-*d*<sub>6</sub>) of compound **3ta**

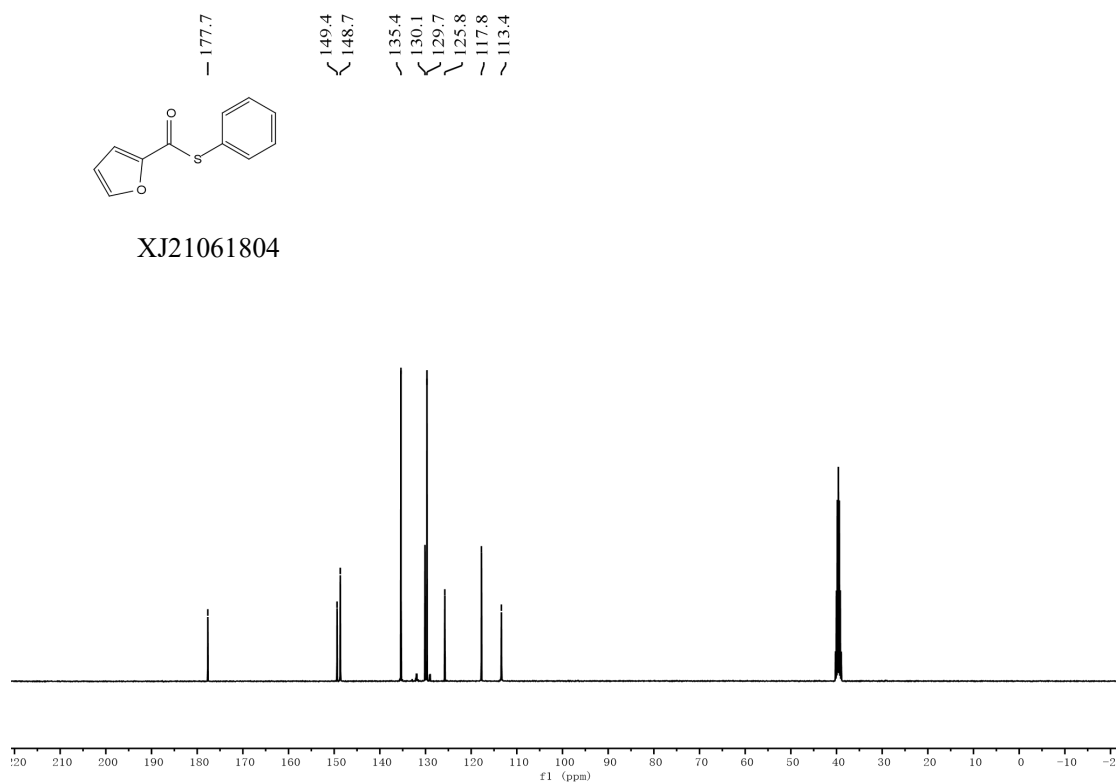

<sup>1</sup>H NMR (400 MHz, DMSO-*d*<sub>6</sub>) of compound **3ua**

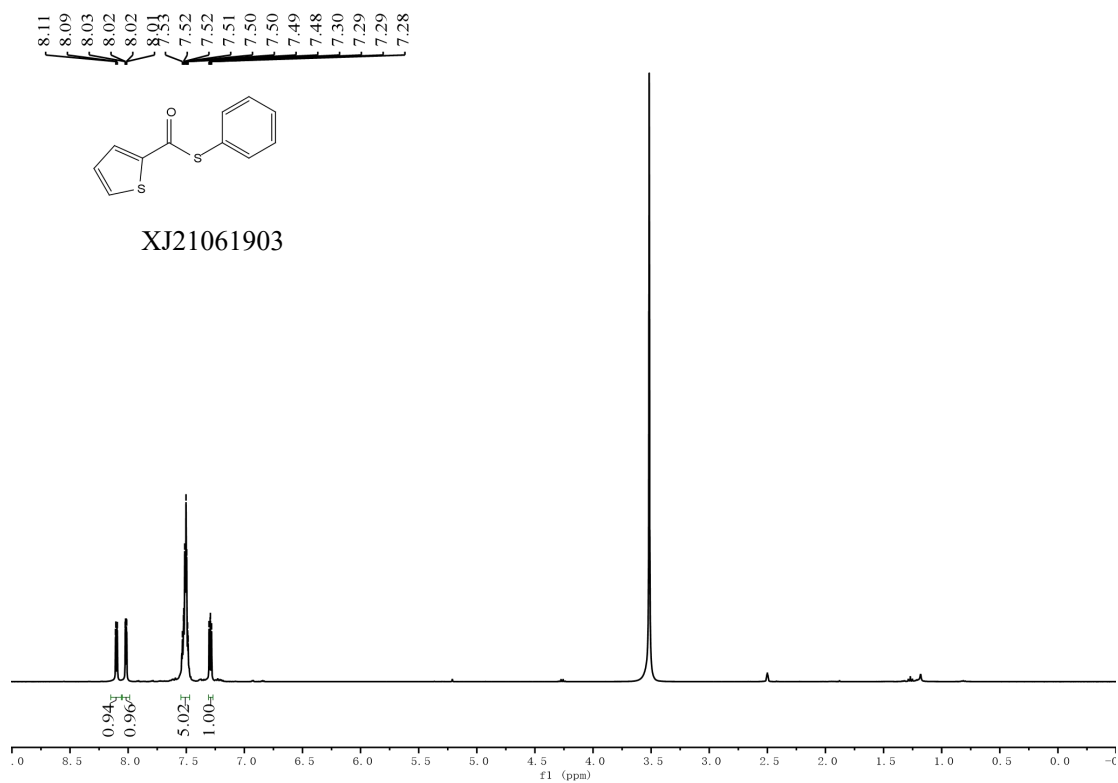

$^{13}\text{C}$  NMR (101 MHz,  $\text{DMSO-}d_6$ ) of compound **3ua**

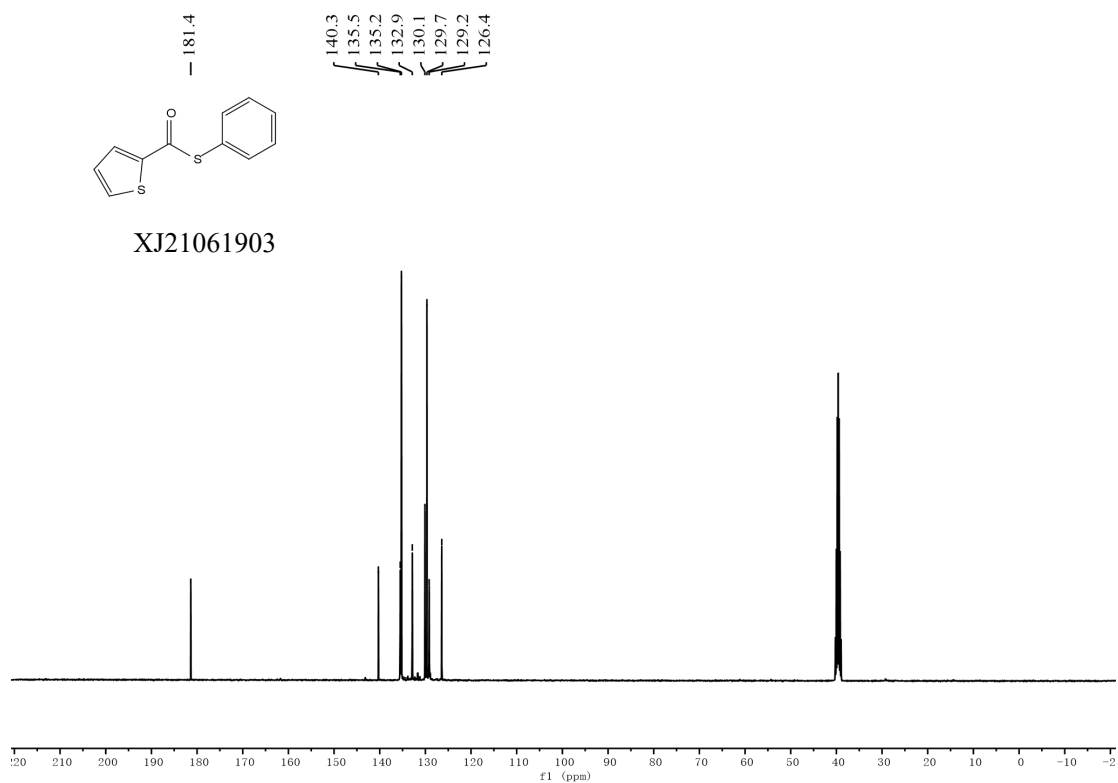

$^1\text{H}$  NMR (400 MHz,  $\text{DMSO-}d_6$ ) of compound **3va**

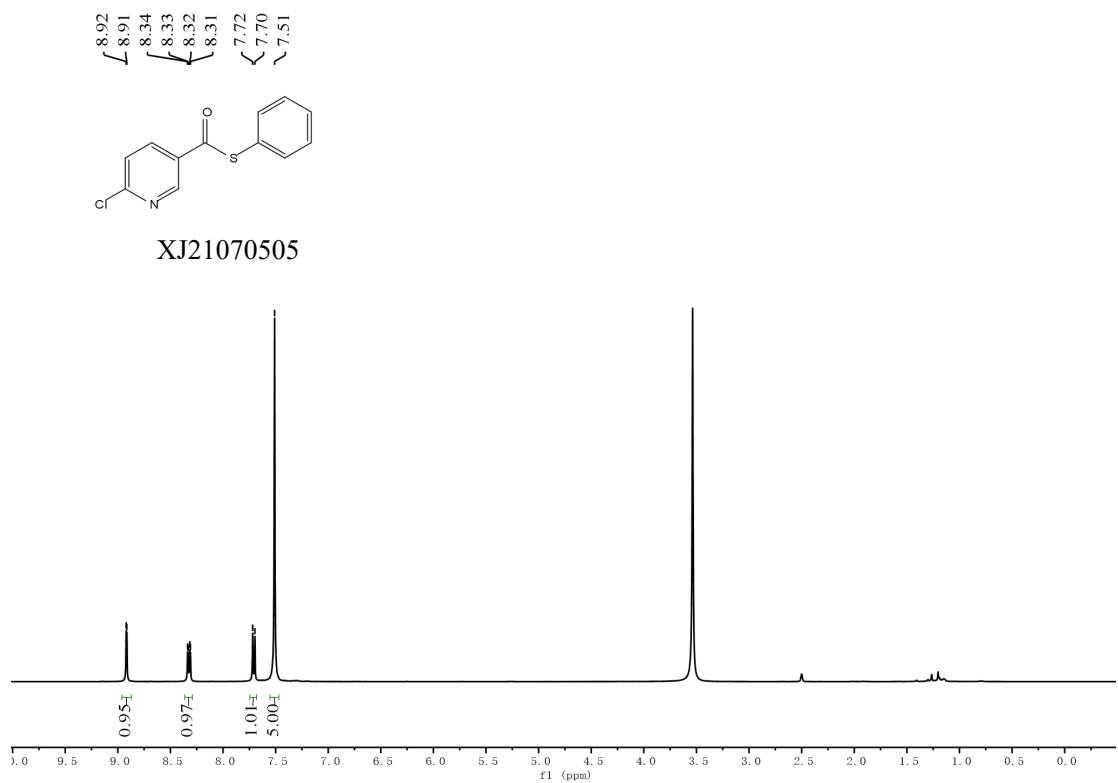

$^{13}\text{C}$  NMR (101 MHz,  $\text{DMSO-}d_6$ ) of compound **3va**

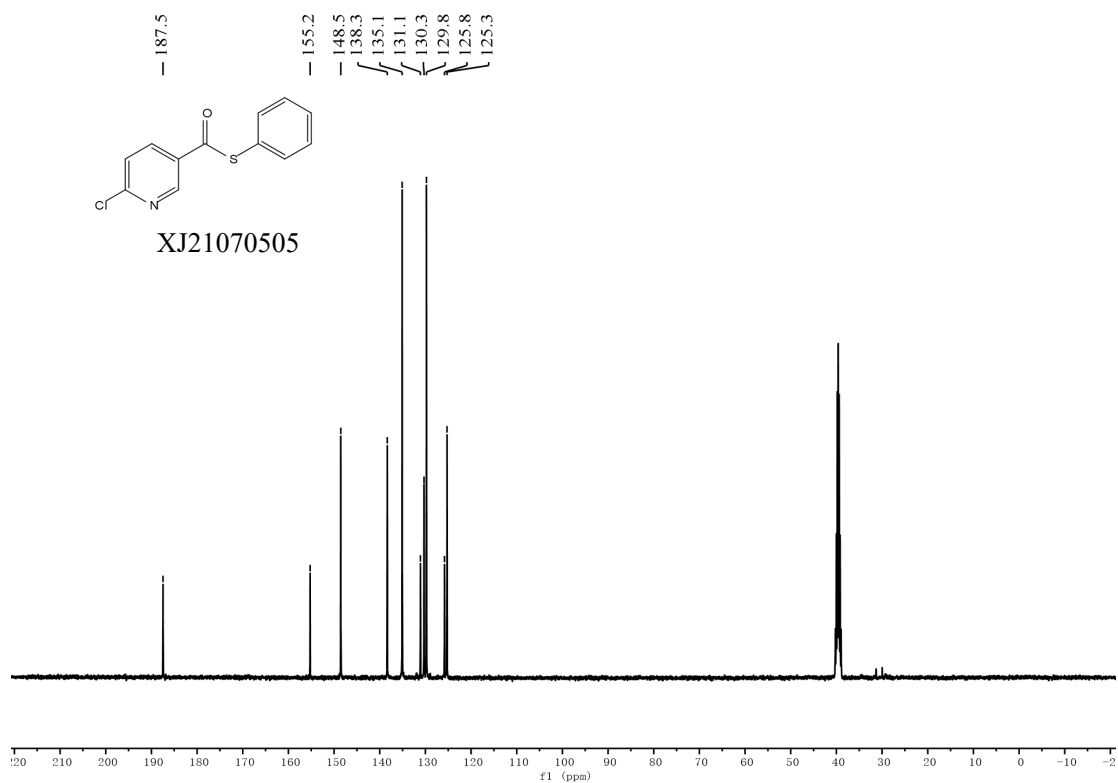

$^1\text{H}$  NMR (400 MHz,  $\text{DMSO-}d_6$ ) of compound **3wa**

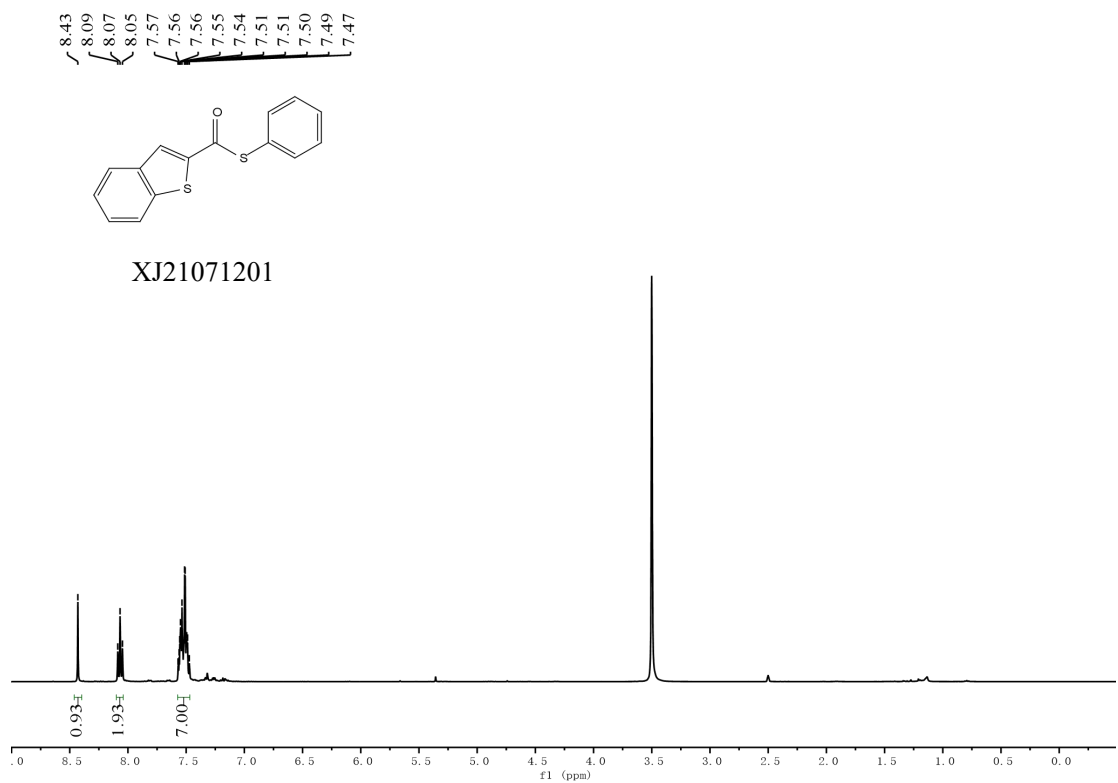



<sup>13</sup>C NMR (101 MHz, DMSO-*d*<sub>6</sub>) of compound **3wa**

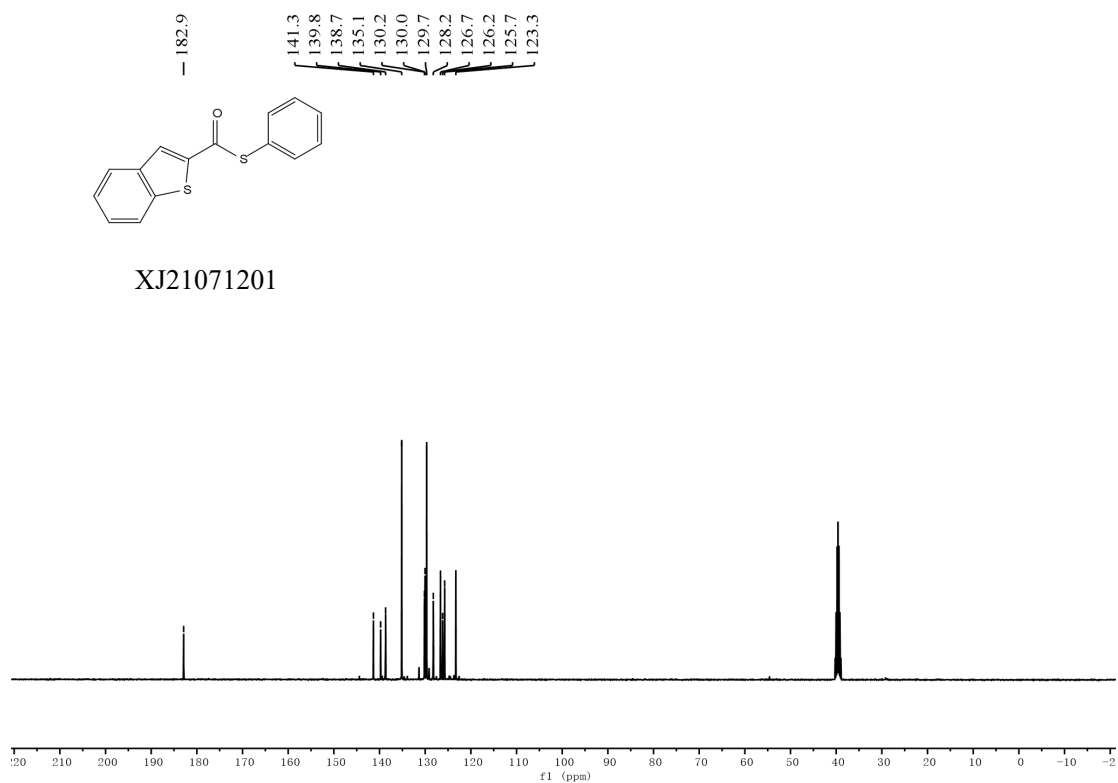

<sup>1</sup>H NMR (400 MHz, DMSO-*d*<sub>6</sub>) of compound **3xa**

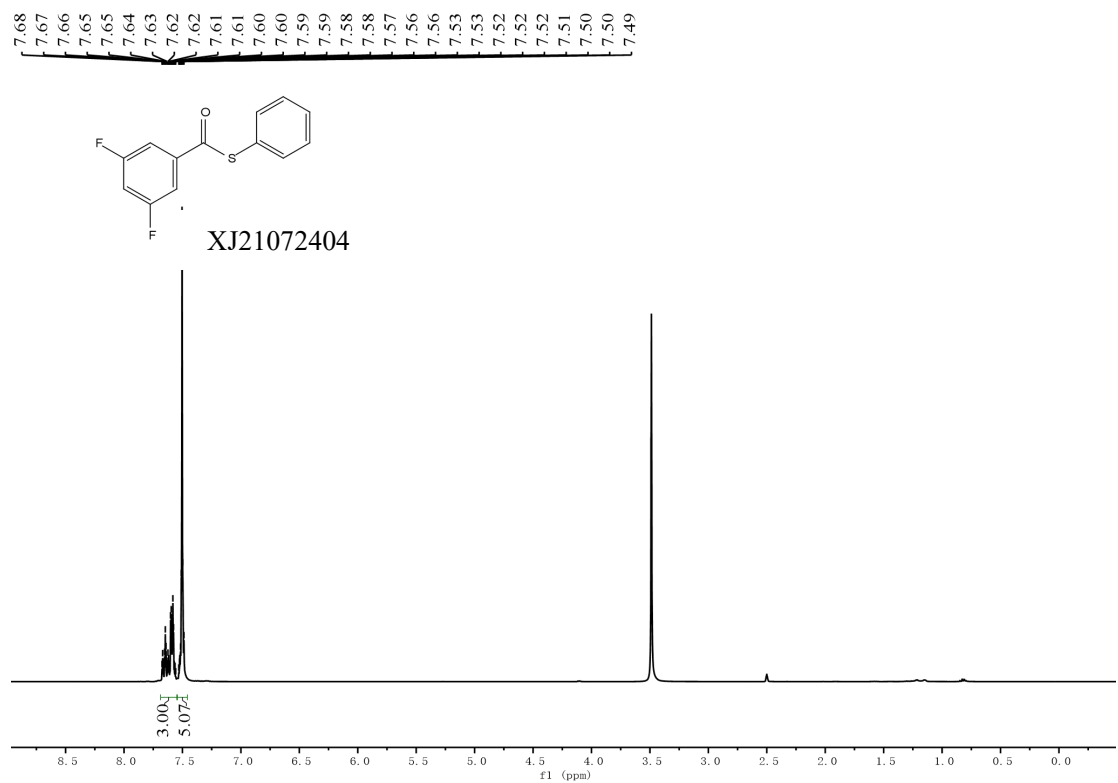

<sup>13</sup>C NMR (101 MHz, DMSO-*d*<sub>6</sub>) of compound **3xa**

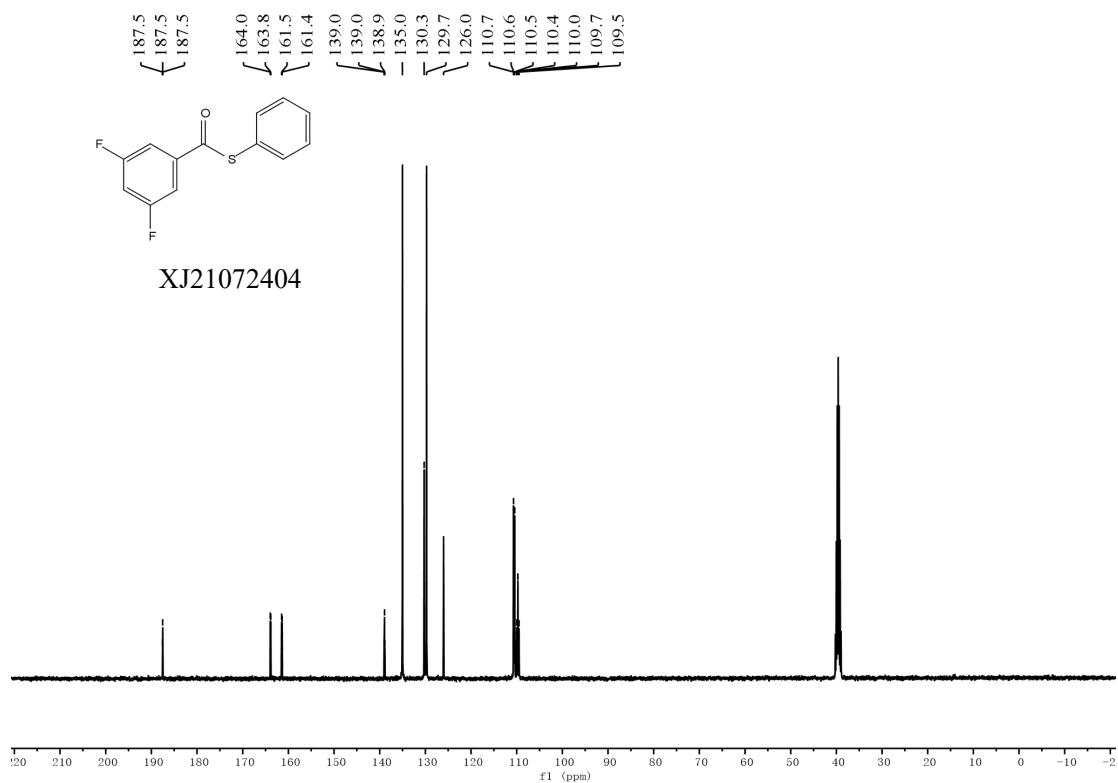

<sup>19</sup>F NMR (376 MHz, DMSO-*d*<sub>6</sub>) of compound **3xa**

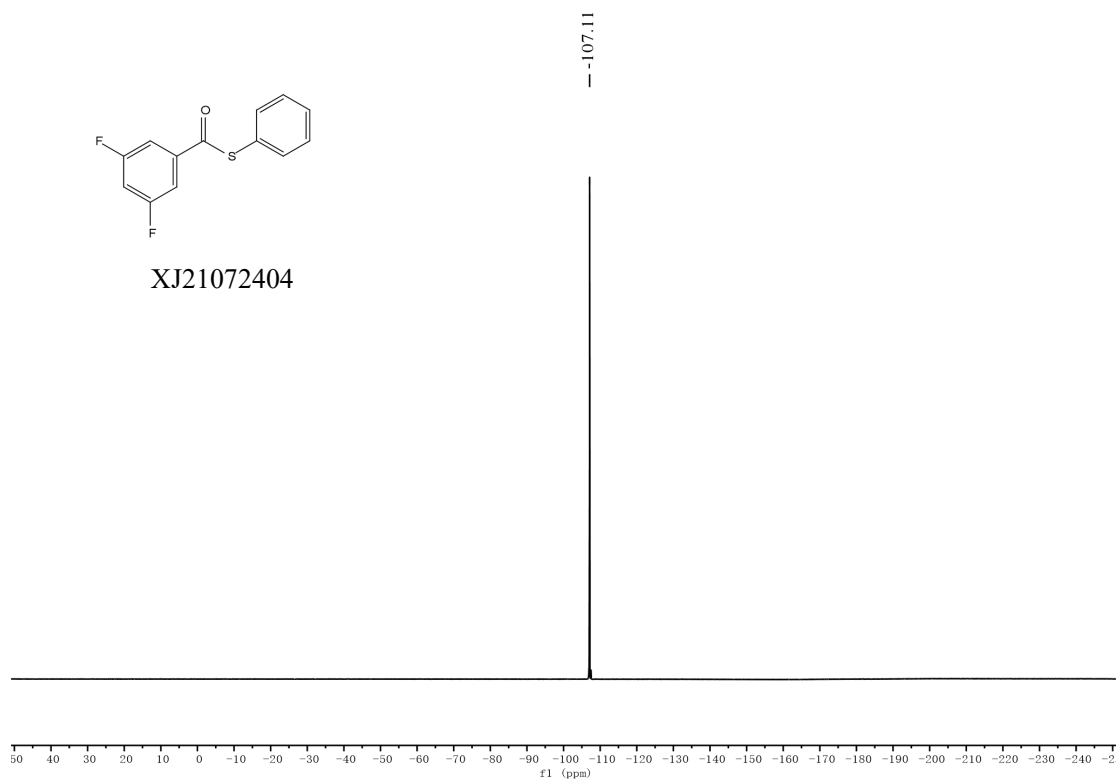

$^1\text{H}$  NMR (400 MHz,  $\text{DMSO-}d_6$ ) of compound **3ya**

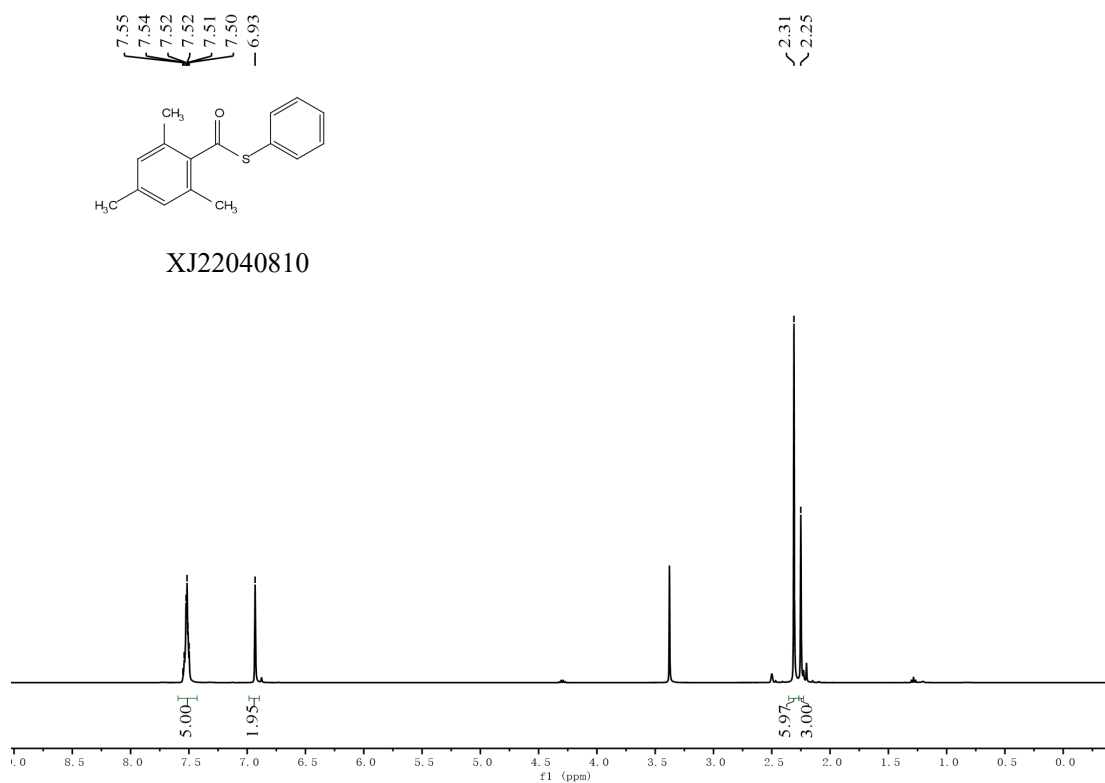

$^{13}\text{C}$  NMR (101 MHz,  $\text{DMSO-}d_6$ ) of compound **3ya**

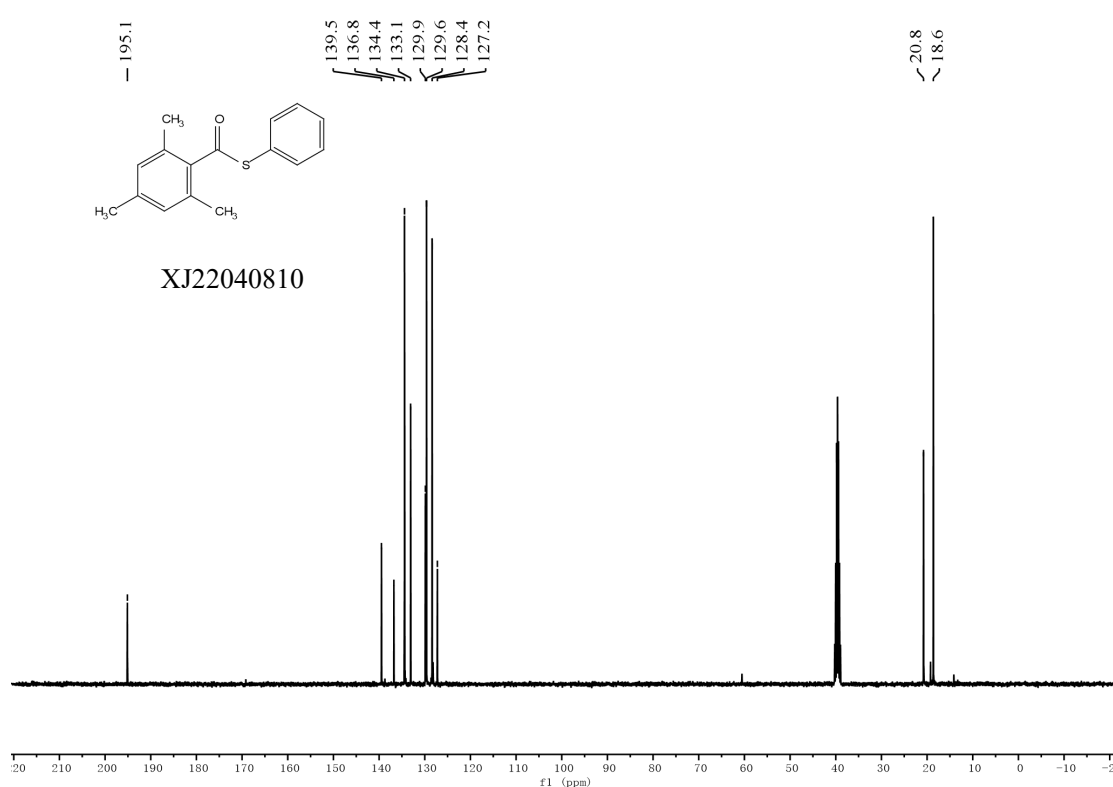

$^1\text{H}$  NMR (400 MHz,  $\text{DMSO-}d_6$ ) of compound **3za**

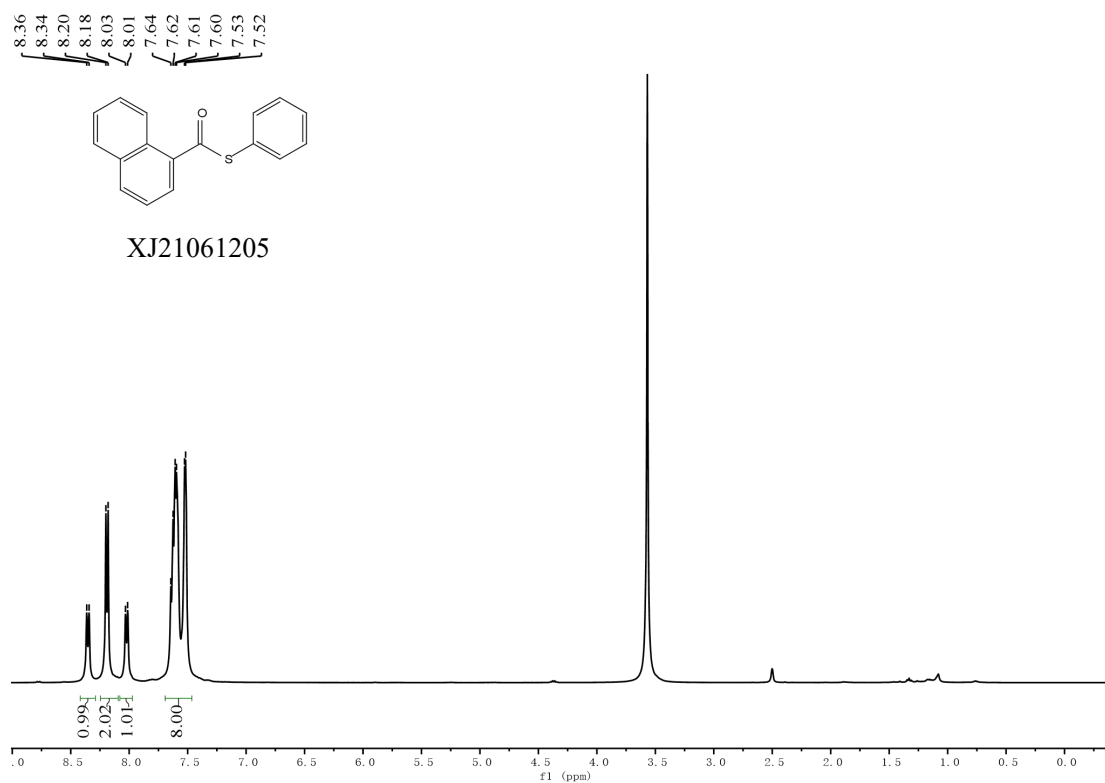

$^{13}\text{C}$  NMR (101 MHz,  $\text{DMSO-}d_6$ ) of compound **3za**

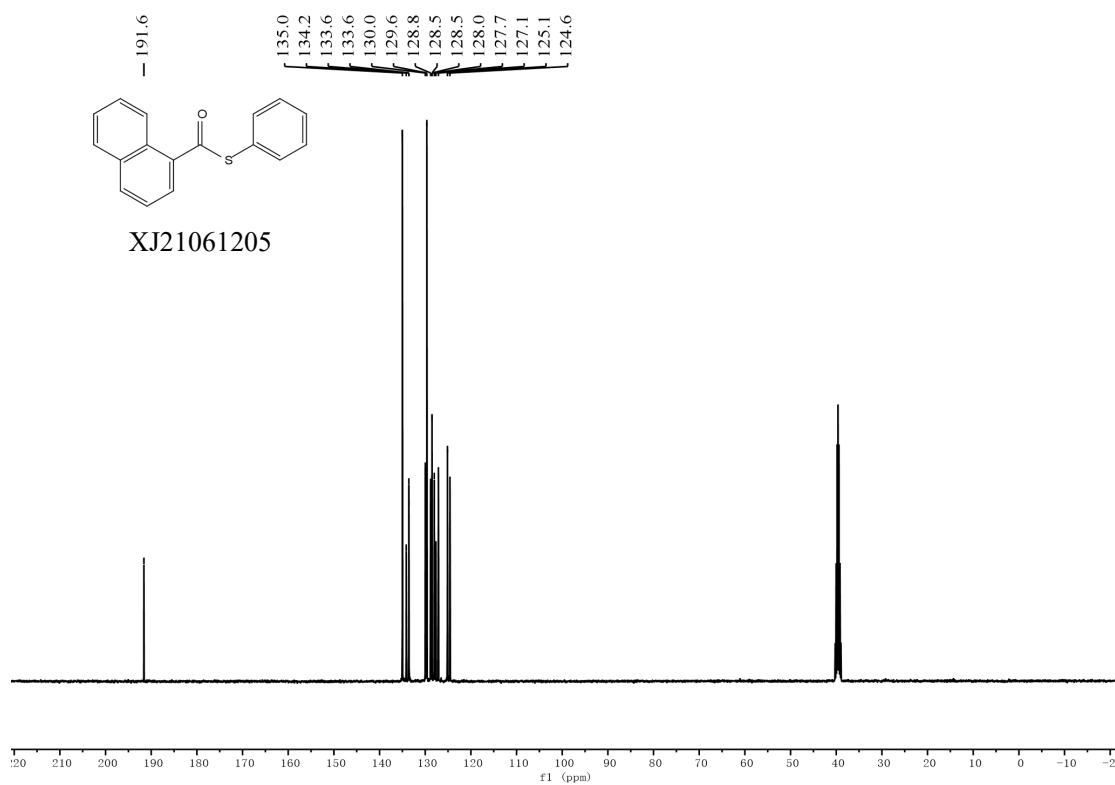

$^1\text{H}$  NMR (400 MHz,  $\text{DMSO-}d_6$ ) of compound **3zaa**

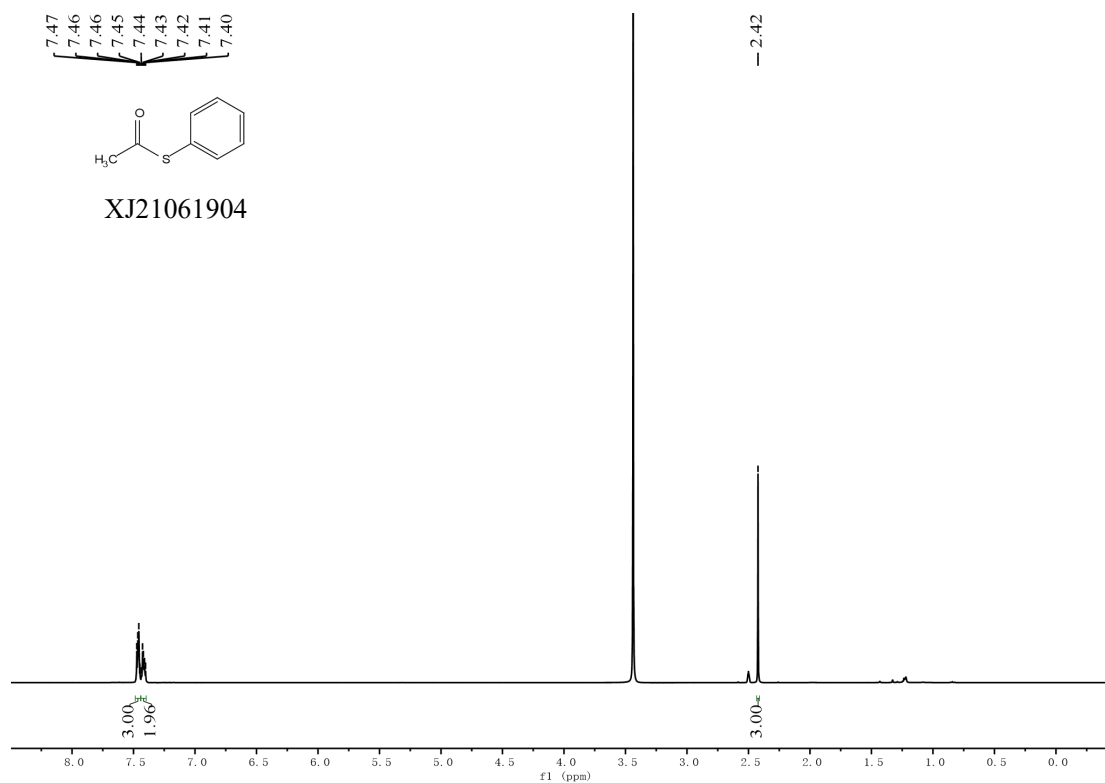

$^{13}\text{C}$  NMR (101 MHz,  $\text{DMSO-}d_6$ ) of compound **3zaa**

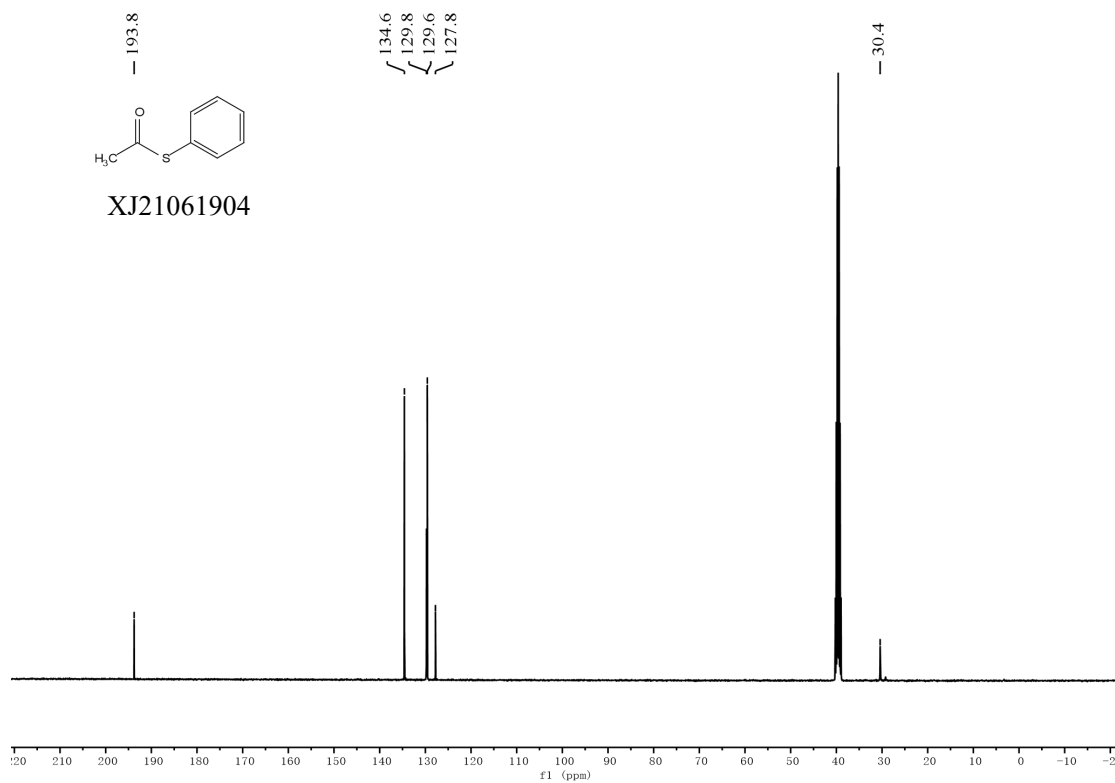

<sup>1</sup>H NMR (400 MHz, DMSO-*d*<sub>6</sub>) of compound **3zab**

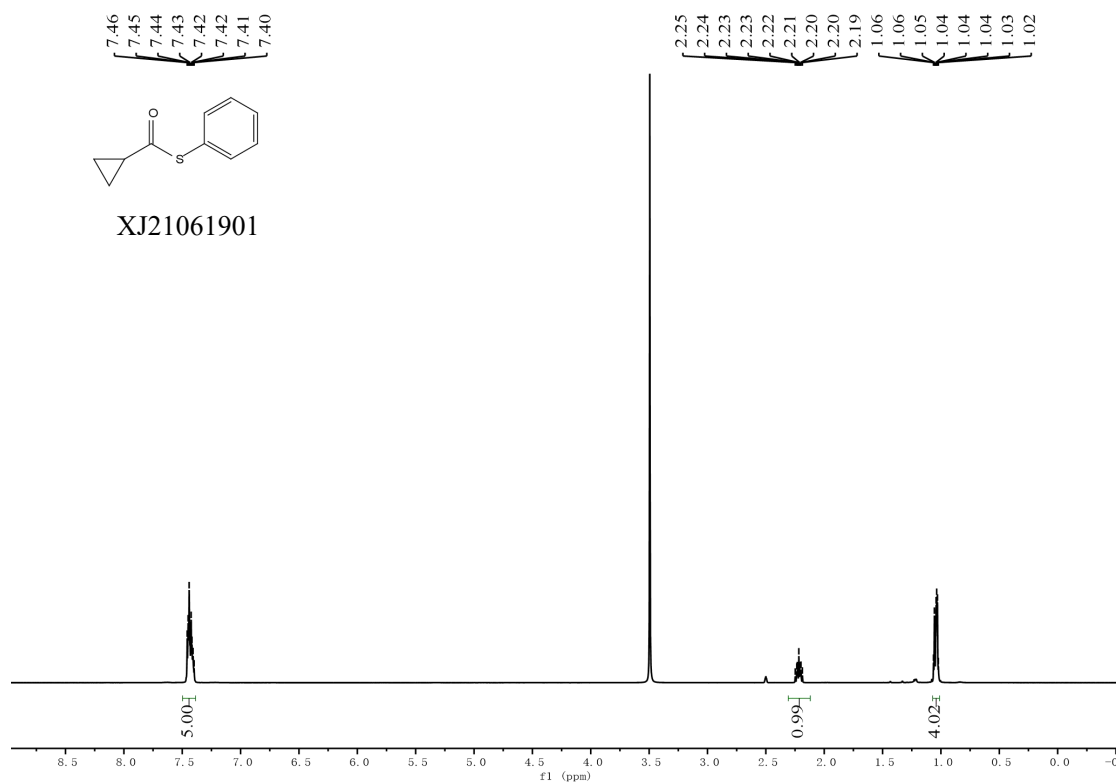

<sup>13</sup>C NMR (101 MHz, DMSO-*d*<sub>6</sub>) of compound **3zab**

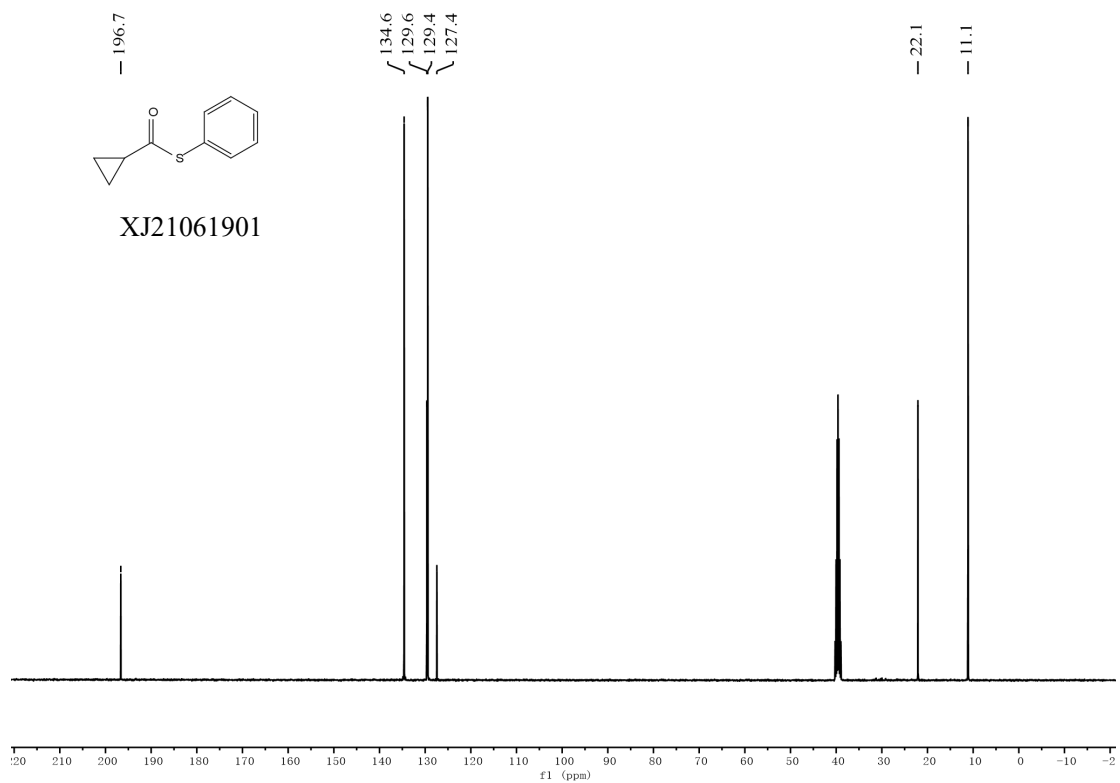

<sup>1</sup>H NMR (400 MHz, DMSO-*d*<sub>6</sub>) of compound **3zac**

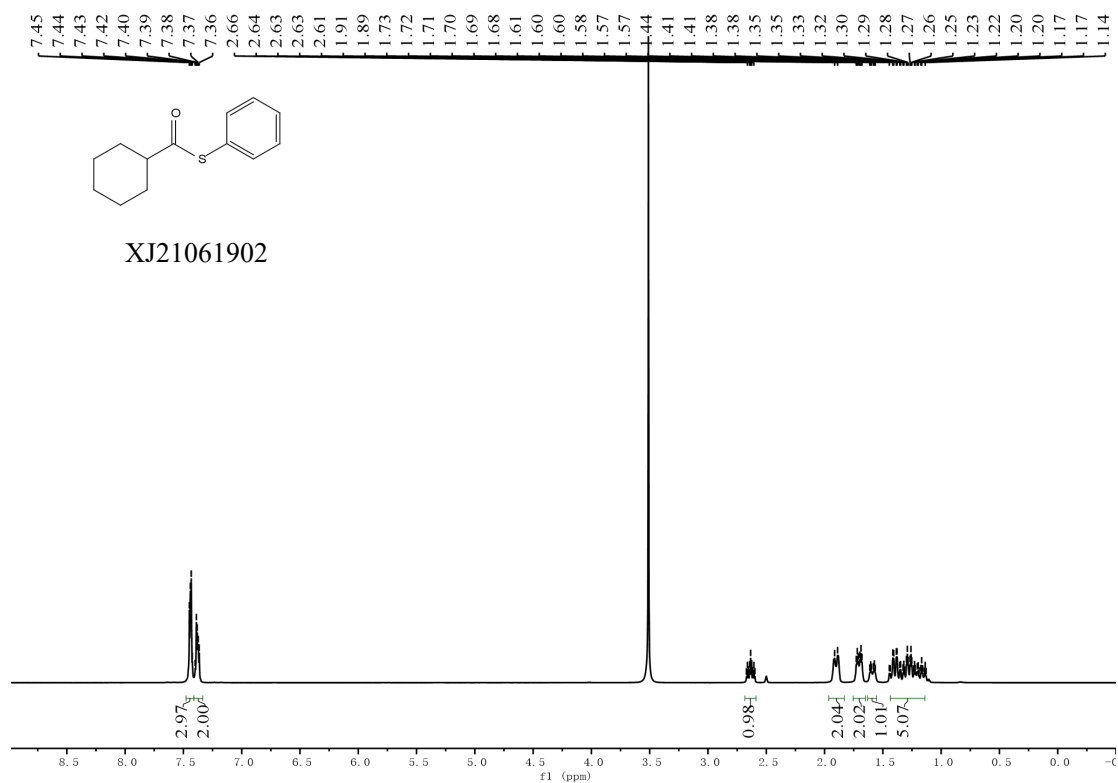

<sup>13</sup>C NMR (101 MHz, DMSO-*d*<sub>6</sub>) of compound **3zac**

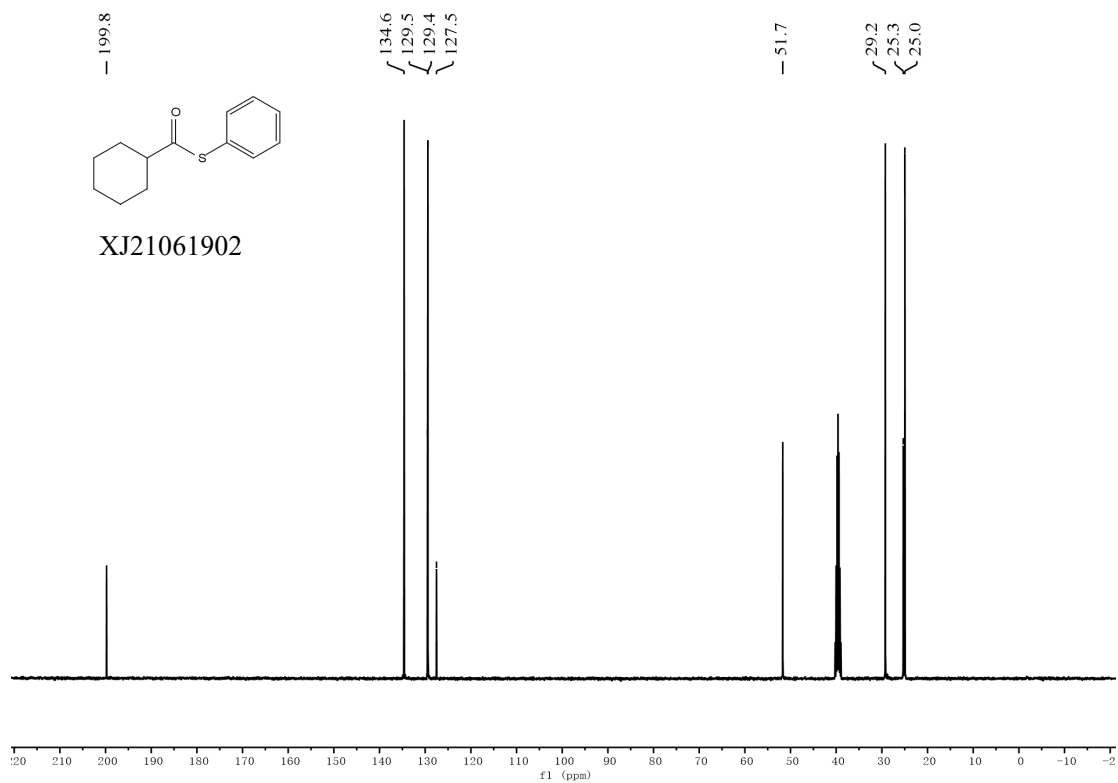

$^1\text{H}$  NMR (400 MHz,  $\text{DMSO-}d_6$ ) of compound **3zad**

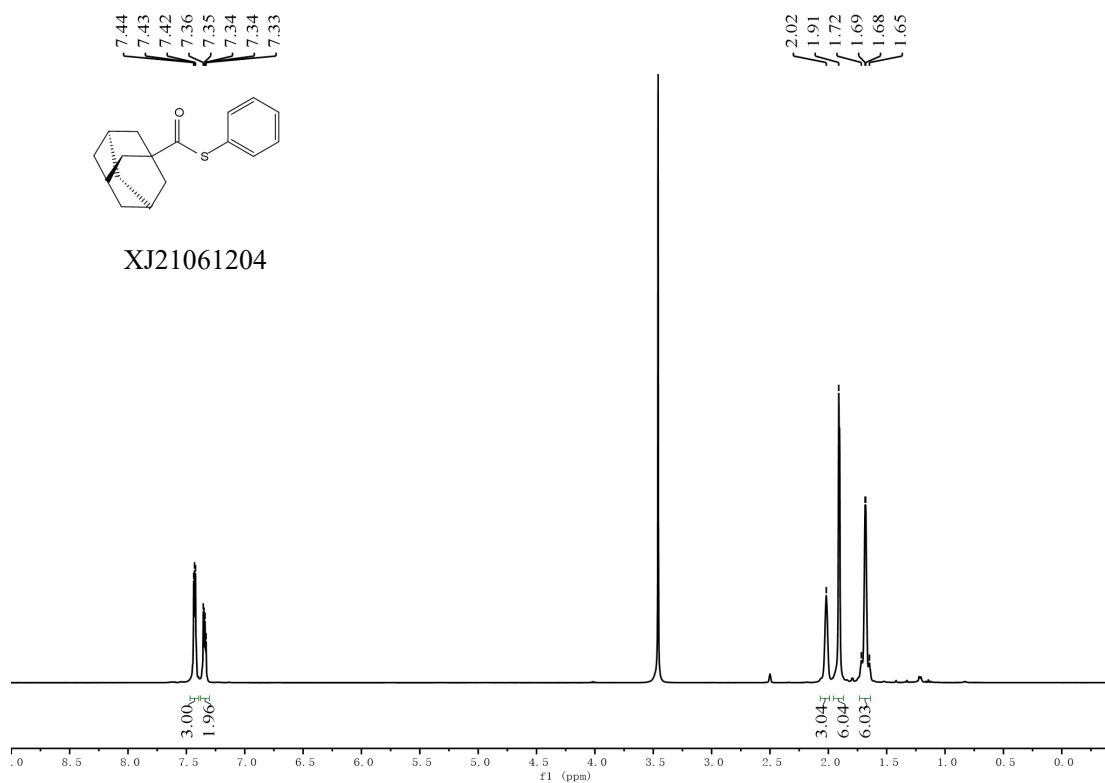

$^{13}\text{C}$  NMR (101 MHz,  $\text{DMSO-}d_6$ ) of compound **3zad**

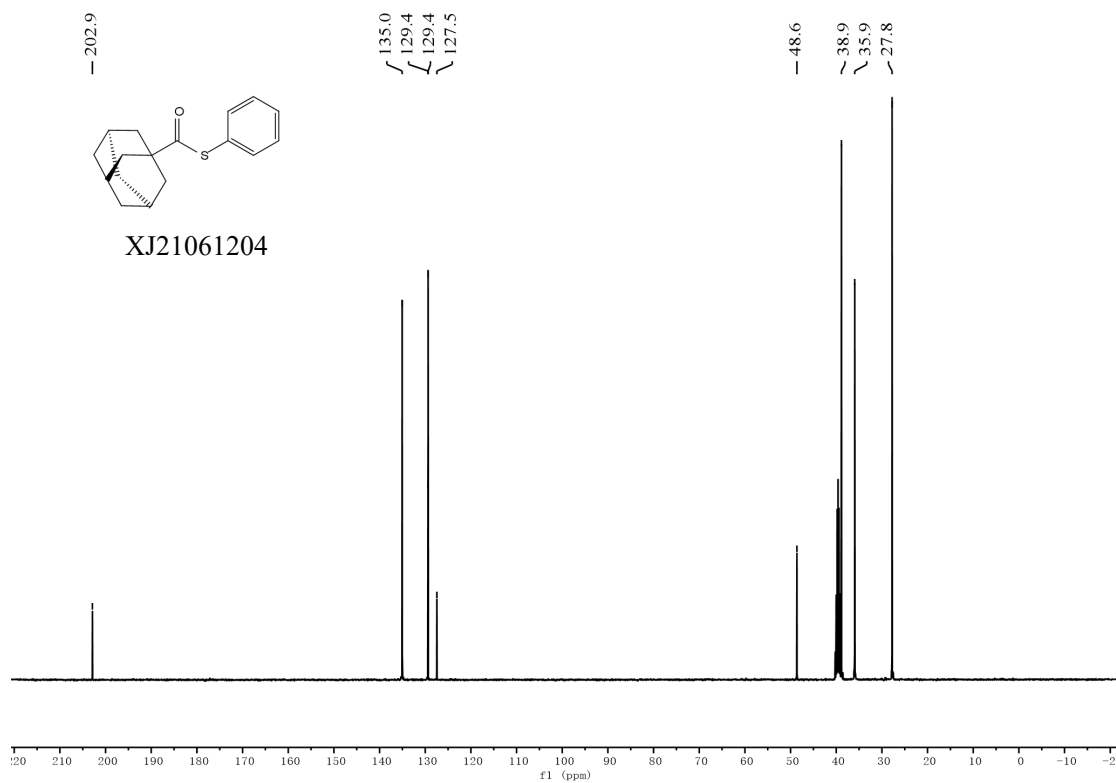



$^1\text{H}$  NMR (400 MHz,  $\text{DMSO-}d_6$ ) of compound **3ab**

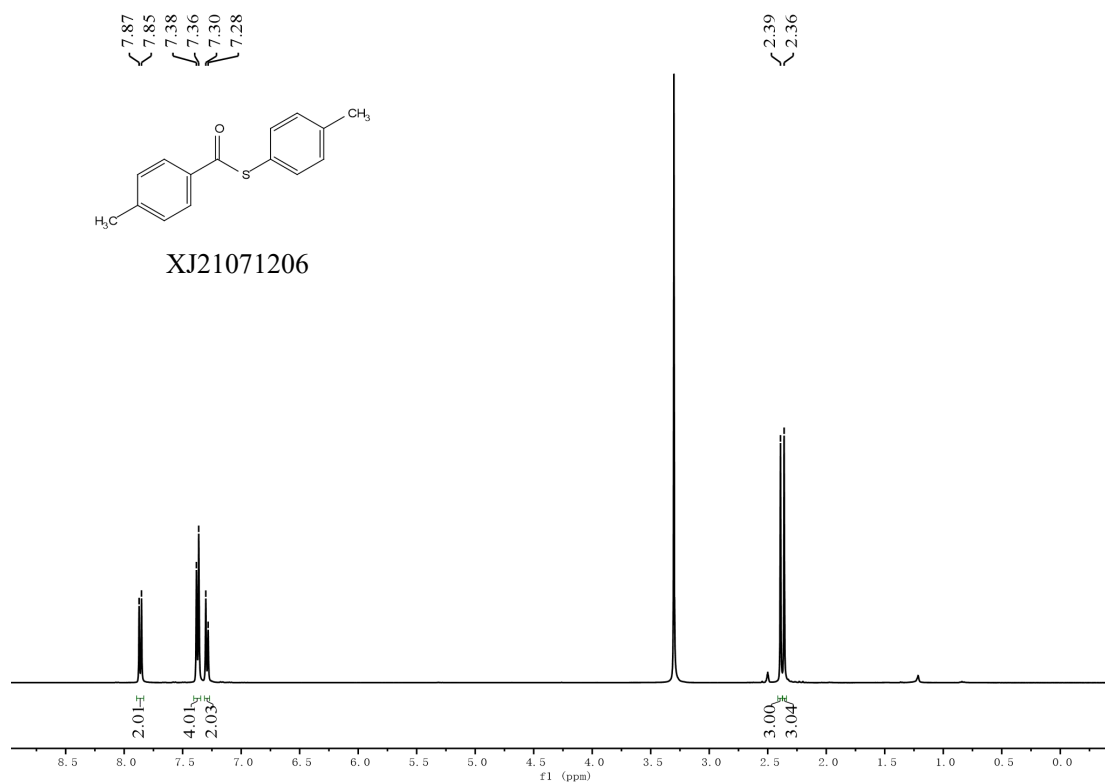

$^{13}\text{C}$  NMR (101 MHz,  $\text{DMSO-}d_6$ ) of compound **3ab**

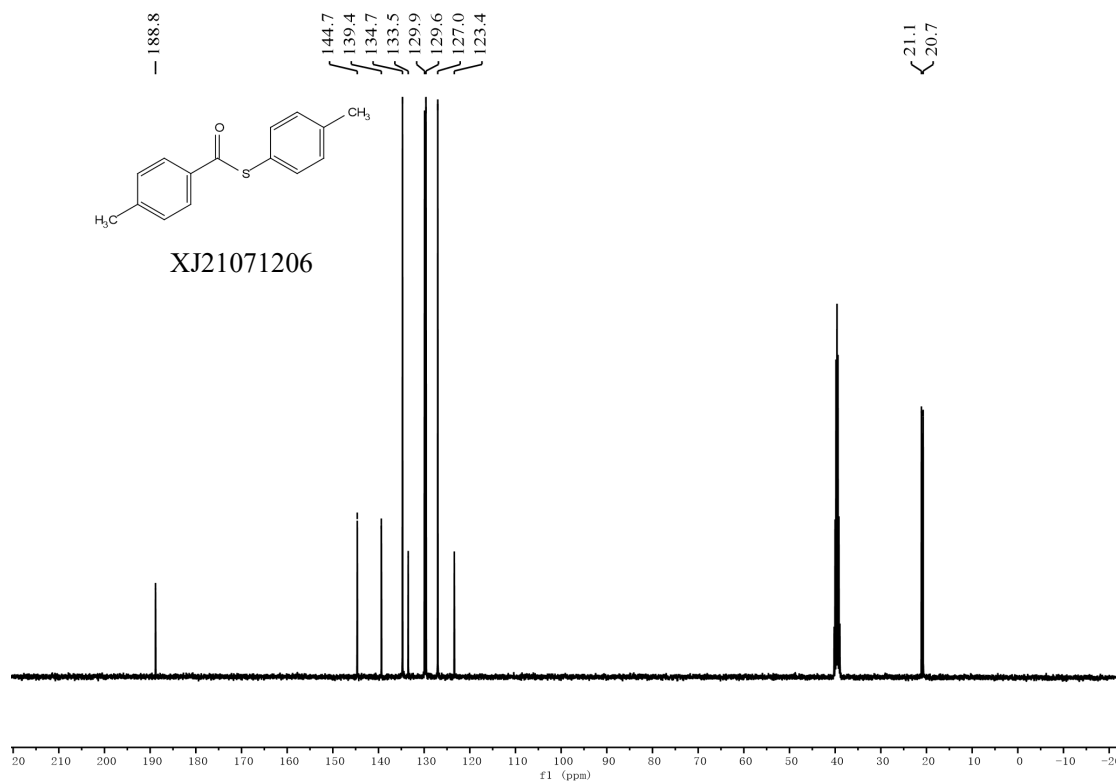

$^1\text{H}$  NMR (400 MHz,  $\text{DMSO-}d_6$ ) of compound **3ac**

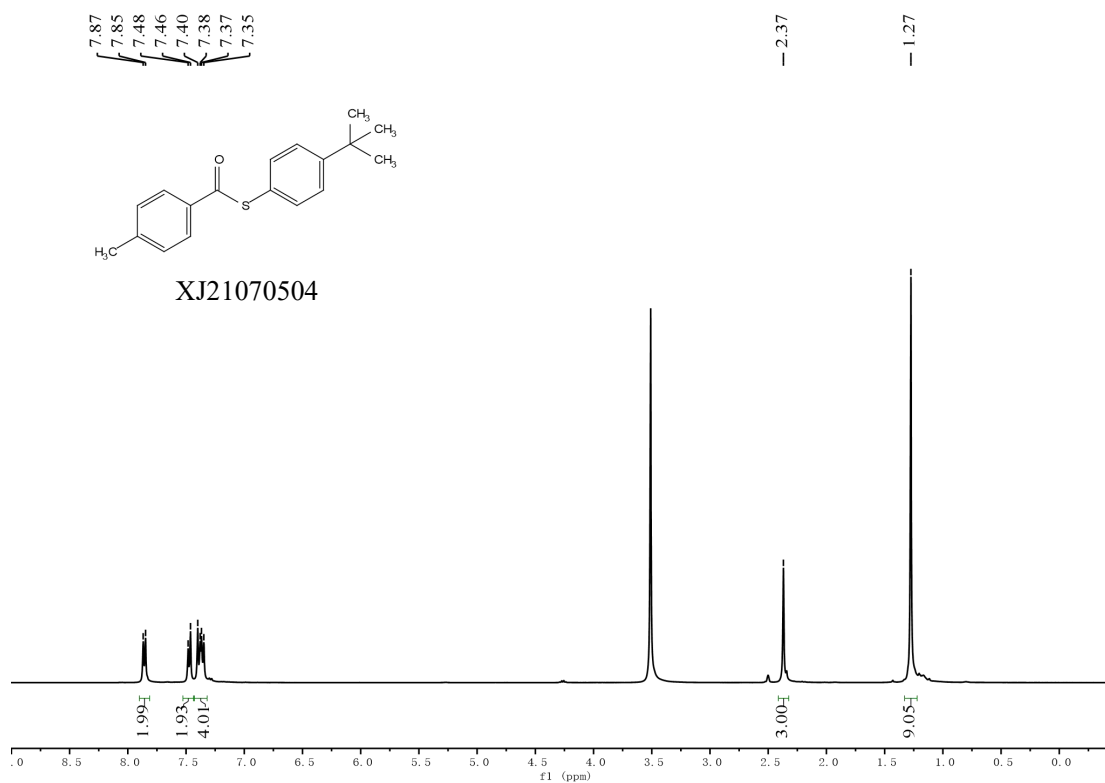

$^{13}\text{C}$  NMR (101 MHz,  $\text{DMSO-}d_6$ ) of compound **3ac**

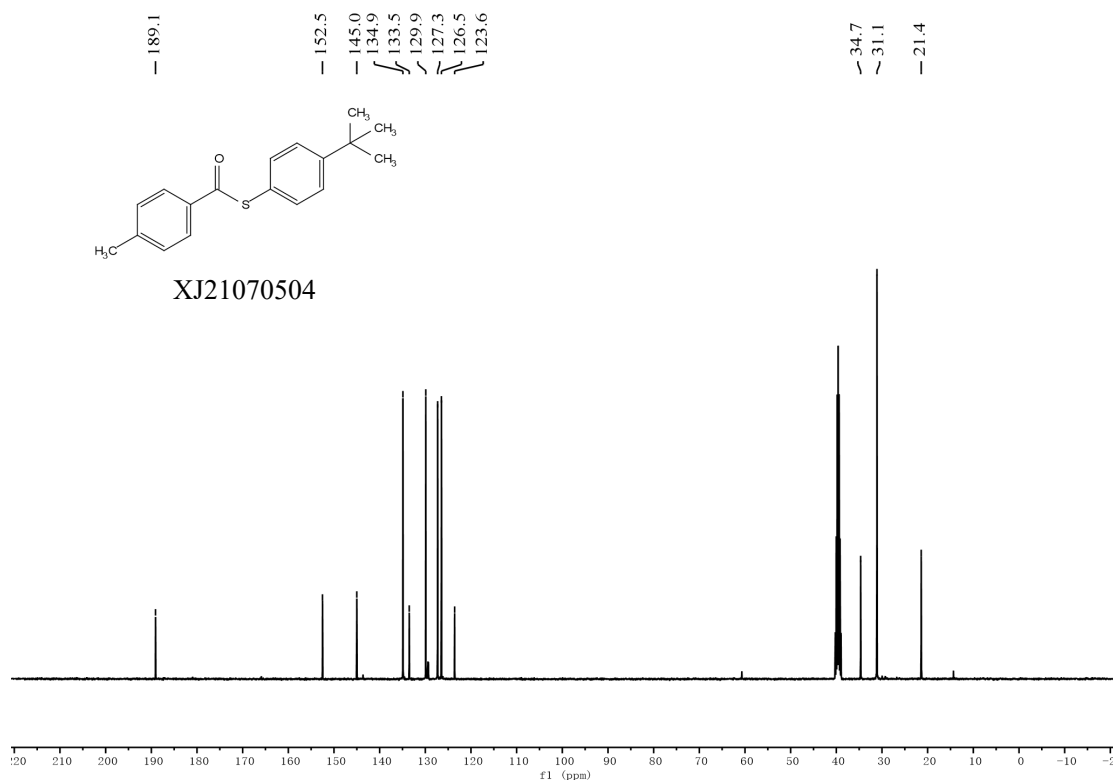

$^1\text{H}$  NMR (400 MHz,  $\text{DMSO-}d_6$ ) of compound **3ad**

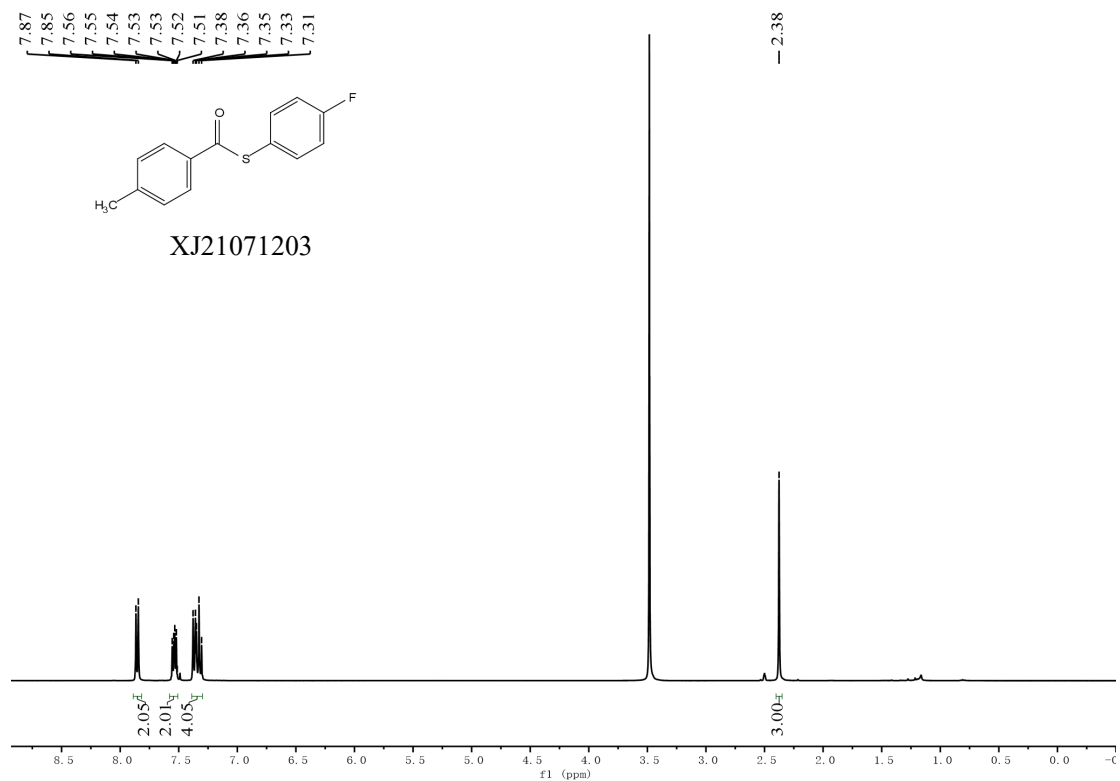

$^{13}\text{C}$  NMR (101 MHz,  $\text{DMSO-}d_6$ ) of compound **3ad**

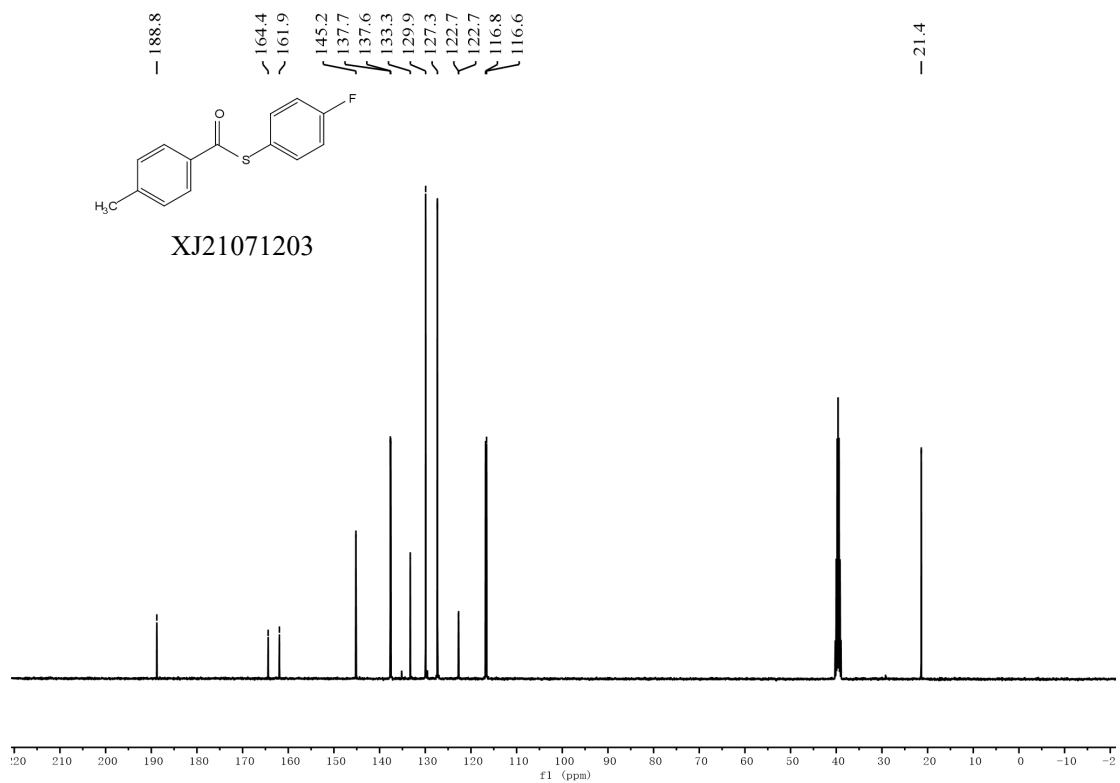

$^{19}\text{F}$  NMR (376 MHz,  $\text{DMSO-}d_6$ ) of compound **3ad**

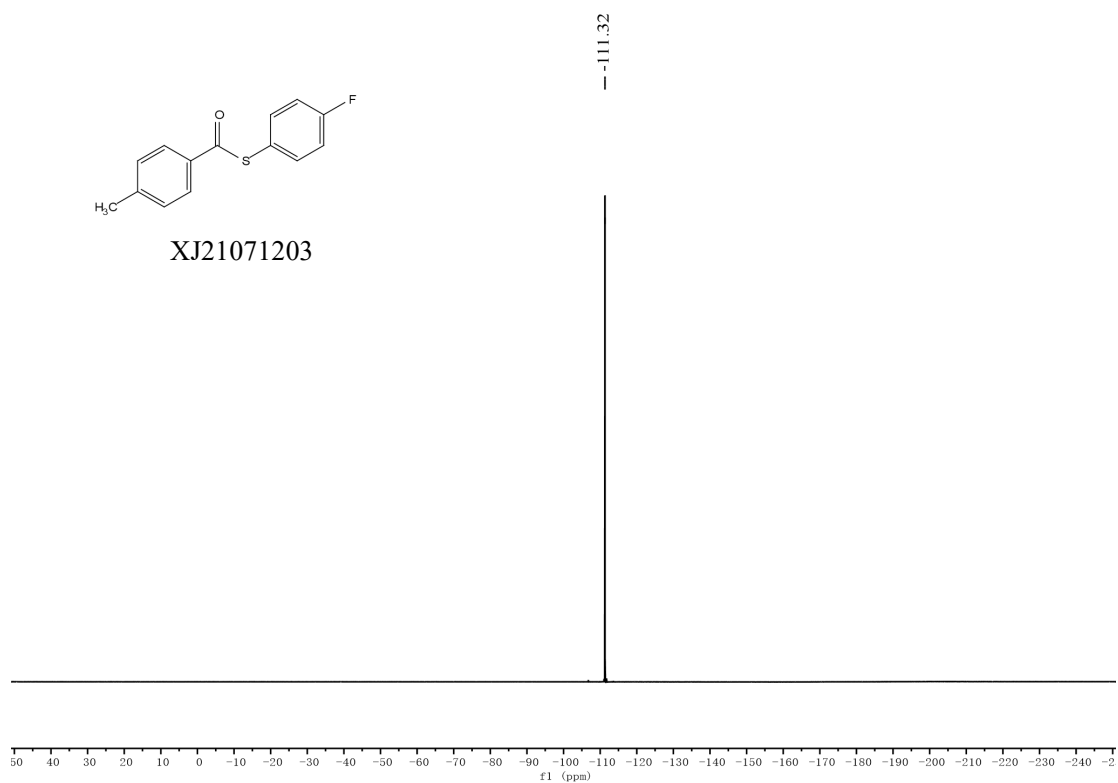

$^1\text{H}$  NMR (400 MHz,  $\text{DMSO-}d_6$ ) of compound **3ae**

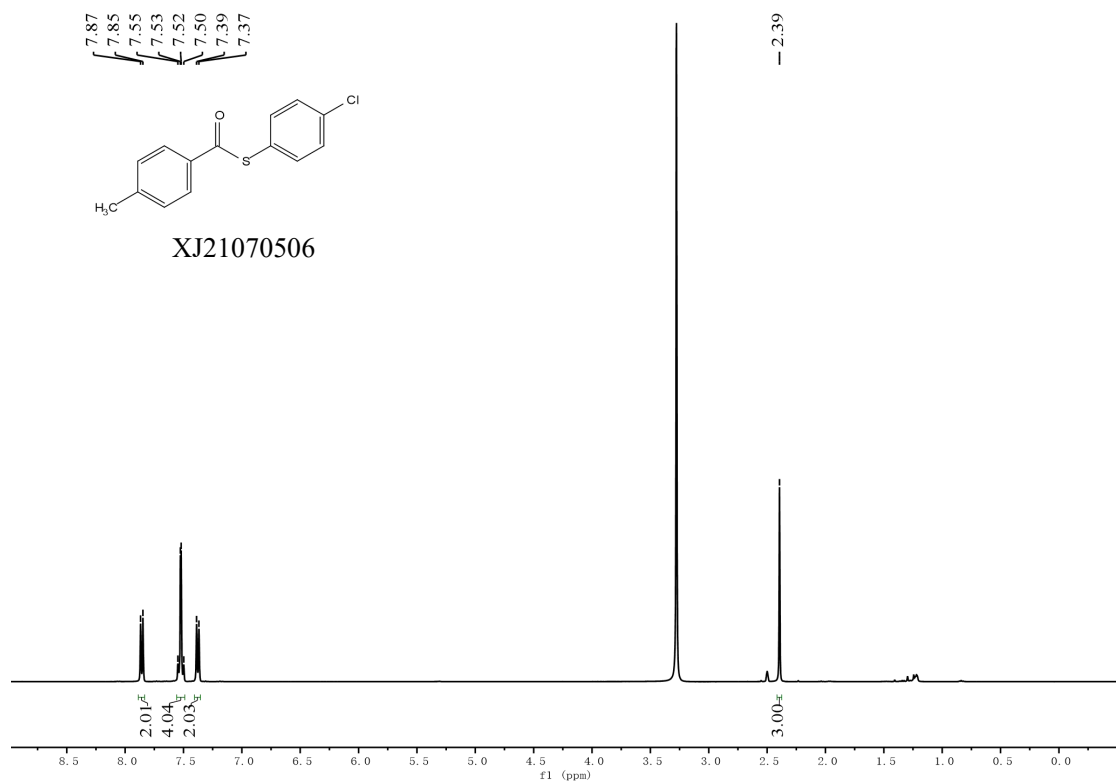

$^{13}\text{C}$  NMR (101 MHz,  $\text{DMSO-}d_6$ ) of compound **3ae**

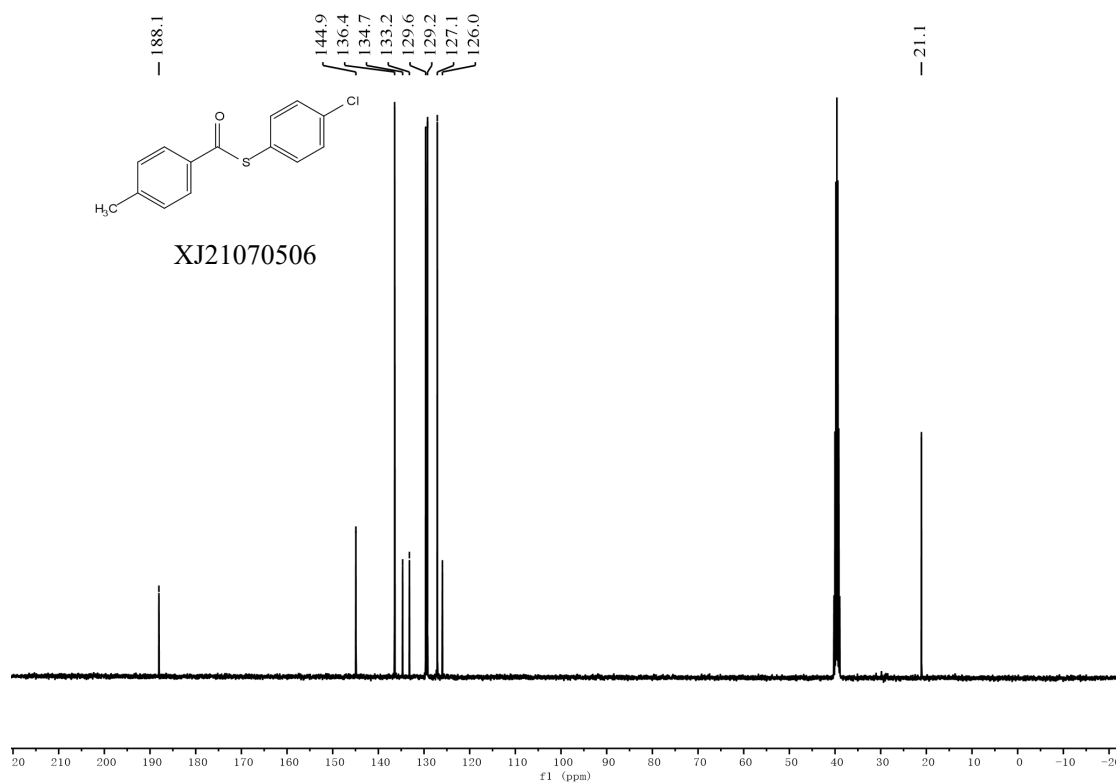

$^1\text{H}$  NMR (400 MHz,  $\text{DMSO-}d_6$ ) of compound **3af**

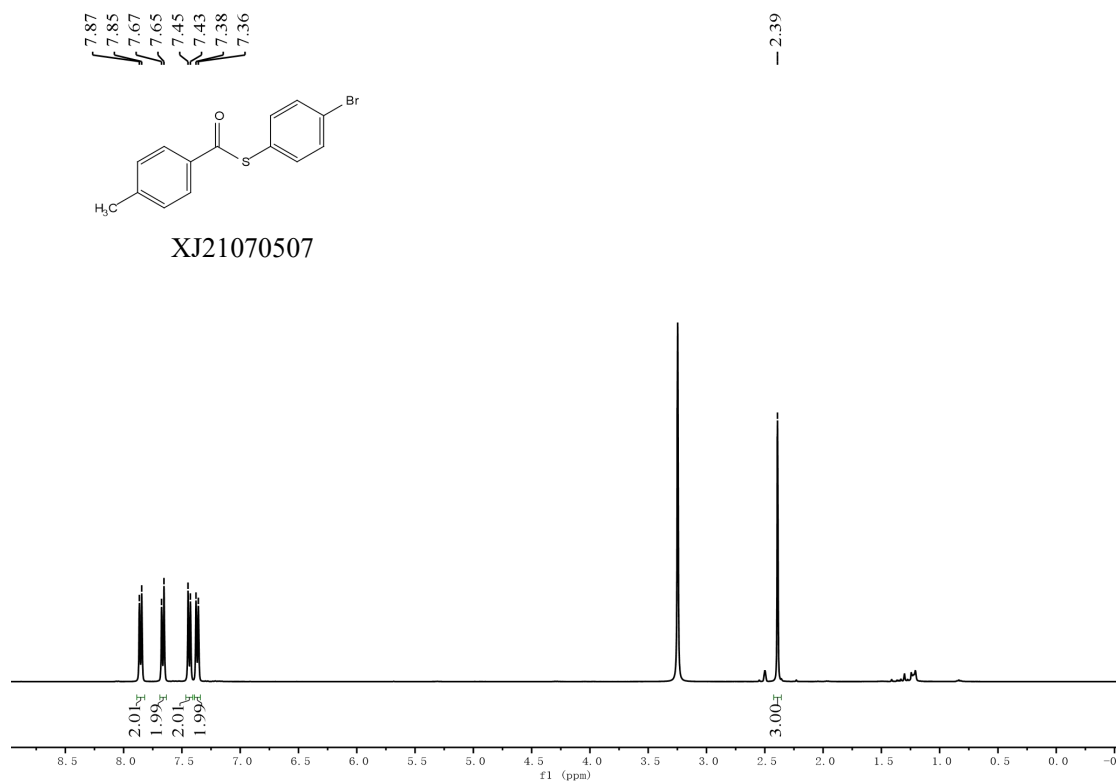

$^{13}\text{C}$  NMR (101 MHz,  $\text{DMSO-}d_6$ ) of compound **3af**

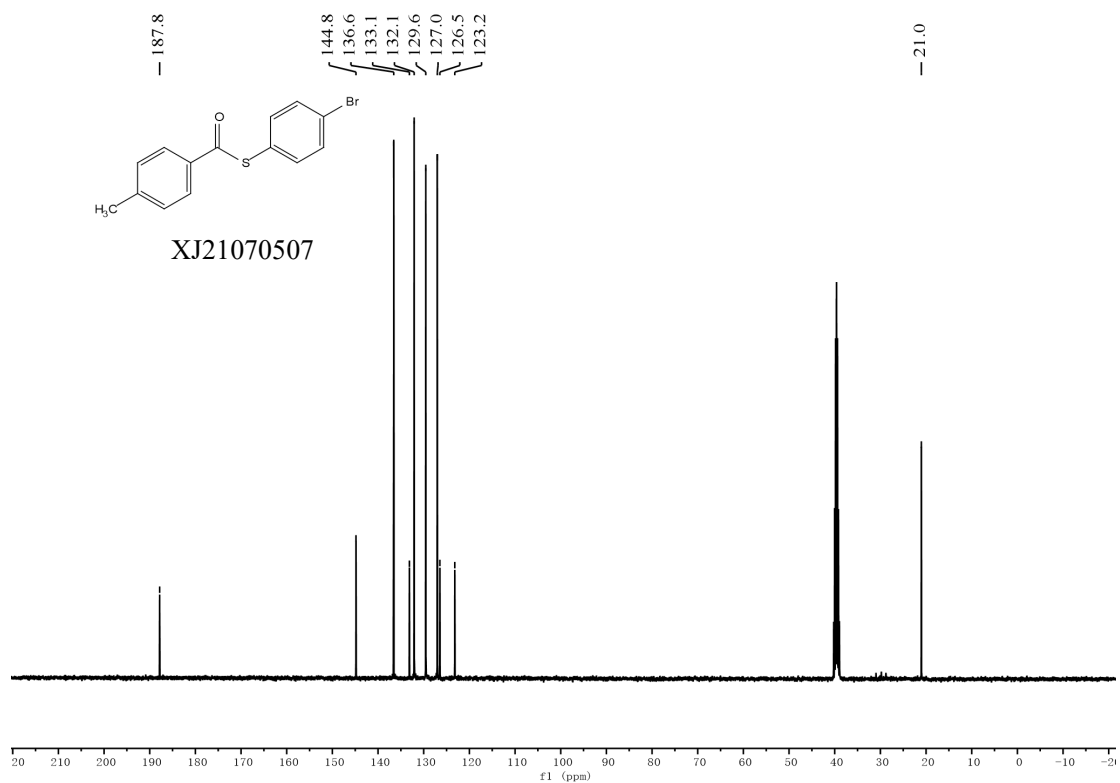

$^1\text{H}$  NMR (400 MHz,  $\text{DMSO-}d_6$ ) of compound **3ag**

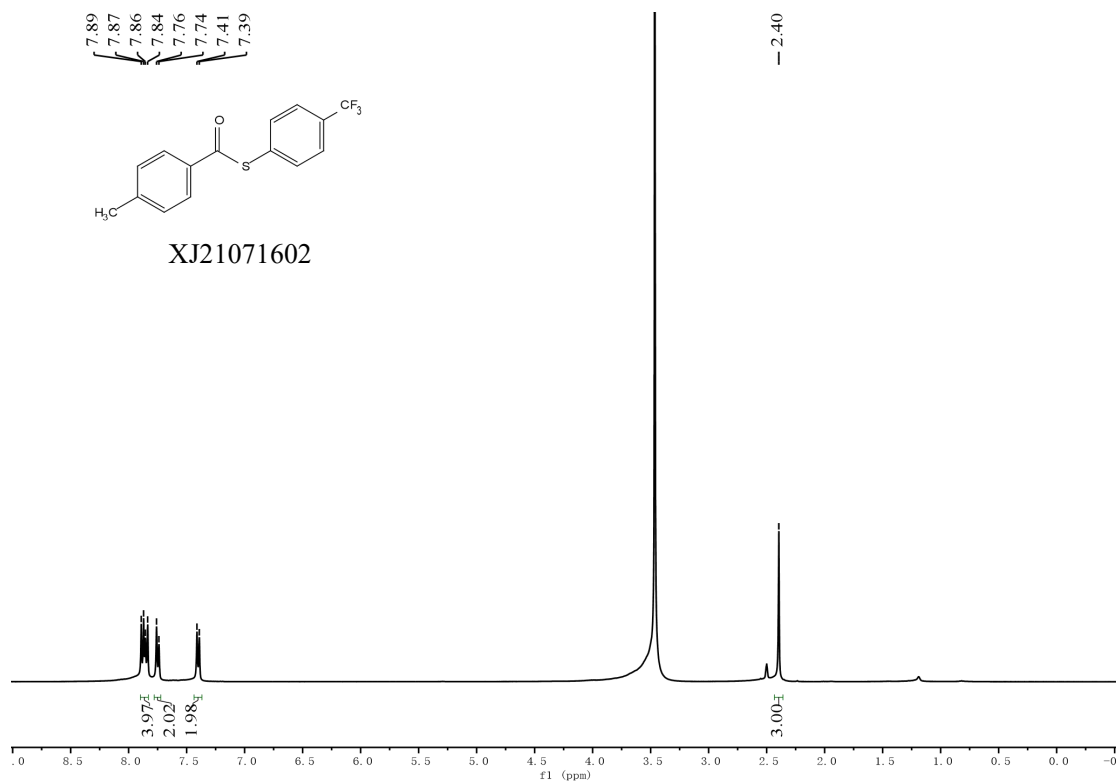

<sup>13</sup>C NMR (101 MHz, DMSO-*d*<sub>6</sub>) of compound **3ag**

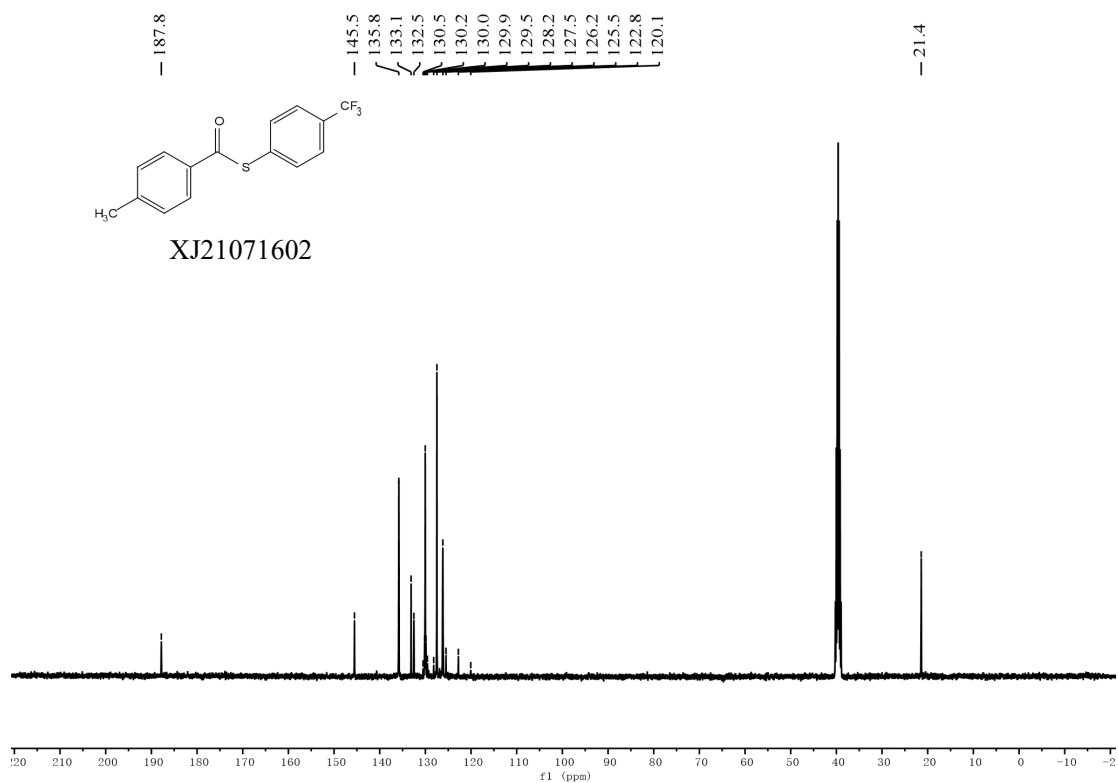

<sup>19</sup>F NMR (376 MHz, DMSO-*d*<sub>6</sub>) of compound **3ag**

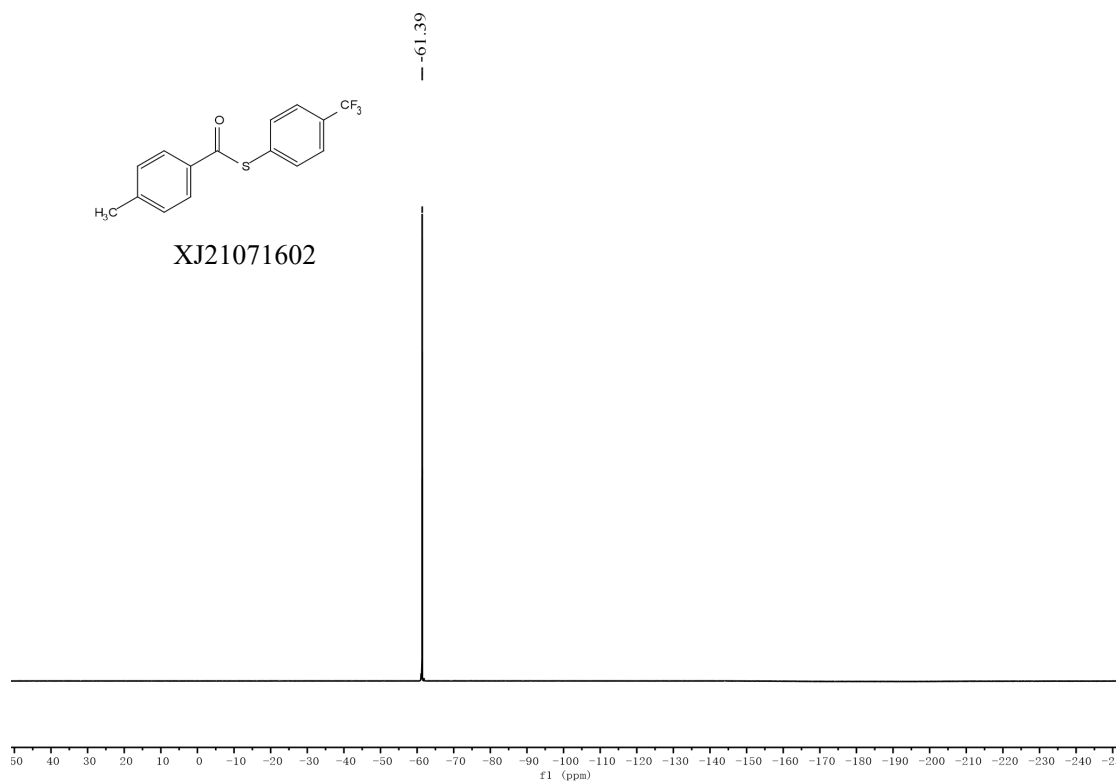

<sup>1</sup>H NMR (400 MHz, DMSO-*d*<sub>6</sub>) of compound **3ah**

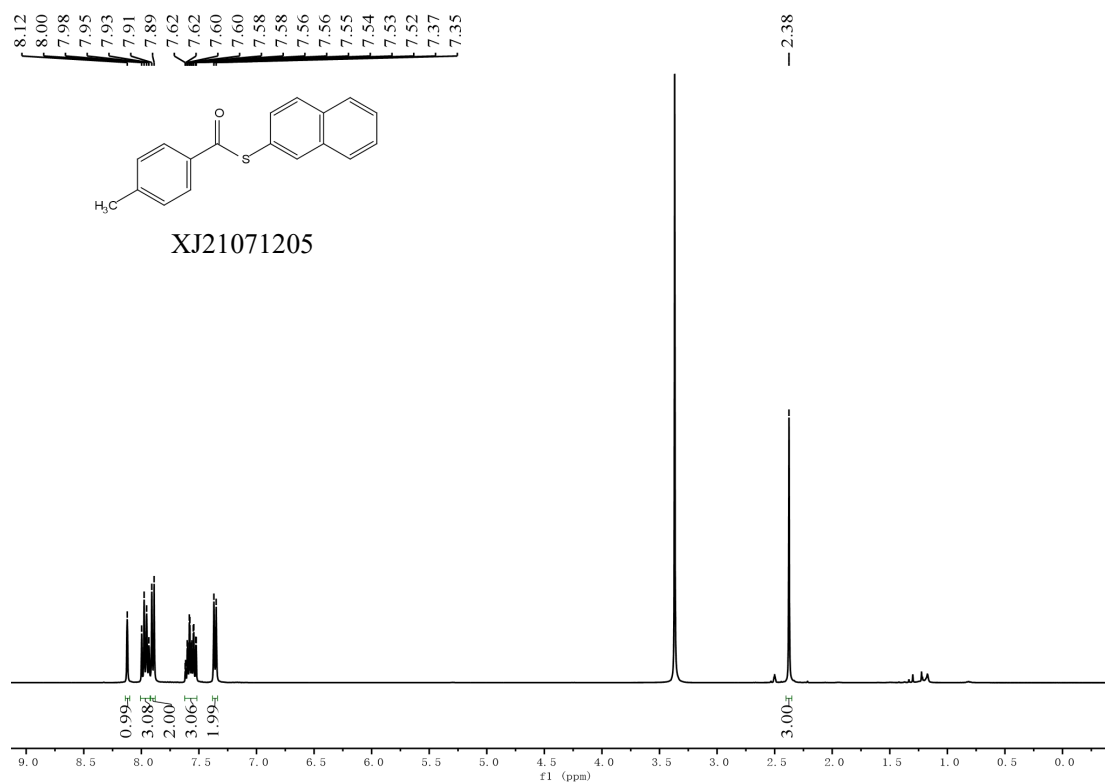

<sup>13</sup>C NMR (101 MHz, DMSO-*d*<sub>6</sub>) of compound **3ah**

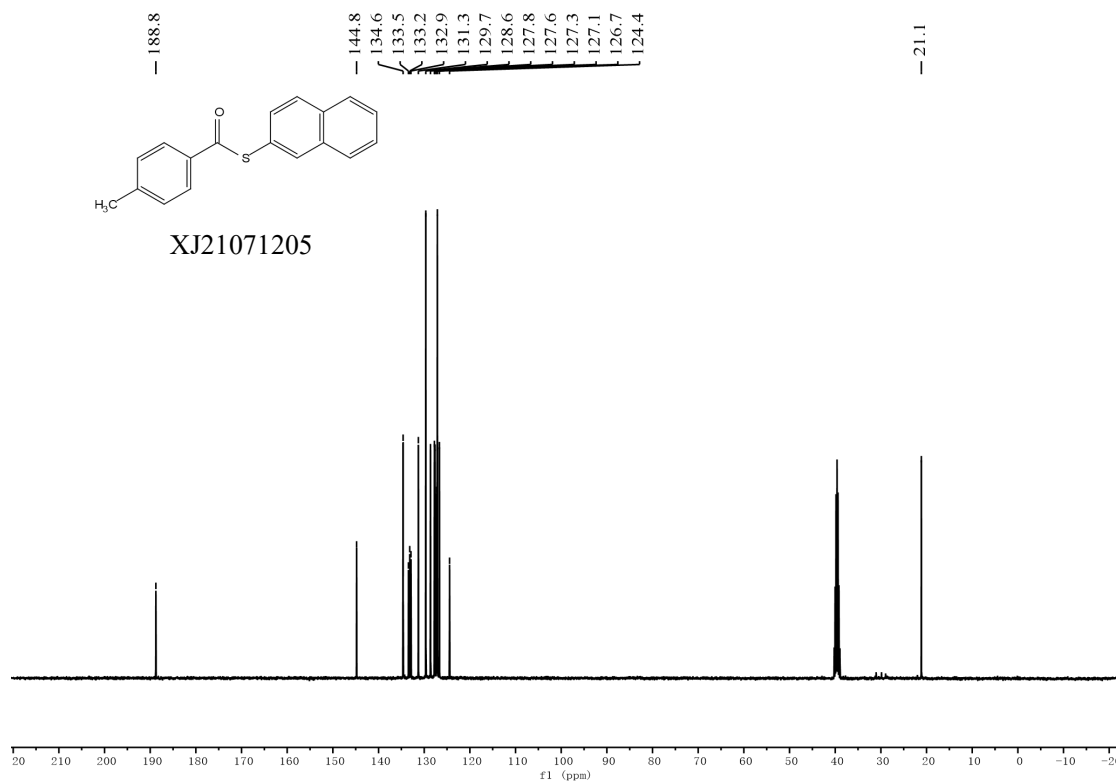



$^1\text{H}$  NMR (400 MHz,  $\text{DMSO-}d_6$ ) of compound **3ai**

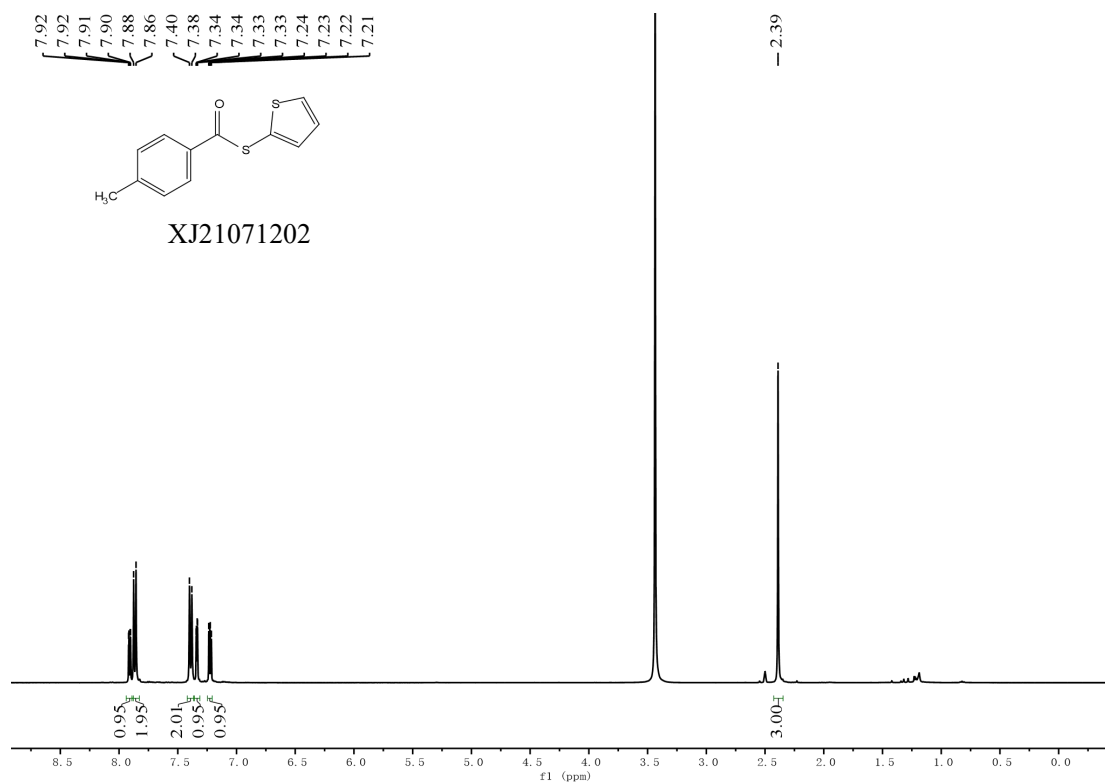

$^{13}\text{C}$  NMR (101 MHz,  $\text{DMSO-}d_6$ ) of compound **3ai**

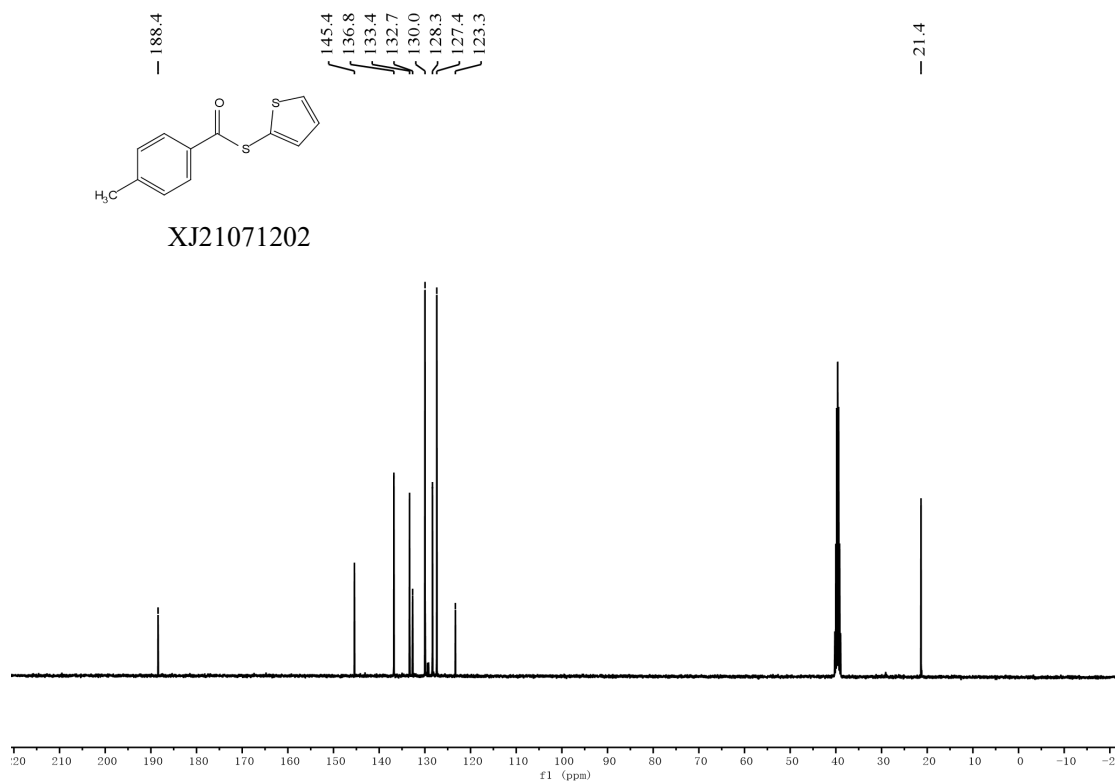

<sup>1</sup>H NMR (400 MHz, DMSO-*d*<sub>6</sub>) of compound **3aj**

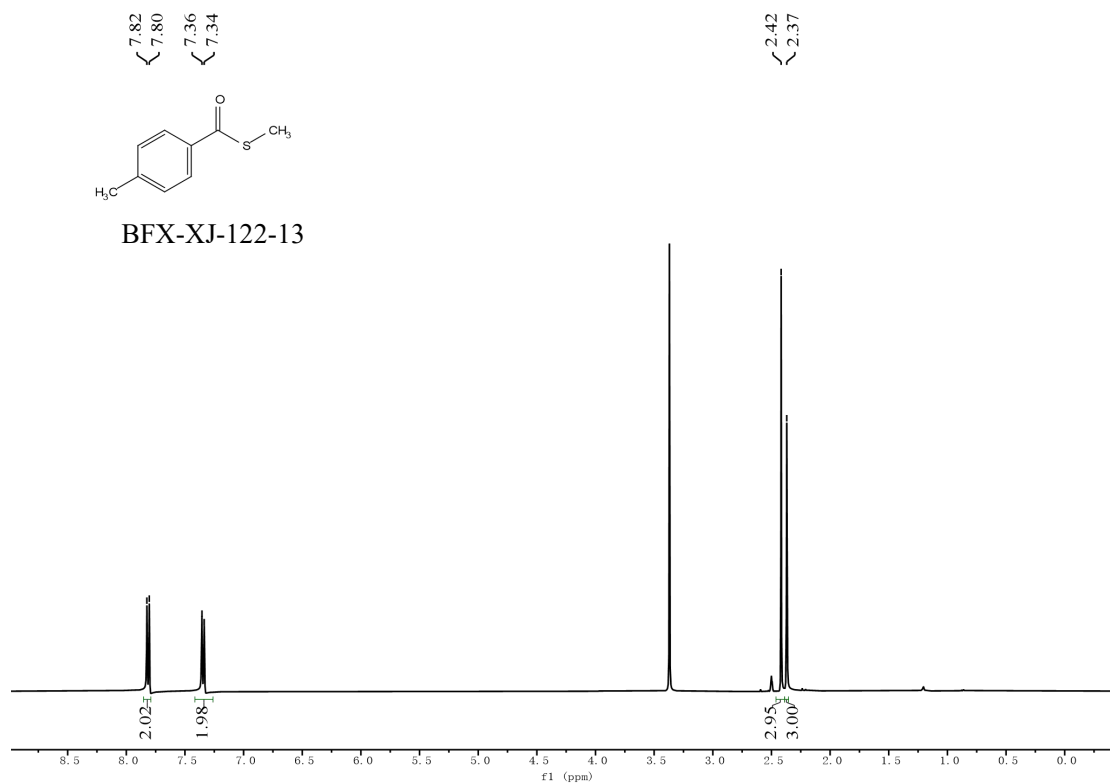

<sup>13</sup>C NMR (101 MHz, DMSO-*d*<sub>6</sub>) of compound **3aj**

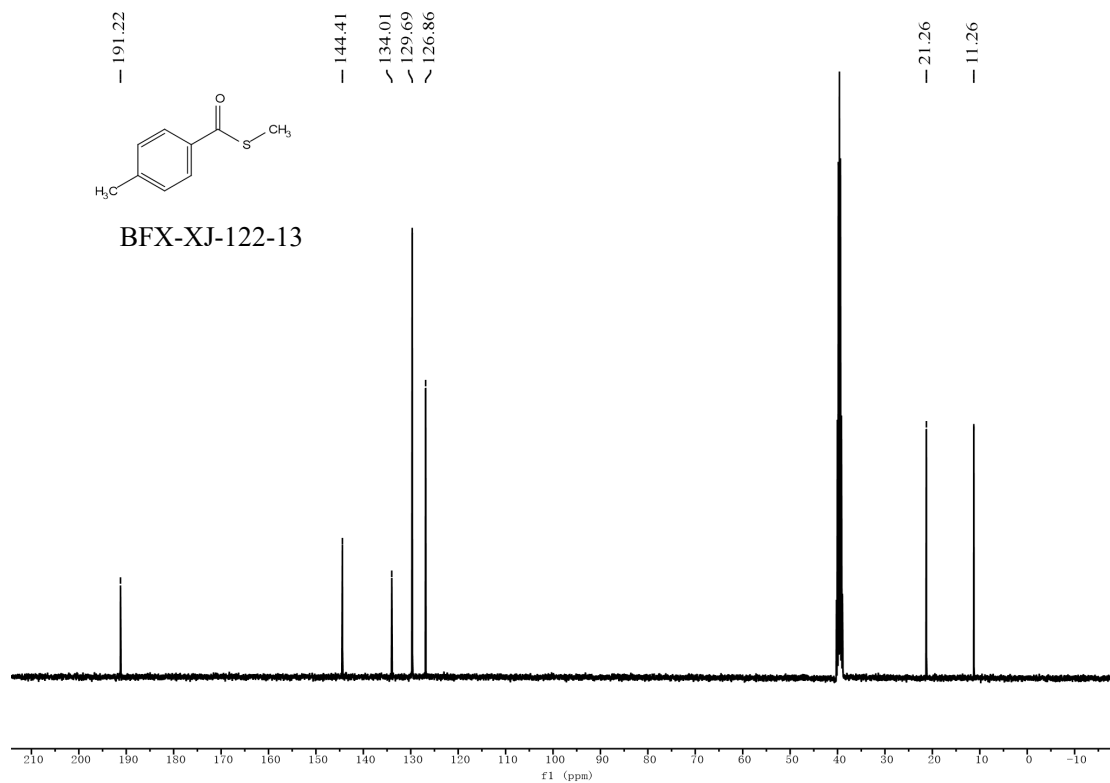

$^1\text{H}$  NMR (400 MHz,  $\text{DMSO-}d_6$ ) of compound **3ak**

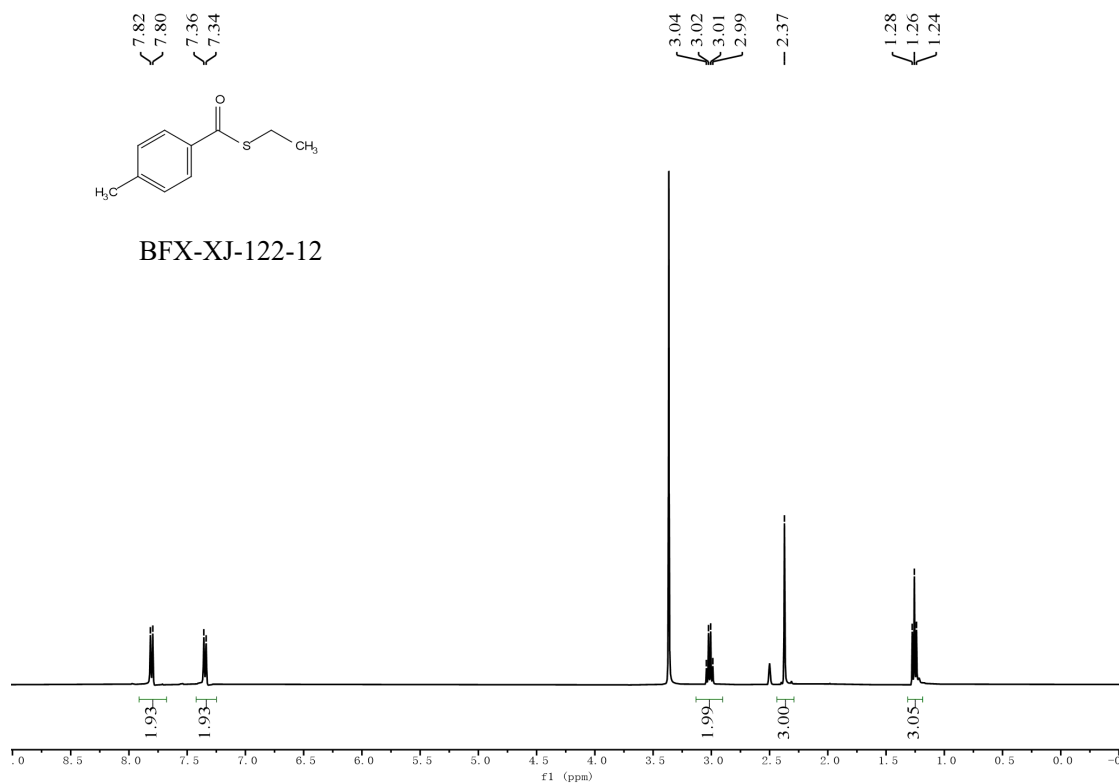

$^{13}\text{C}$  NMR (101 MHz,  $\text{DMSO-}d_6$ ) of compound **3ak**

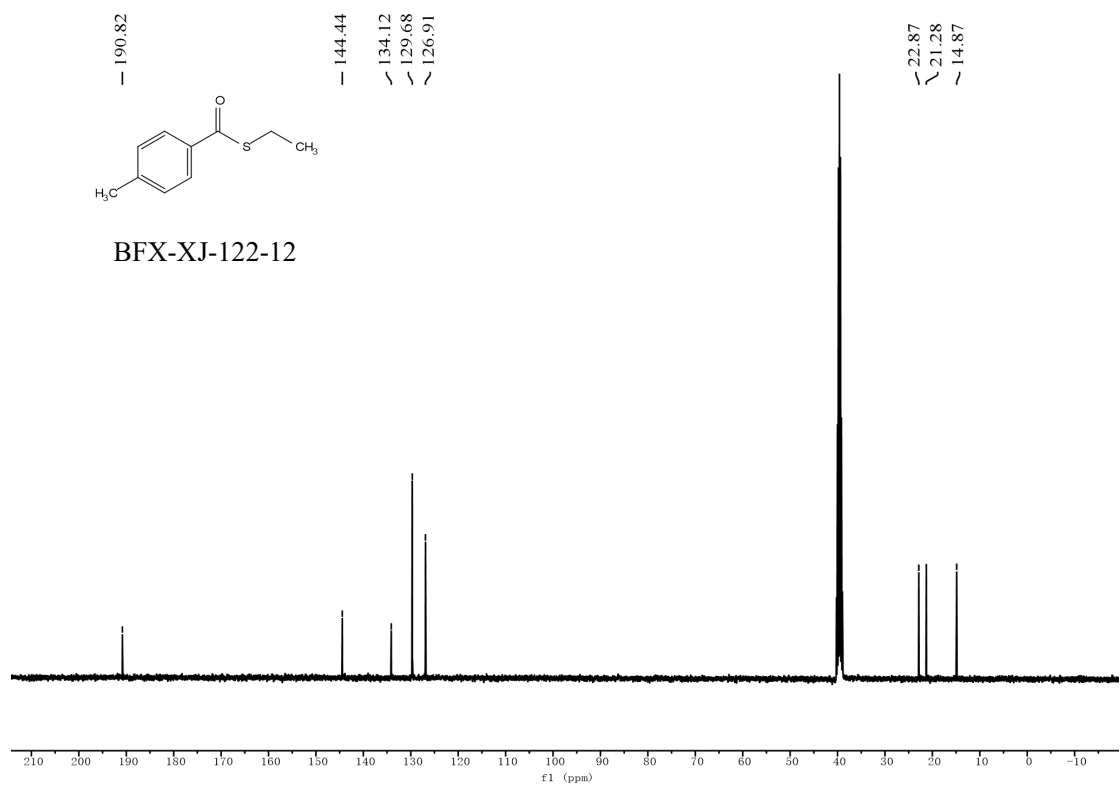

$^1\text{H}$  NMR (400 MHz,  $\text{DMSO-}d_6$ ) of compound **4a**

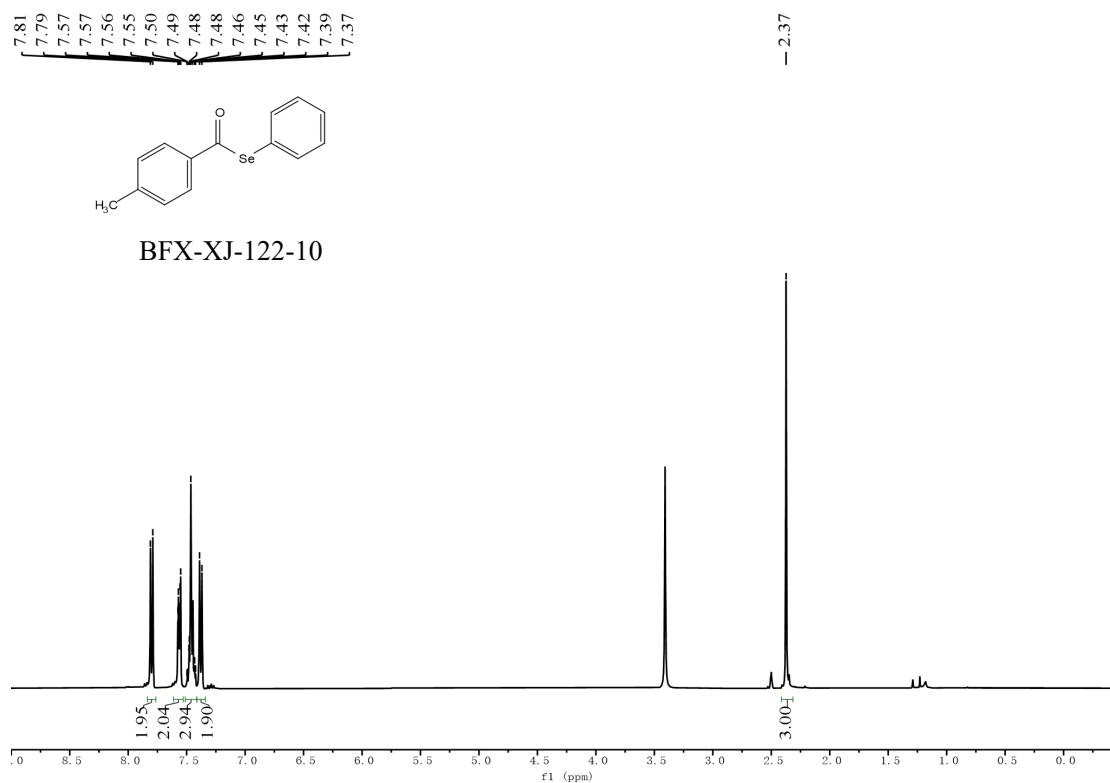

BFX-XJ-122-10

$^{13}\text{C}$  NMR (101 MHz,  $\text{DMSO-}d_6$ ) of compound **4a**

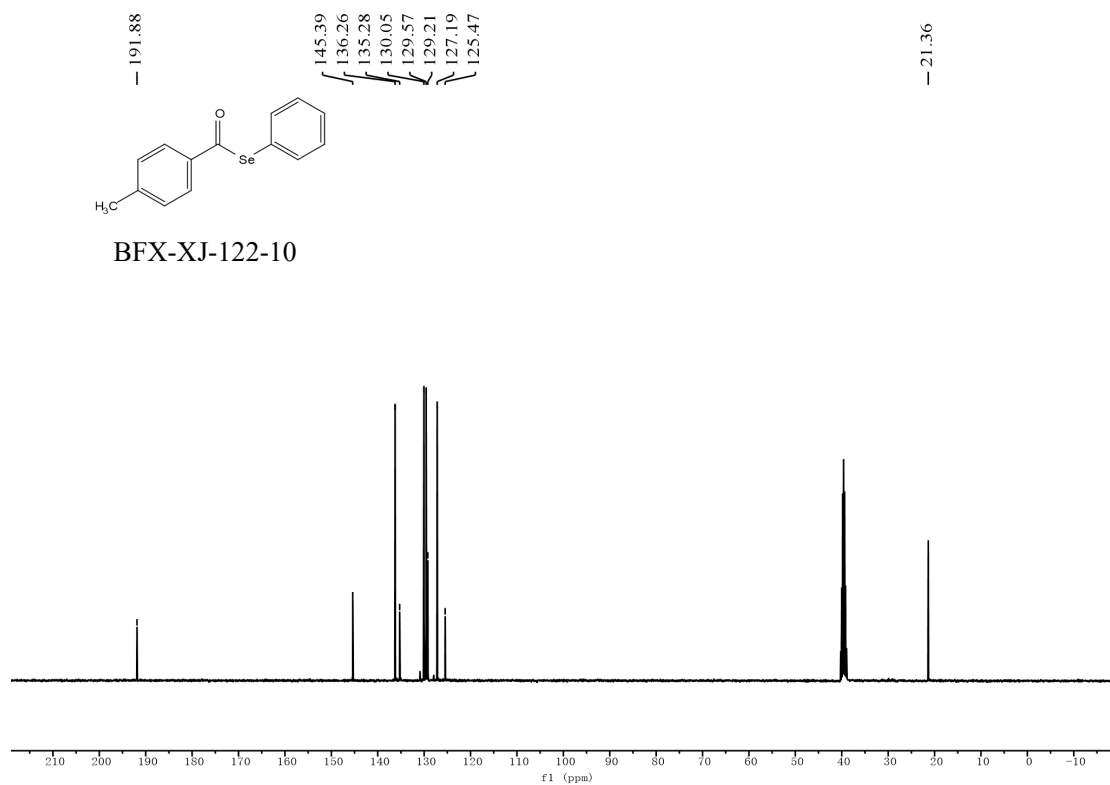

BFX-XJ-122-10

$^1\text{H}$  NMR (400 MHz,  $\text{CDCl}_3$ ) of compound **5a**

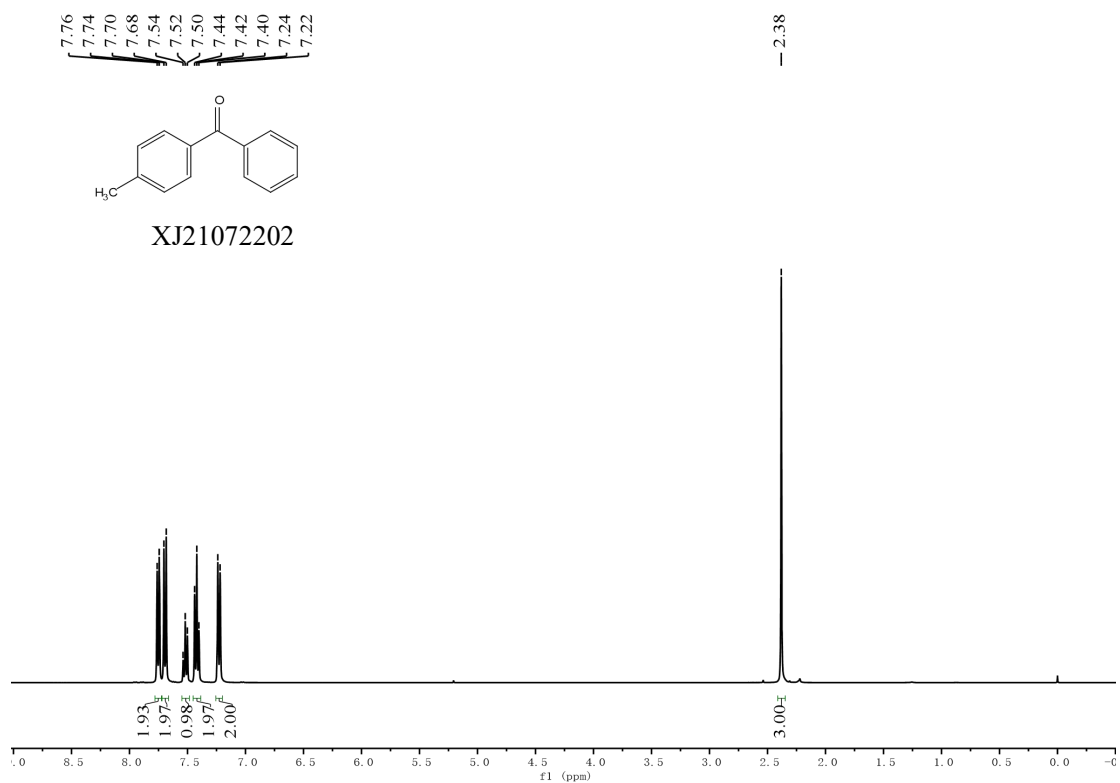

$^{13}\text{C}$  NMR (101 MHz,  $\text{CDCl}_3$ ) of compound **5a**

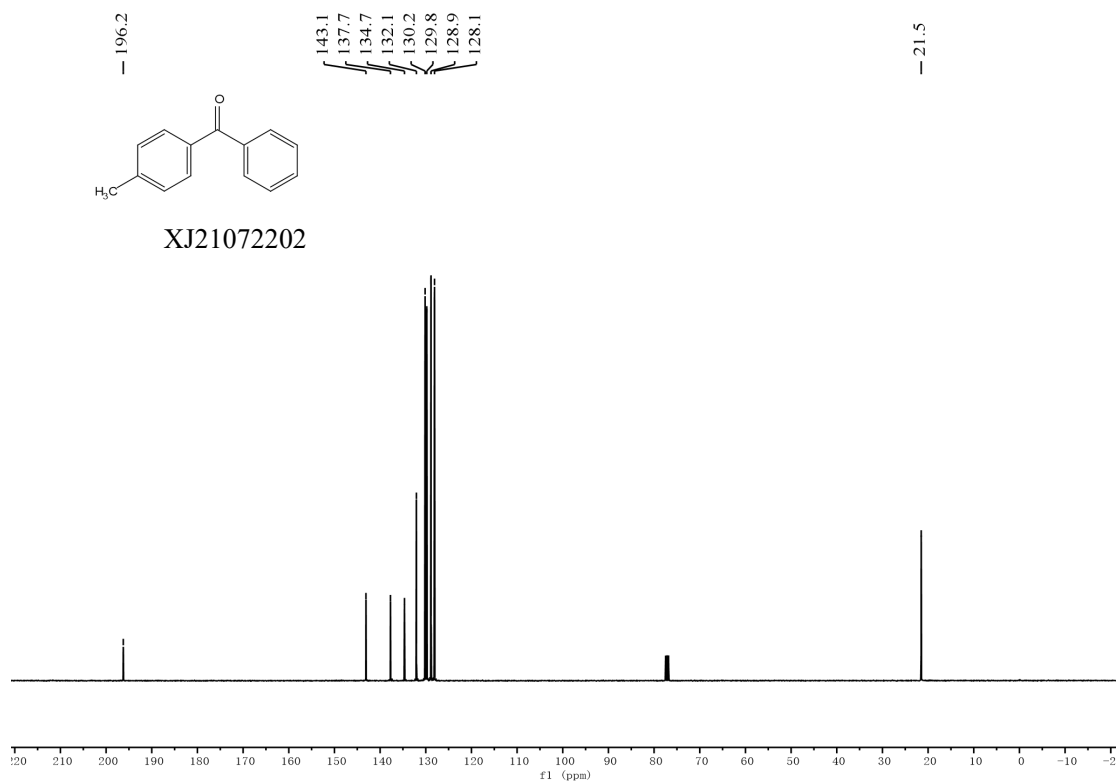

$^1\text{H}$  NMR (400 MHz,  $\text{CDCl}_3$ ) of compound **6a**

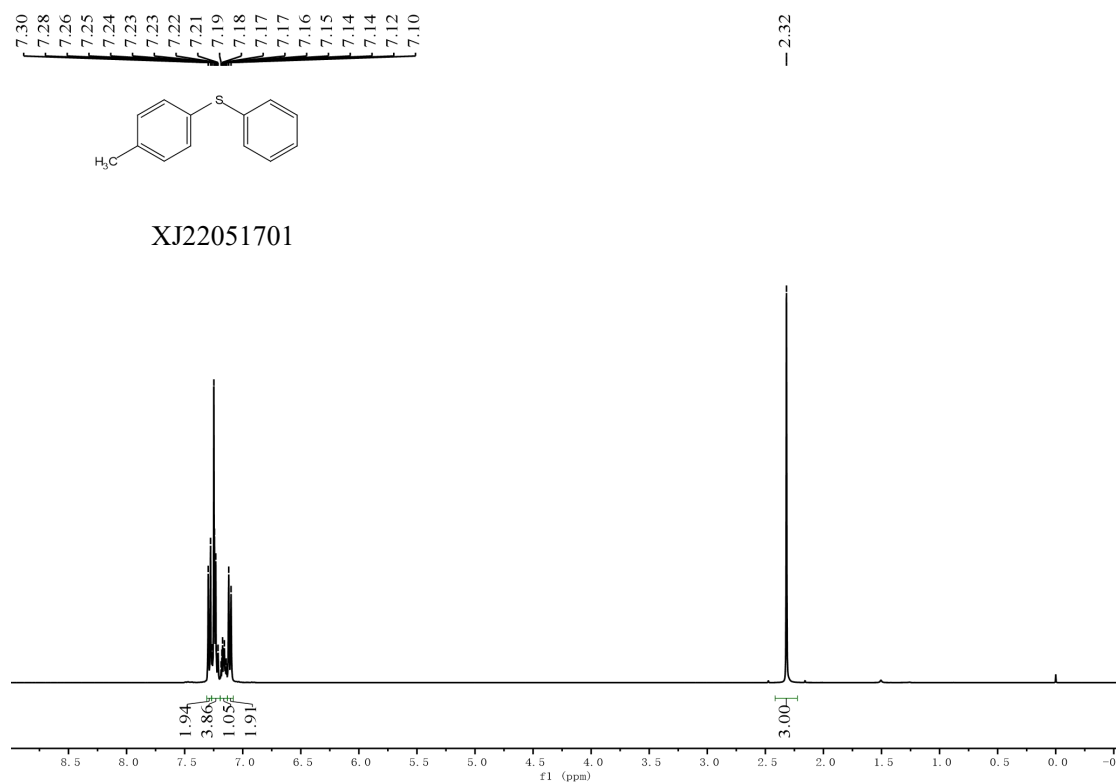

XJ22051701

$^{13}\text{C}$  NMR (101 MHz,  $\text{CDCl}_3$ ) of compound **6a**

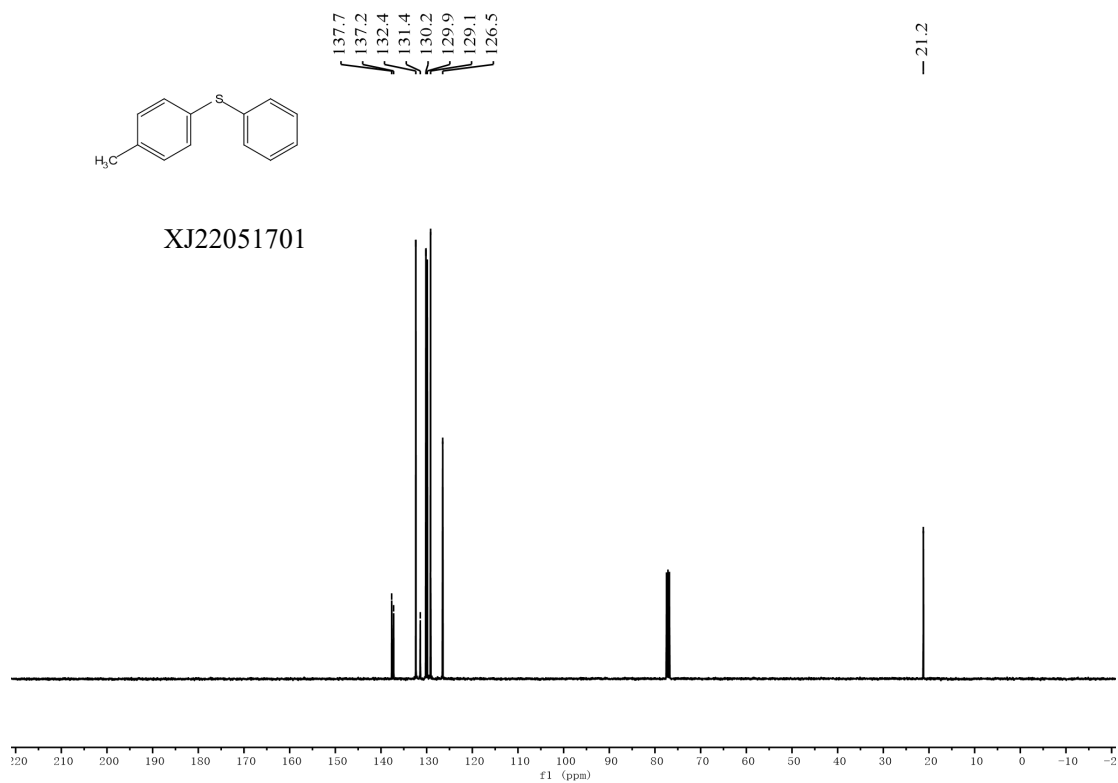

XJ22051701

$^1\text{H}$  NMR (400 MHz,  $\text{CDCl}_3$ ) of compound **7a**

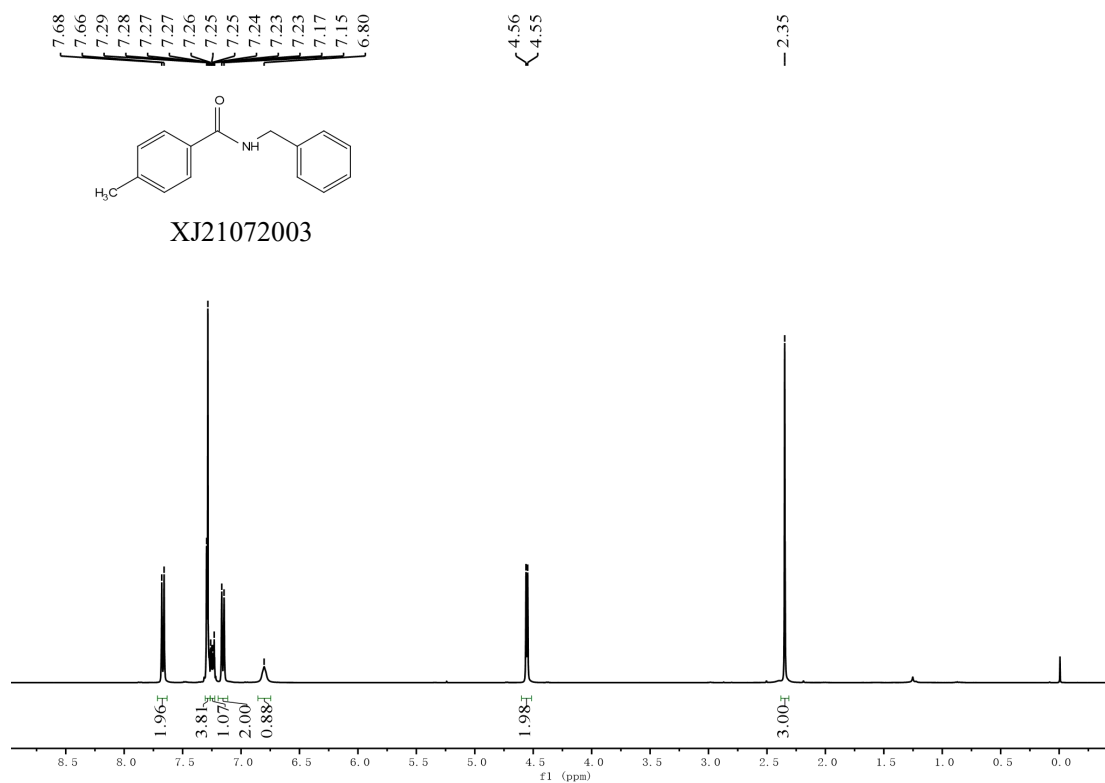

$^{13}\text{C}$  NMR (101 MHz,  $\text{CDCl}_3$ ) of compound **7a**

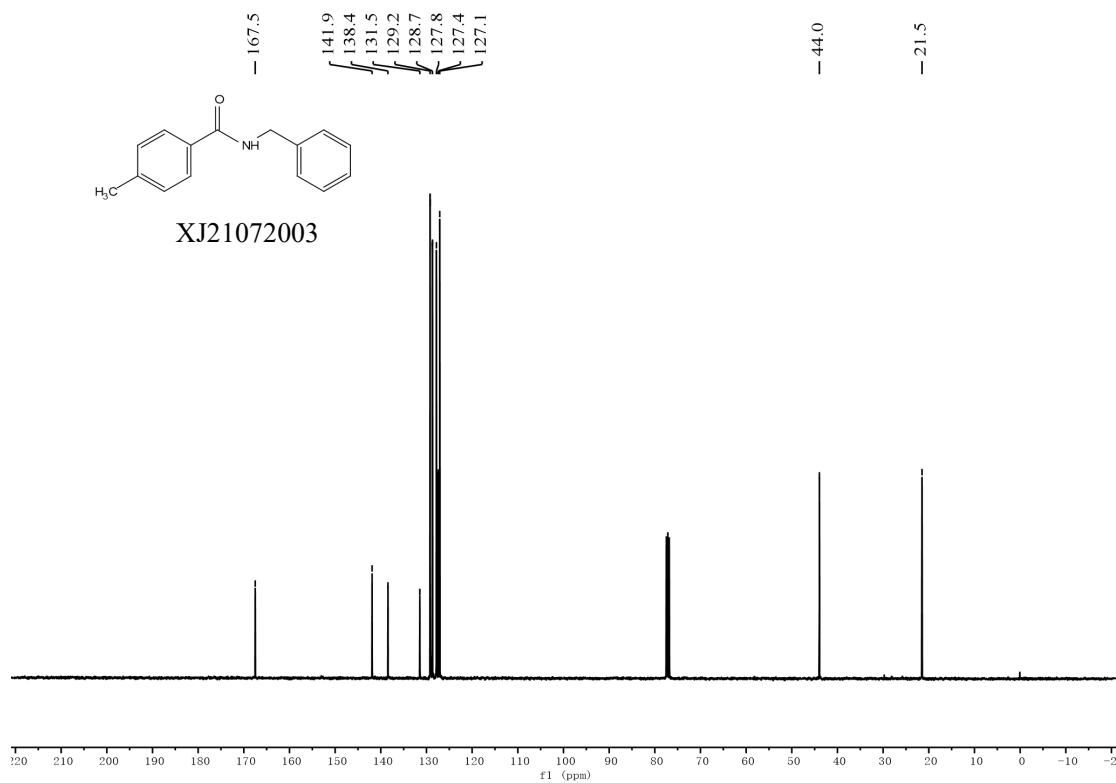

$^1\text{H}$  NMR (400 MHz,  $\text{DMSO-}d_6$ ) of compound **8a**

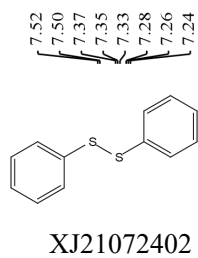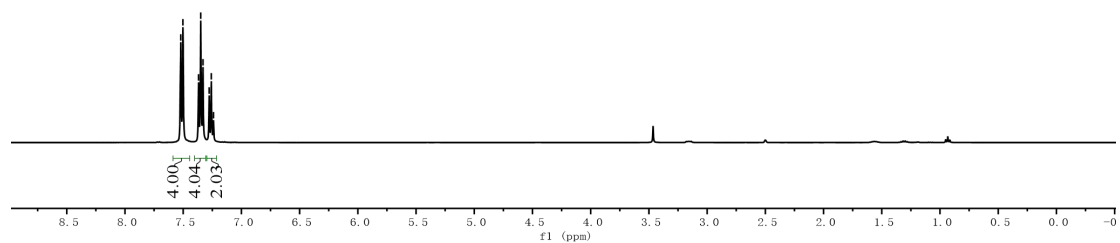

$^{13}\text{C}$  NMR (101 MHz,  $\text{DMSO-}d_6$ ) of compound **8a**

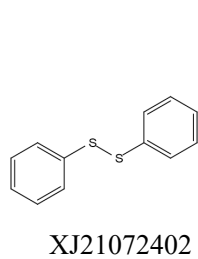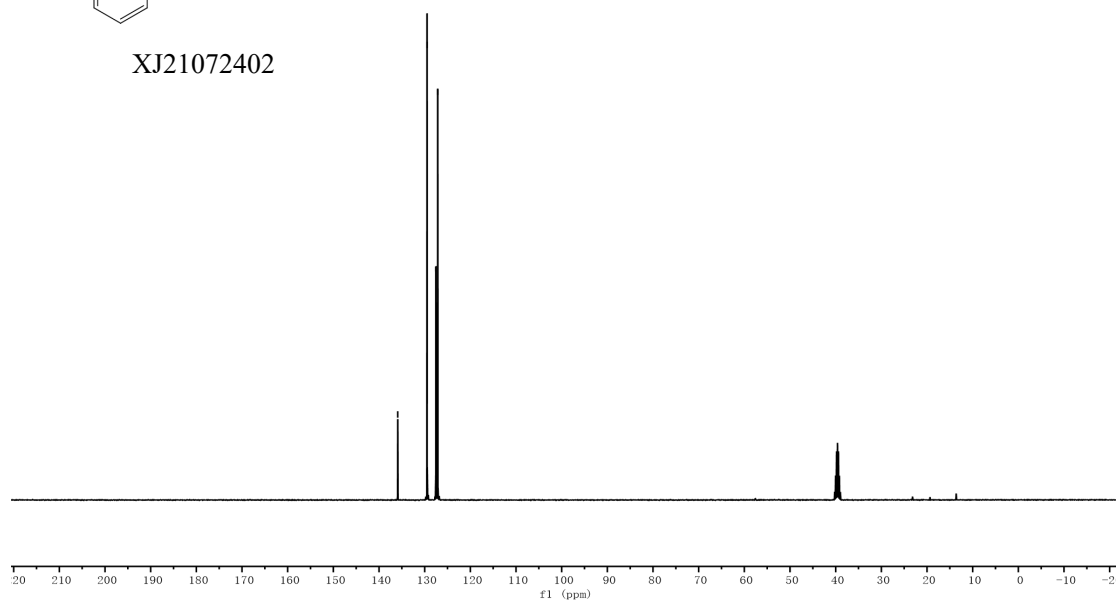



<sup>1</sup>H NMR (400 MHz, DMSO-*d*<sub>6</sub>) of compound **9a**

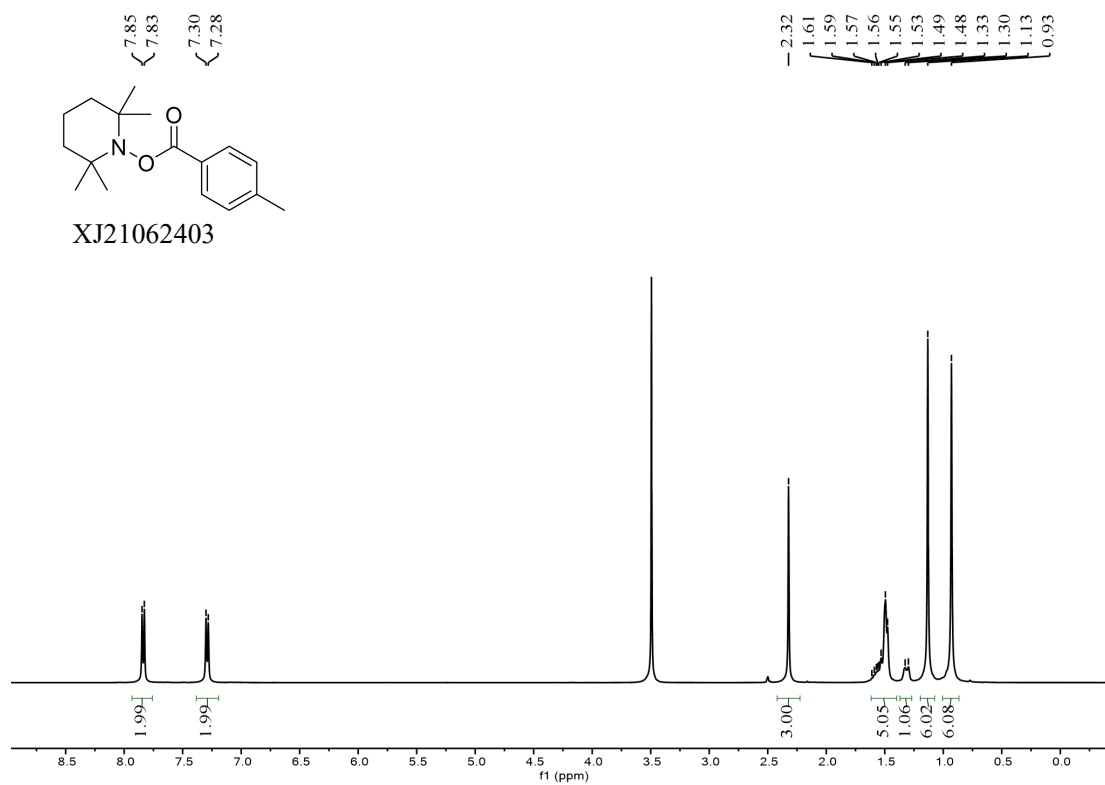

<sup>13</sup>C NMR (101 MHz, DMSO-*d*<sub>6</sub>) of compound **9a**

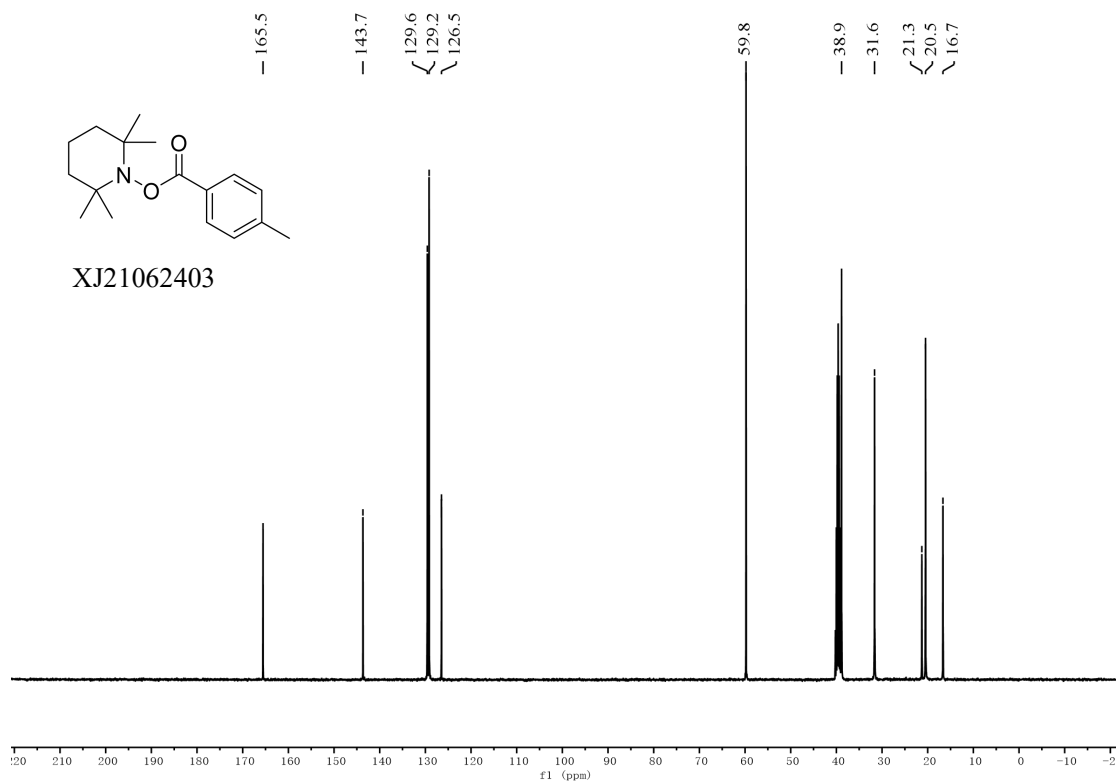

Supplement: d2gc02424a1.pdf [file d2gc02424a1.pdf]
